# Supplementary material for: Photogeneration of quinone methide from adamantylphenol in an ultrafast non-adiabatic dehydration reaction
Source: Royal Society of Chemistry journal article supplement (doi:10.1039/d1cp05690e), 2022-01-01
Supplement: d1cp05690e1.pdf [file d1cp05690e1.pdf]

## Supplementary Information for

### “Photogeneration of Quinone Methide from Adamantylphenol in an Ultrafast Non-adiabatic Dehydration Reaction”

Mateo Forjan<sup>1</sup>, Goran Zgrablić<sup>1</sup>, Silvije Vdović<sup>1</sup>, Marina Šekutor<sup>2</sup>, Nikola Basarić<sup>2</sup>, Piotr Kabacinski<sup>3</sup>, Maryam Nazari Haghighi Pashaki<sup>4</sup>, Hans-Martin Frey<sup>4</sup>, Andrea Cannizzo<sup>4</sup>, Giulio Cerullo<sup>3</sup>

<sup>1</sup> Institute of Physics, Bijenička cesta 46, 10 000 Zagreb, Croatia

<sup>2</sup> Department of Organic Chemistry and Biochemistry, Ruđer Bošković Institute, Bijenička cesta 54, 10 000 Zagreb, Croatia

<sup>3</sup> IFN-CNR, Dipartimento di Fisica, Politecnico di Milano, Piazza Leonardo da Vinci 32, I-20133 Milano, Italy

<sup>4</sup> Institute of Applied Physics, University of Bern, Sidlerstrasse 5, CH-3012 Bern, Switzerland

#### Contents

|                                                                                         |    |
|-----------------------------------------------------------------------------------------|----|
| 1. Deconvolution of rise time in transient absorption data .....                        | 2  |
| 1.1 Results of transient absorption using THG of 120 fs at 800 nm as a pump pulse ..... | 2  |
| 1.2 Results of transient absorption using sub-20-fs UV NOPA pump pulse .....            | 6  |
| 2. Intensity dependence of transient absorption spectra .....                           | 10 |
| 3. Absorption spectra and transient absorption spectra .....                            | 11 |
| 4. Laser flash photolysis measurements.....                                             | 13 |
| 5. Fluorescence upconversion measurements .....                                         | 15 |
| 5.1 Instrument response function .....                                                  | 15 |
| 5.2 Global analysis of FIUC data .....                                                  | 16 |
| 5.3 FIUC of anisole molecule .....                                                      | 18 |
| 6. Time-correlated single photon counting (TC-SPC) measurements.....                    | 19 |
| 7. Computations .....                                                                   | 21 |

## 1. Deconvolution of rise time in transient absorption data

### 1.1 Results of transient absorption using THG of 120 fs at 800 nm as a pump pulse

Since the results of transient absorption measurements didn't show significant dynamics in first few picoseconds after excitation with 267 nm, 120 fs pulses we performed fitting of several kinetic profiles (at 425, 500 and 600 nm) focusing on first 10 ps. For the model function we used two exponential functions convoluted with identical Gaussian function to account for instrument response function (IRF) of our transient absorption spectrometer. Time constant of the first exponential function ( $t_1$ ) having negative amplitude then represented deconvoluted rise time of kinetic profile at that particular wavelength. In order to reduce number of free parameters, time constant for the exponential decay was fixed at 1 ns. Where needed, we expanded this model to account for coherent artifacts that could not be removed from the data without significantly affecting measured kinetic profiles. Hence, we included in the model function additional Gaussian in Figure S1 to account for two-photon absorption (TPA) signal around zero delay time, and two Gaussians were added to account for cross phase modulation signal (XPM) superimposed on exponential rise (Figures S7 to S10). It is known that, in the case of broadband chirped probe pulse, XPM signal splits in two, where the transient optical density will exhibit a gain ( $\Delta OD < 0$ ) followed by a loss ( $\Delta OD > 0$ ), i.e., a dispersion shape for the first XPM signal, while at increased delay times second XPM-induced pump-probe signal is present, which is out of phase with the first one.<sup>1</sup> In addition, loss and gain amplitudes in this case are not identical, and only the overall signal averages to zero. This prompted us to use two Gaussian functions with the position of the center of the peak and peak amplitude being free parameters for modelling XPM artifacts.

General model:

$$f(t) = A_1 e^{-\frac{\left(t-p-\frac{\sigma^2}{2t_1}\right)}{t_1}} \left[ 1 + \operatorname{erf}\left(\frac{t-p-\frac{1}{t_1}\sigma^2}{\sqrt{2}\sigma}\right) \right] + A_2 e^{-\frac{\left(t-p-\frac{\sigma^2}{2 \cdot 10^6}\right)}{10^6}} \left[ 1 + \operatorname{erf}\left(\frac{t-p-\frac{1}{10^6}\sigma^2}{\sqrt{2}\sigma}\right) \right] + A_3 e^{-\frac{t^2}{2\sigma^2}}$$

Coefficients (with 95% confidence bounds):

$$A_1 = -0.0003891 \text{ } (-0.004005, 0.003227) \quad A_2 = 0.0003032 \text{ } (0.0003006, 0.0003058)$$

$$A_3 = 0.0006108 \text{ } (0.0004117, 0.0008099)$$

$$p = 175.3 \text{ } (-2646, 2997) \quad \text{sigma} = 365.9 \text{ } (334.5, 397.4)$$

$$t_1 = \mathbf{227.9} \text{ } (-\mathbf{84.93}, \mathbf{540.6})$$

Goodness of fit:

$$\text{SSE: } 6.133\text{e-}08 \quad \text{R-square: } 0.9942 \quad \text{Adjusted R-square: } 0.994 \quad \text{RMSE: } 2.071\text{e-}05$$

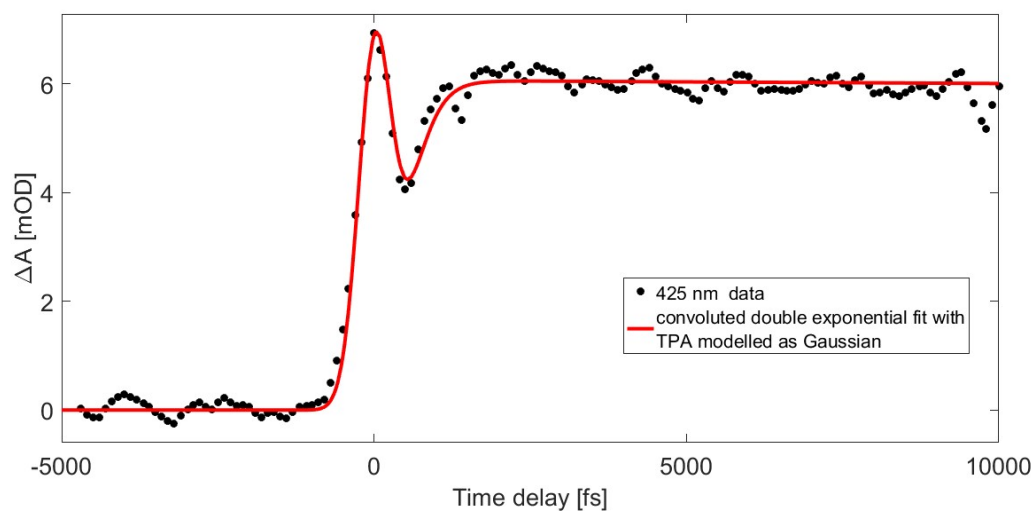

**Figure S1**

General model:

$$f(t) = A_1 e^{-\frac{\left(t-p-\frac{\sigma^2}{2t_1}\right)}{t_1}} \left[ 1 + \operatorname{erf}\left(\frac{t-p-\frac{1}{t_1}\sigma^2}{\sqrt{2}\sigma}\right) \right] + A_2 e^{-\frac{\left(t-p-\frac{\sigma^2}{2 \cdot 10^6}\right)}{10^6}} \left[ 1 + \operatorname{erf}\left(\frac{t-p-\frac{1}{10^6}\sigma^2}{\sqrt{2}\sigma}\right) \right] + A_3 e^{-\frac{\left(t-p-\frac{\sigma^2}{2t_1}\right)}{t_1}}$$

Coefficients (with 95% confidence bounds):

$$A_1 = -0.0003054 \text{ } (-0.01061, 0.01) \quad A_2 = 0.000407 \text{ } (0.0004037, 0.0004102)$$

$$p = -7.86 \text{ } (-5054, 5038) \quad \sigma = 555.8 \text{ } (159.8, 951.9)$$

$$t_1 = \mathbf{211.4 \text{ } (-358, 780.7)}$$

Goodness of fit:

$$\text{SSE: } 8.264\text{e-}08 \quad \text{R-square: } 0.9958 \quad \text{Adjusted R-square: } 0.9957 \quad \text{RMSE: } 2.396\text{e-}05$$

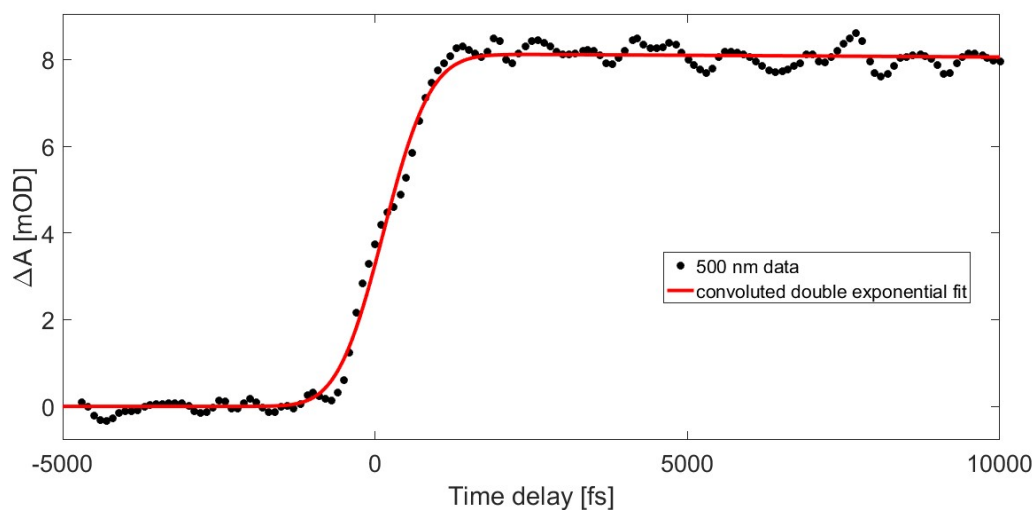

**Figure S2**

General model:

$$f(t) = A_1 e^{-\frac{(t-p-\frac{\sigma^2}{2t_1})}{t_1}} \left[ 1 + \operatorname{erf}\left(\frac{t-p-\frac{1}{t_1}\sigma^2}{\sqrt{2}\sigma}\right) \right] + A_2 e^{-\frac{(t-p-\frac{\sigma^2}{2 \cdot 10^6})}{10^6}} \left[ 1 + \operatorname{erf}\left(\frac{t-p-\frac{1}{10^6}\sigma^2}{\sqrt{2}\sigma}\right) \right] + A_3 e^{-\frac{(t-p-\frac{\sigma^2}{2t_1})}{t_1}}$$

Coefficients (with 95% confidence bounds):

$$\begin{aligned} A_1 &= -0.0004303 \quad (-0.01574, 0.01488) & A_2 &= 0.000353 \quad (0.000349, 0.000357) \\ p &= -86.56 \quad (-1.016e+04, 9986) & \text{sigma} &= 553.4 \quad (-699.3, 1806) \\ t_1 &= \mathbf{248} \quad (\mathbf{-409.5, 905.5}) \end{aligned}$$

Goodness of fit:

$$\text{SSE: } 6.651e-08 \quad \text{R-square: } 0.9954 \quad \text{Adjusted R-square: } 0.9953 \quad \text{RMSE: } 2.18e-05$$

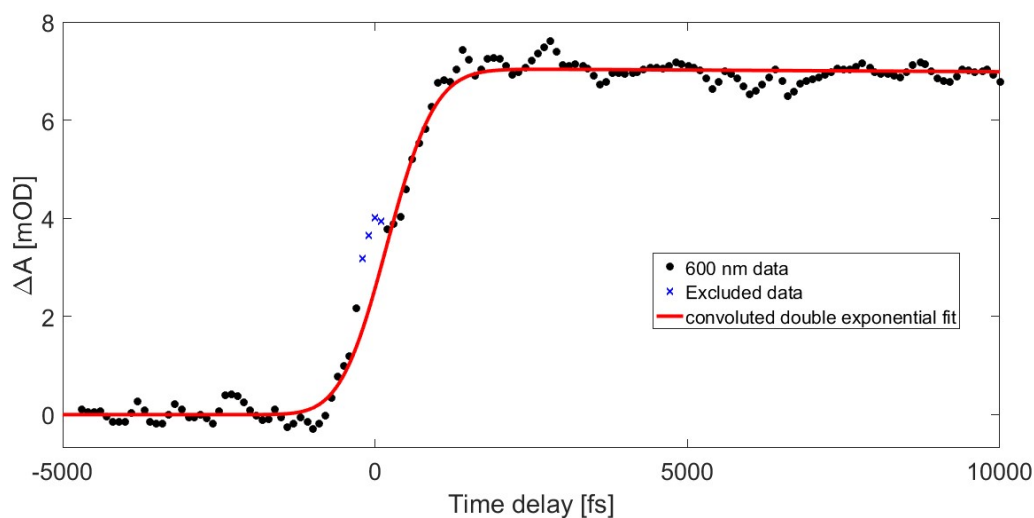

**Figure S3**

To evaluate slow decay of signal at longer wavelengths that we believe originates from solvated electrons we performed simple bi-exponential fitting for the entire range of time delay points (up to 1.1 ns) for kinetic profiles corresponding to 500, 550 and 600 nm.

General model:

$$f(t) = A_1 e^{b \cdot t} + A_2 e^{c \cdot t}$$

Coefficients (with 95% confidence bounds):

$$A_1 = 0.001542 \text{ (0.00149, 0.001593)}$$

$$b = -2.866e-05 \text{ (-3.18e-05, -2.553e-05)} - 35 \text{ ps}$$

$$A_2 = 0.002615 \text{ (0.002577, 0.002654)}$$

$$c = -6.328e-07 \text{ (-6.584e-07, -6.071e-07)} - 1.5 \text{ ns}$$

Goodness of fit:

SSE: 1.287e-05    R-square: 0.975    Adjusted R-square: 0.9749    RMSE: 0.000139

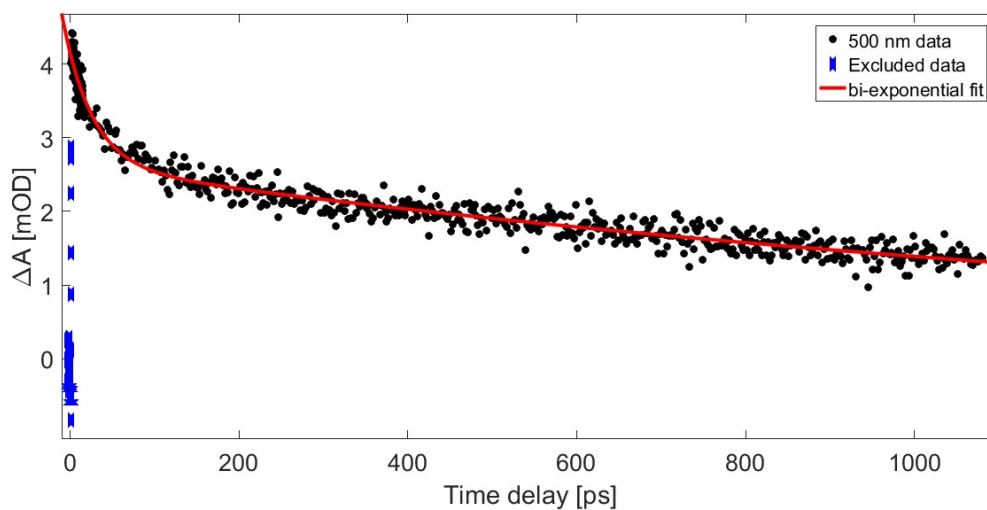

Figure S4

General model:

$$f(t) = A_1 e^{b \cdot t} + A_2 e^{c \cdot t}$$

Coefficients (with 95% confidence bounds):

$$A_1 = 0.001125 \text{ (0.001071, 0.00118)}$$

$$b = -2.801e-05 \text{ (-3.247e-05, -2.355e-05)} - 35 \text{ ps}$$

$$A_2 = 0.002108 \text{ (0.002067, 0.002149)}$$

$$c = -5.481e-07 \text{ (-5.809e-07, -5.153e-07)} - 1.8 \text{ ns}$$

Goodness of fit:

SSE: 1.511e-05    R-square: 0.9471    Adjusted R-square: 0.9469    RMSE: 0.0001504

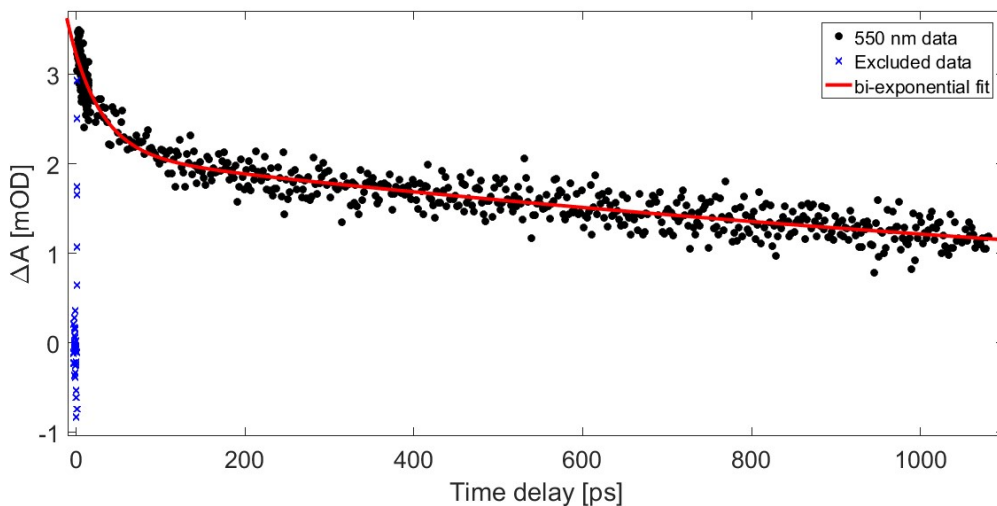

Figure S5

General model:

$$f(t) = A_1 e^{b \cdot t} + A_2 e^{c \cdot t}$$

Coefficients (with 95% confidence bounds):

$$A_1 = 0.001514 \quad (0.001479, 0.001549)$$

$$b = -3.506e-05 \quad (-3.748e-05, -3.264e-05) - 28.5 \text{ ps}$$

$$A_2 = 0.002624 \quad (0.002599, 0.002648)$$

$$c = -6.594e-07 \quad (-6.764e-07, -6.425e-07) - 1.5 \text{ ns}$$

Goodness of fit:

SSE: 6.179e-06    R-square: 0.9884    Adjusted R-square: 0.9883    RMSE: 9.505e-05

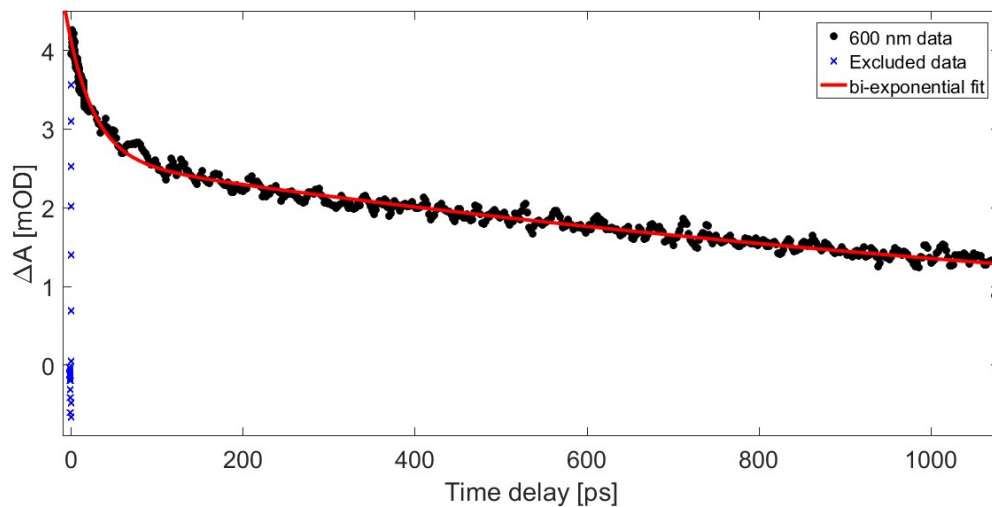

Figure S6

## 1.2 Results of transient absorption using sub-20-fs UV NOPA pump pulse

The same fitting procedure was used for extracting deconvoluted rise time of second set of measurements with better IRF due to the sub-20-fs UV pump pulse driving the photochemical reaction.

General model:

$$f(t) = A_1 e^{-\frac{\left(t-p-\frac{\sigma^2}{2t_1}\right)}{t_1}} \left[ 1 + \operatorname{erf}\left(\frac{t-p-\frac{1}{t_1}\sigma^2}{\sqrt{2}\sigma}\right) \right] + A_2 e^{-\frac{\left(t-p-\frac{\sigma^2}{2 \cdot 10^6}\right)}{10^6}} \left[ 1 + \operatorname{erf}\left(\frac{t-p-\frac{1}{10^6}\sigma^2}{\sqrt{2}\sigma}\right) \right] + A_3 e^{-\frac{(t-r)^2}{2\sigma^2}} + A_4 e^{-\frac{(t-n)^2}{2\sigma^2}}$$

Coefficients (with 95% confidence bounds):

|                                     |                                         |
|-------------------------------------|-----------------------------------------|
| A1 = -0.001039 (-3.707, 3.705)      | A2 = 0.001039 (0.0007483, 0.001329)     |
| A3 = 0.001602 (0.0007051, 0.002499) | A4 = -0.0007747 (-0.0009405, -0.000609) |
| n = -47.11 (-50.94, -43.28)         | p = -7.918 (-2.797e+05, 2.797e+05)      |
| r = -4.96 (-7.359, -2.562)          | $\sigma$ = 21.59 (17.11, 26.07)         |
| <b>t1 = 78.4 (70.48, 86.33)</b>     |                                         |

Goodness of fit:

SSE: 7.801e-07    R-square: 0.9954    Adjusted R-square: 0.9953    RMSE: 5.689e-05

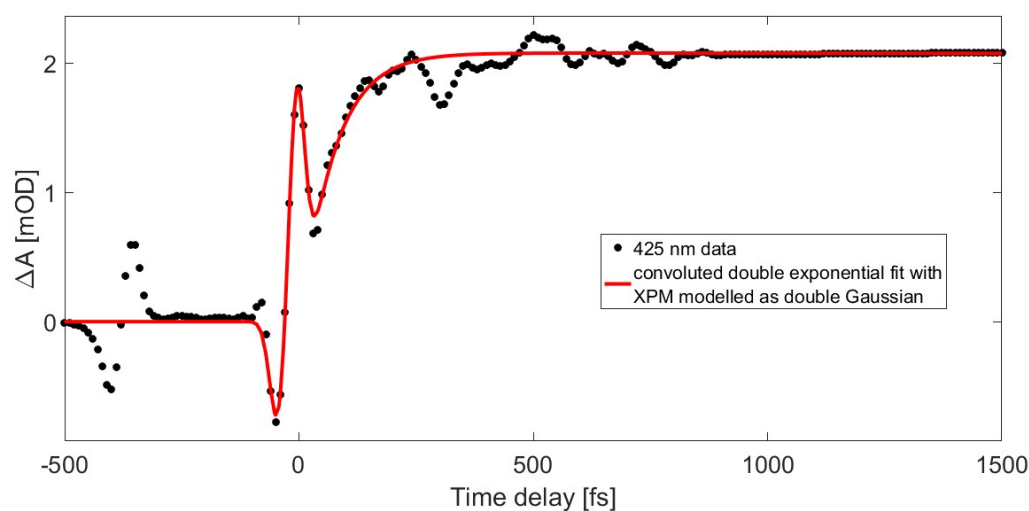

Figure S7

General model:

$$f(t) = A_1 e^{-\frac{\left(t-p-\frac{\sigma^2}{2t_1}\right)}{t_1}} \left[ 1 + \operatorname{erf}\left(\frac{t-p-\frac{1}{t_1}\sigma^2}{\sqrt{2}\sigma}\right) \right] + A_2 e^{-\frac{\left(t-p-\frac{\sigma^2}{2 \cdot 10^6}\right)}{10^6}} \left[ 1 + \operatorname{erf}\left(\frac{t-p-\frac{1}{10^6}\sigma^2}{\sqrt{2}\sigma}\right) \right] + A_3 e^{-\frac{(t-r)^2}{2\sigma^2}} + A_4 e^{-\frac{(t-n)^2}{2\sigma^2}}$$

Coefficients (with 95% confidence bounds):

A1 = -0.0009393 (-0.05372, 0.05184)    A2 = 0.000975 (0.0009683, 0.0009818)  
 A3 = -0.01123 (-316.9, 316.9)            A4 = 0.01201 (-316.9, 316.9)  
 n = -13.97 (-2.436e+04, 2.433e+04)    p = 19.84 (-4415, 4455)  
 r = -15.79 (-2.547e+04, 2.544e+04)     $\sigma$  = 26.4 (-544.6, 597.4)  
**t1 = 82.4 (68.44, 96.35)**

Goodness of fit:

SSE: 1.273e-06    R-square: 0.9914    Adjusted R-square: 0.9911    RMSE: 7.267e-05

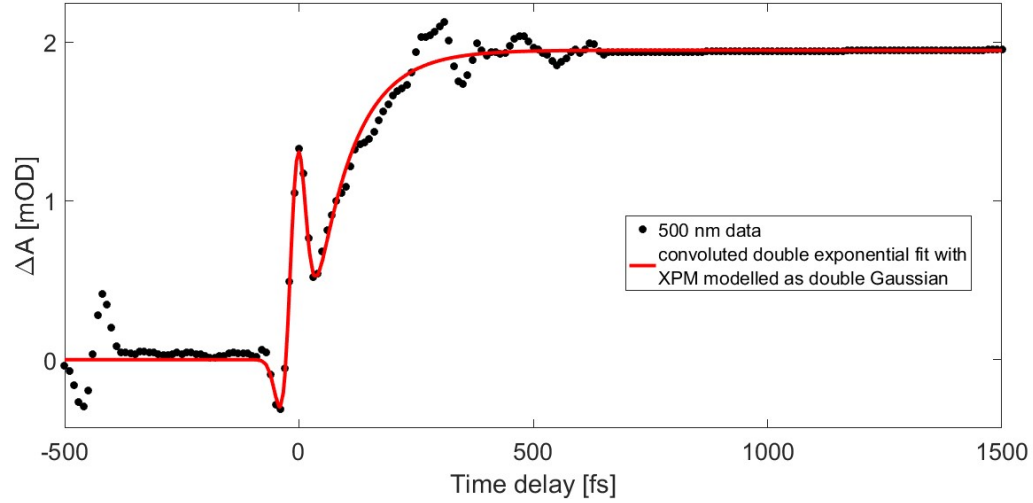

**Figure S8**

General model:

$$f(t) = A_1 e^{-\frac{\left(t-p-\frac{\sigma^2}{2t_1}\right)}{t_1}} \left[ 1 + \operatorname{erf}\left(\frac{t-p-\frac{1}{t_1}\sigma^2}{\sqrt{2}\sigma}\right) \right] + A_2 e^{-\frac{\left(t-p-\frac{\sigma^2}{2 \cdot 10^6}\right)}{10^6}} \left[ 1 + \operatorname{erf}\left(\frac{t-p-\frac{1}{10^6}\sigma^2}{\sqrt{2}\sigma}\right) \right] + A_3 e^{-\frac{(t-r)^2}{2\sigma^2}} + A_4 e^{-\frac{(t-n)^2}{2\sigma^2}}$$

Coefficients (with 95% confidence bounds):

A1 = -0.0003732 (-0.0004635, -0.000283)    A2 = 0.0008317 (0.000826, 0.0008375)  
 A3 = -0.000227 (-0.0003128, -0.0001413)    A4 = 0.0007324 (0.0006103, 0.0008544)  
 n = 4.683 (1.515, 7.851)                            p = 39.37 (31.42, 47.33)  
 r = -45.3 (-54.89, -35.72)                         $\sigma$  = 21.36 (17.14, 25.59)  
**t1 = 125.4 (98.21, 152.6)**

Goodness of fit:

SSE: 1.23e-06    R-square: 0.9705    Adjusted R-square: 0.9693    RMSE: 7.727e-05



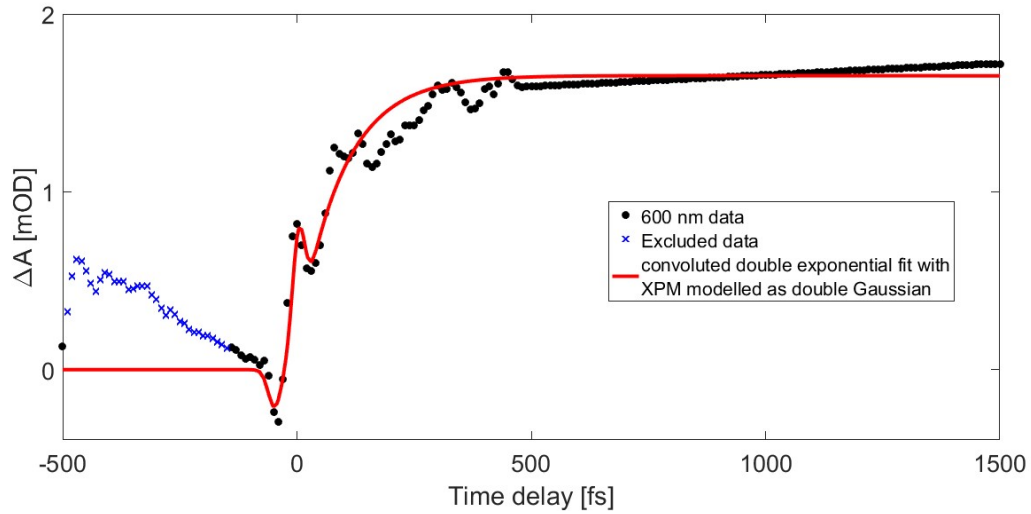

Figure S9

Finally, in order to reduce the noise in kinetic profiles we integrated the signal in 400-500 nm wavelength range. By doing so we also obtained better contrast for coherent artifacts. The XPM superimposed on the initial rise of the time trace was accounted for by two Gaussian functions of opposite sign. It is reasonable to assume that TPA, being stronger at shorter wavelengths, also contributes to this artifact additionally changing the shape and ratio between positive and negative amplitudes of XPM. For negative delay times we also observe a weaker replica of the XPM artifact visible at time zero, shifted in time due to dispersion of the first cuvette window.

General model:

$$f(t) = A_1 e^{-\frac{\left(t-p-\frac{\sigma^2}{2t_1}\right)}{t_1}} \left[ 1 + \operatorname{erf}\left(\frac{t-p-\frac{1}{t_1}\sigma^2}{\sqrt{2}\sigma}\right) \right] + A_2 e^{-\frac{\left(t-p-\frac{\sigma^2}{2 \cdot 10^6}\right)}{10^6}} \left[ 1 + \operatorname{erf}\left(\frac{t-p-\frac{1}{10^6}\sigma^2}{\sqrt{2}\sigma}\right) \right] + A_3 e^{-\frac{(t-r)^2}{2\sigma^2}} + A_4 e^{-\frac{(t-n)^2}{2\sigma^2}}$$

Coefficients (with 95% confidence bounds):

$$\begin{array}{ll} A1 = -118.2 (-140.1, -96.41) & A2 = 199.8 (199.1, 200.6) \\ A3 = -108.7 (-133, -84.33) & A4 = 314.7 (298.4, 331) \\ n = -2.628 (-4.677, -0.5791) & p = 28.17 (18.37, 37.98) \\ r = -43.34 (-49.82, -36.86) & \sigma = 23.98 (20.97, 26.98) \\ \mathbf{t1 = 110 (98.23, 121.8)} \end{array}$$

Goodness of fit:

$$\text{SSE: } 2.085\text{e}+04 \quad \text{R-square: } 0.9966 \quad \text{Adjusted R-square: } 0.9965 \quad \text{RMSE: } 9.302$$

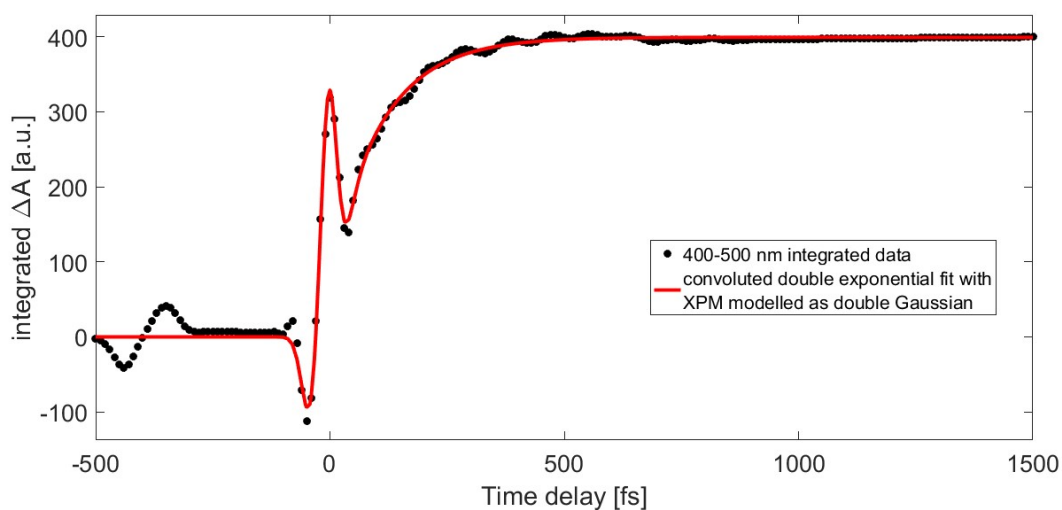

Figure S10

## 2. Intensity dependence of transient absorption spectra

In order to clarify the origin of the signal at longer wavelengths that we attributed to solvated electrons we measured excitation intensity dependence on the transient absorption spectra for both the sample and pure solvent at fixed delay of 10 ps that show quadratic dependence in the case of pure solvent as expected for two-photon ionization. Intensity dependence for sample is almost linear suggesting that it stems from free electrons resulting from radical cation formation which is one photon process as is shown in Figure 8. with only minor contribution of two-photon ionization of solvent molecules.

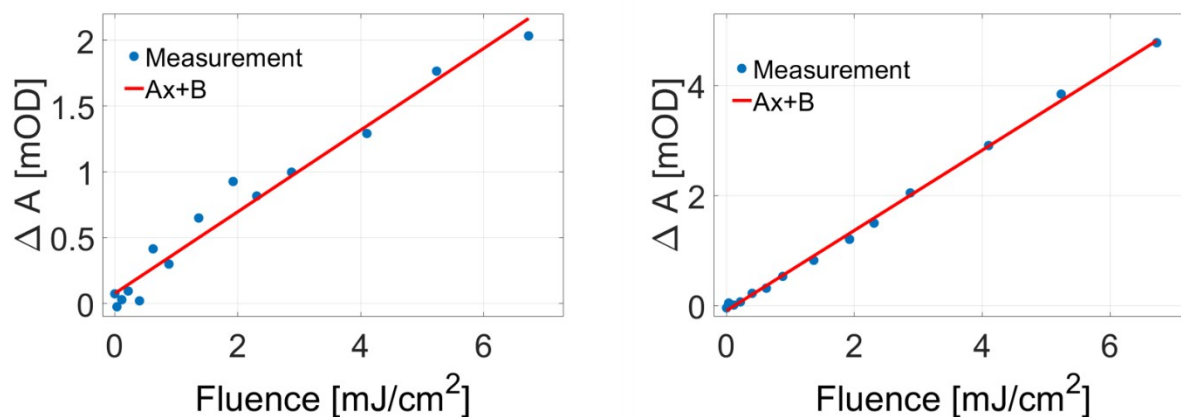

Figure S11 Excitation intensity dependence on the transient absorption spectra of adamantylphenol at fixed delay of 10 ps at 425 nm (left) and 600 nm (right) that show linear dependence.

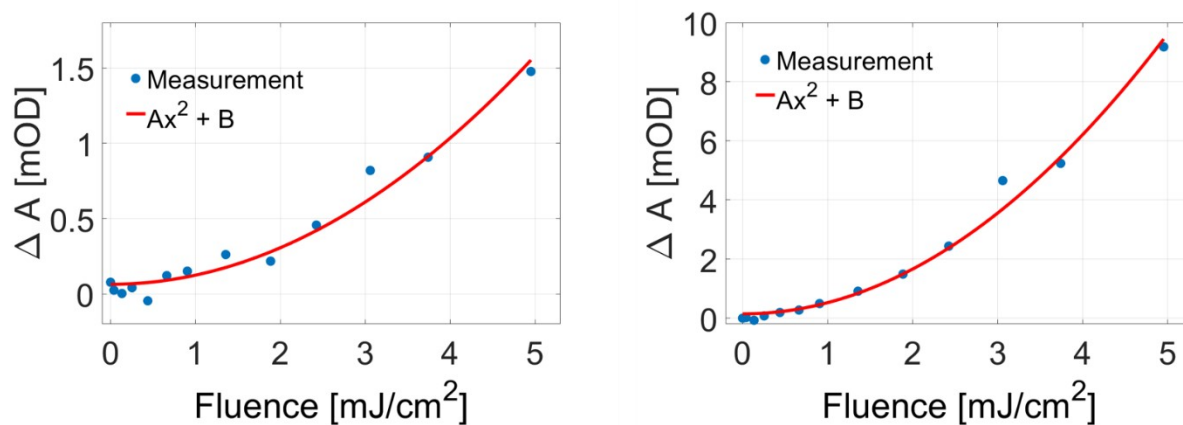

**Figure S12** Excitation intensity dependence on the transient absorption spectra in pure solvent at fixed delay of 10 ps at 425 nm (left) and 600 nm (right) that show quadratic dependence as expected for two-photon ionization.

### 3. Absorption spectra and transient absorption spectra

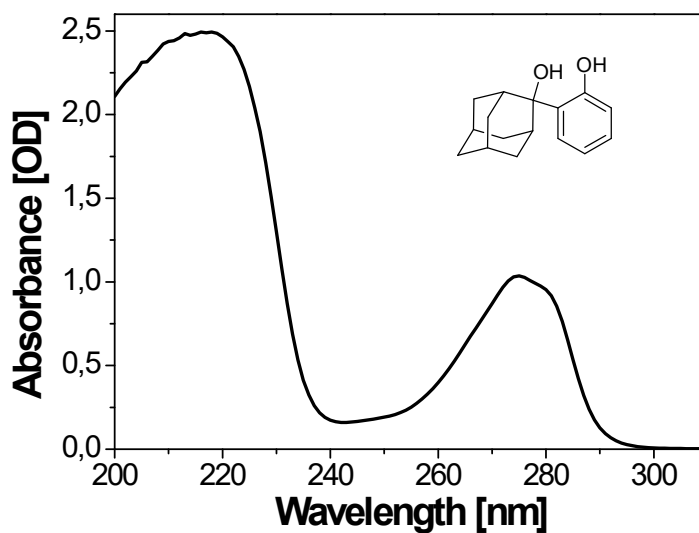

**Figure S13** Absorption spectrum of **3** in  $\text{CH}_3\text{CN}-\text{H}_2\text{O}$  (1:1) (for the path of 1 mm), at concentration  $c = 5.0 \times 10^{-3}$  M that was used for fs-TA experiment with 280 nm sub-20-fs pump pulses from SHG of NOPA.

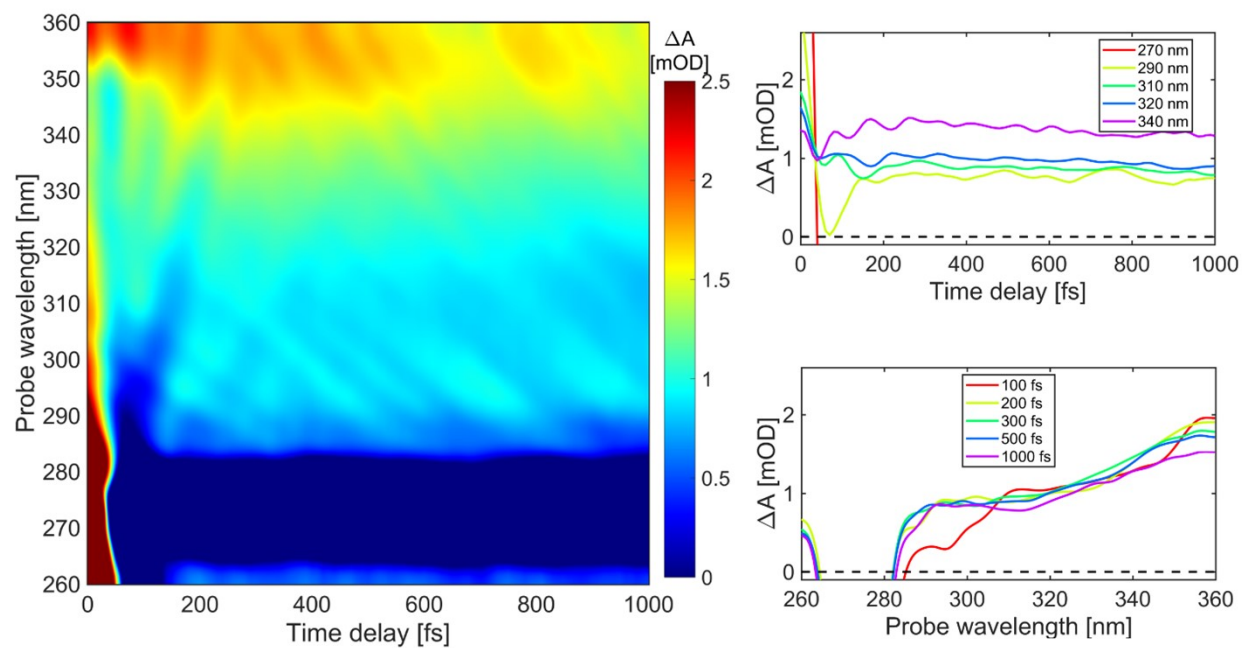

**Figure S14** fs-TA data using sub-20-fs UV NOPA pump pulse and WLC driven by the SH of Ti:sapphire together with spectral and kinetic profiles for the selected wavelengths. Only strong ground state bleach is observed below 285nm.

#### 4. Laser flash photolysis measurements

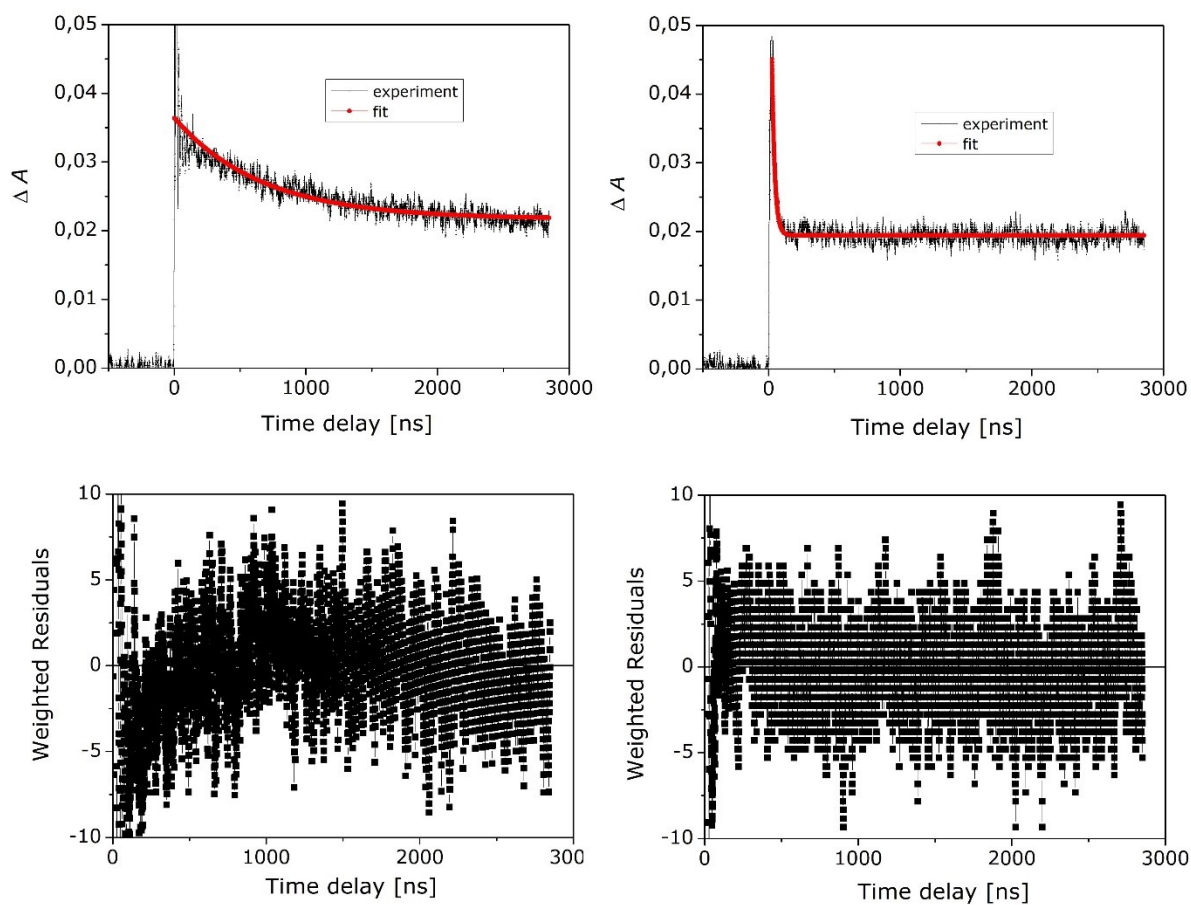

**Figure S15** Nanosecond decay of transient absorption at 400 nm for Ar-purged (left) and  $O_2$ -purged (right)  $CH_3CN-H_2O$  (1:1 v/v) solution of **3** ( $2.0 \times 10^{-4}$  M). The energy of the laser pulse at 266 nm was set to 17 mJ/pulse. The bottom panels correspond to the weighted residuals between the measured value and the calculated according to the single exponential decay model.

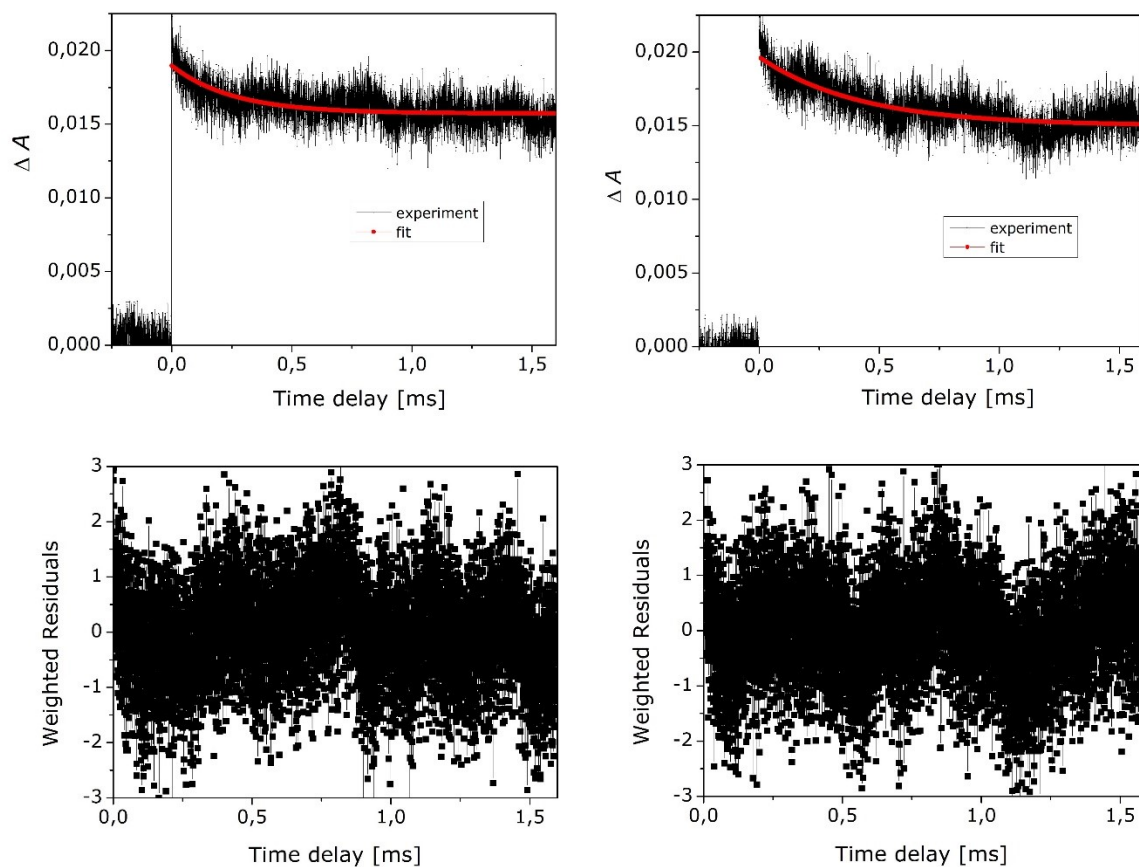

**Figure S16** Millisecond decay of transient absorption at 400 nm for Ar-purged (left) and  $O_2$ -purged (right)  $CH_3CN-H_2O$  (1:1 v/v) solution of **3** ( $2.0 \times 10^{-4}$  M). The energy of the laser pulse at 266 nm was set to 17 mJ/pulse. The bottom panels correspond to the weighted residuals between the measured value and the calculated according to the single exponential decay model.

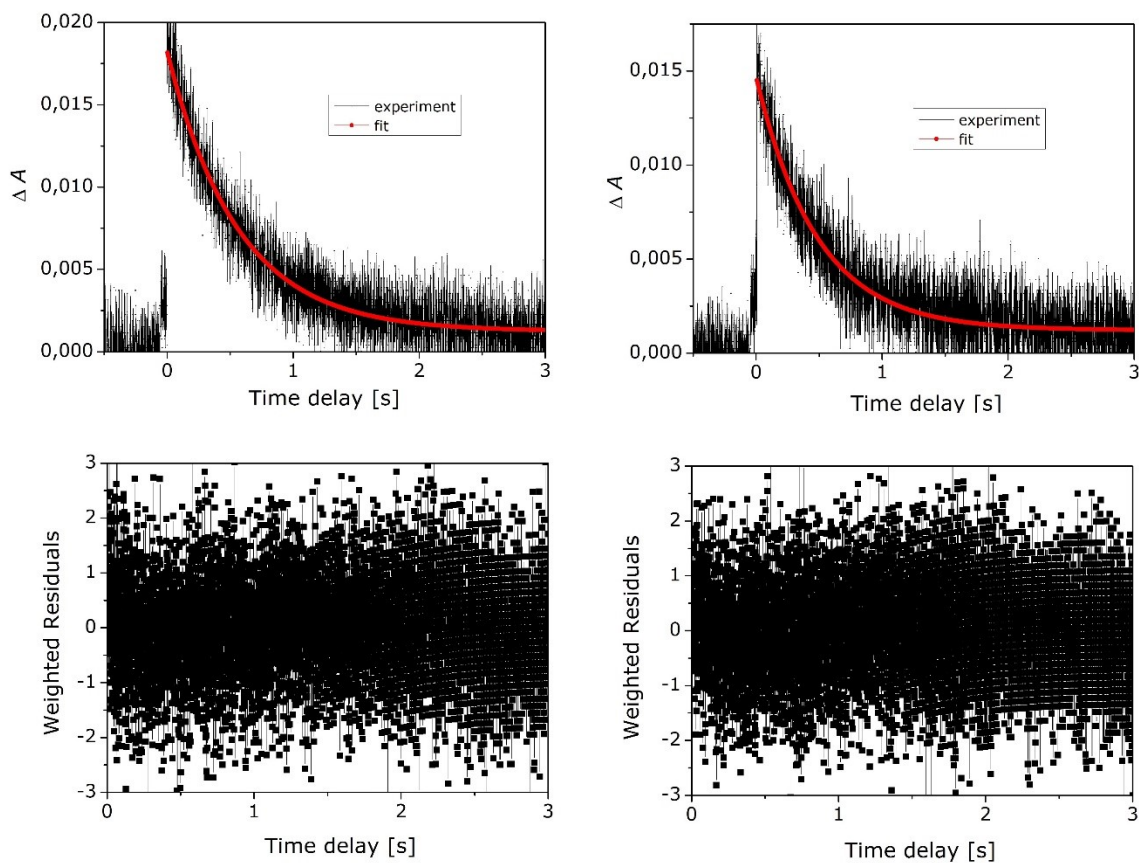

**Figure S17** Decay of transient absorption at 420 nm for Ar-purged (left) and O<sub>2</sub>-purged CH<sub>3</sub>CN-H<sub>2</sub>O (1:1 v/v) solution of **3** ( $2.0 \times 10^{-4}$  M). The energy of the laser pulse at 266 nm was set to 17 mJ/pulse. The bottom panels correspond to the weighted residuals between the measured value and the calculated according to the single exponential decay model.

## 5. Fluorescence upconversion measurements

### 5.1 Instrument response function

Instrument response function measurement was taken with identical experimental conditions prior to FIUC measurements of adamantylphenol.

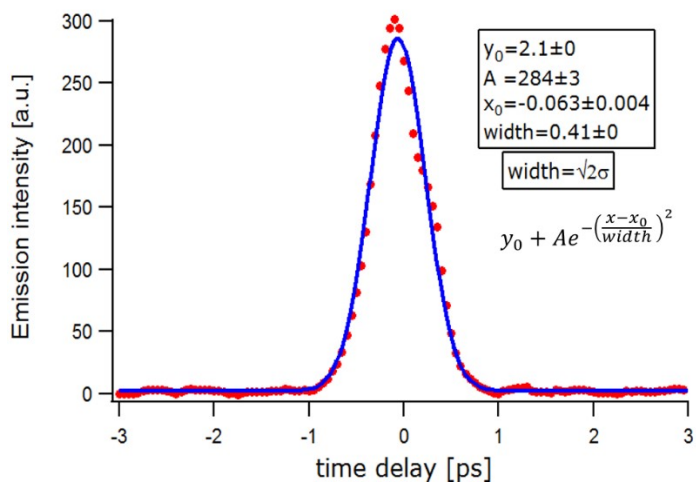

**Figure S18.** IRF of FIUC measurements with 272 nm excitation wavelength. IRF is equal to  $2\sqrt{2\ln 2}\sigma = 680$  fs.

## 5.2 Global analysis of FIUC data

The spectro-temporal signal can be describe by three components: the first describes a rise of the signal in 0.46 ps, the second describe a decay of ca, 1/3 of the total signal. The last component is set to 2 ns (infinity in our spanned time window). The presence of the first component is necessary because the rise of the signal is much slower than the measured IRF (630 fs). If we carry out the global fit procedure with free IRF we can remove the 0.5 ps component but the IRF would be 1.2 ps (and the time zero would be accordingly shifted). It is noteworthy that the first component equalizes the sum of the other two components. This speaks for a signal, which is delayed by 0.5 ps and is not directly populated upon excitation.



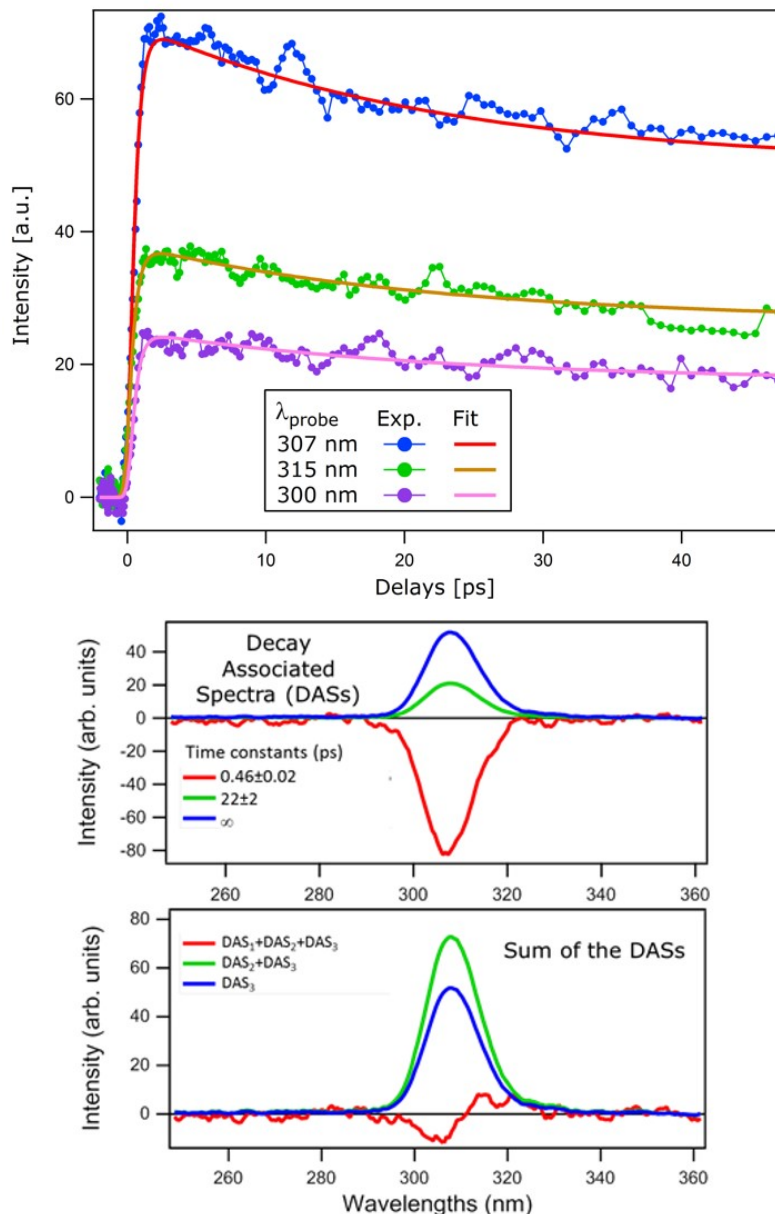

**Figure S19.** Results of global analysis using fixed value of 0.68 ps for the IRF.

Since FIUC measurements could not be performed at magic angle, it is possible to ascribe 22 ps decay to rotational anisotropy decay. Actually, 22 ps is too short for such processes (typically 100-200 ps in conventional solvents) but due to the limited scan range of 50 ps we cannot distinguish between 20 ps and 100 ps. In global analysis, the effect to change the time constant would be only to change the relative amplitude of the second and third DAS component (see Figure S19). To check this explanation, we carried out an analysis where we changed the second component in order to obtain a ratio 2:1 between the second and the third component. Indeed, a pure rotational anisotropy would induce a reduction by 2/3 of the initial signal with respect to the fully randomized one. The outcome of this analysis is shown in Figure S20. Under the 2:1 condition, the second time constant changed to 90 ps, which is compatible with a rotational diffusion process

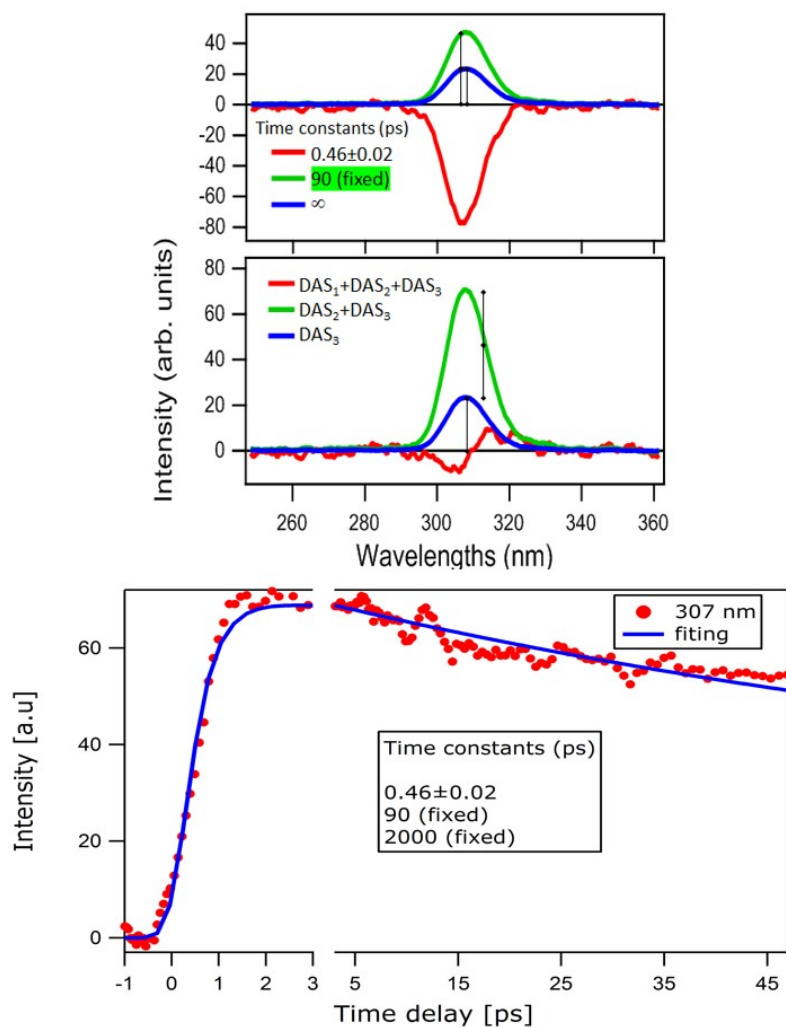

**Figure S20.** Results of global analysis with imposed rotational anisotropy decay.

### 5.3 FIUC of anisole molecule

In order to verify both IRF and the presence of the 0.5 ps rise in the adamantylphenol signal we performed additional FIUC measurements using anisole as a reference system. Only the two long components were necessary for the fitting of data. Any attempts to add a rise component or to impose 1 ps IRF were rejected by the fitting. When the IRF parameter was set free the fitting procedure gives  $0.79 \pm 0.08$  ps.

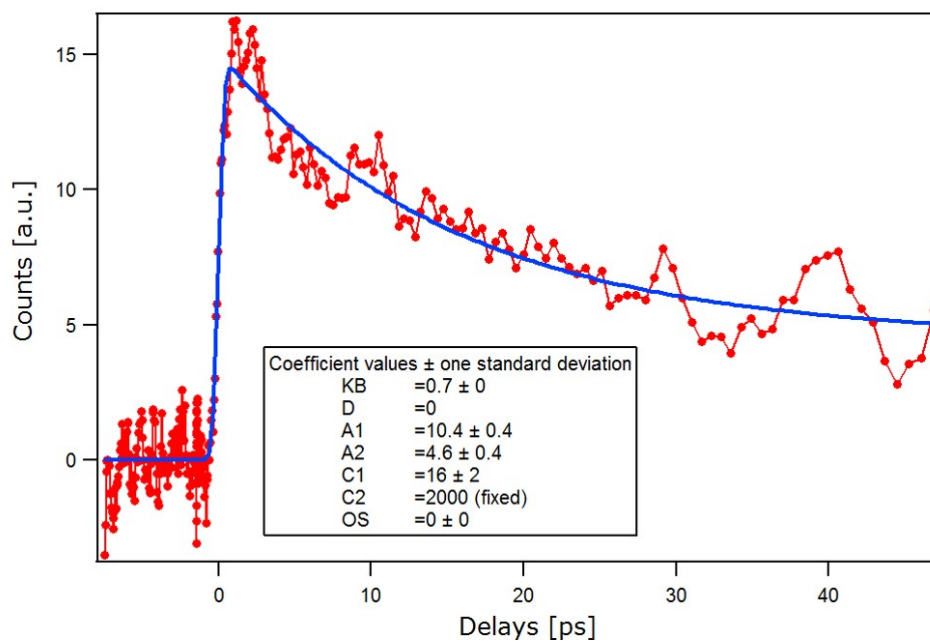

**Figure S21.** Fluorescence intensity kinetics of anisole in acetonitrile used as a reference molecule. IRF is represented by KB parameter.

## 6. Time-correlated single photon counting (TC-SPC) measurements

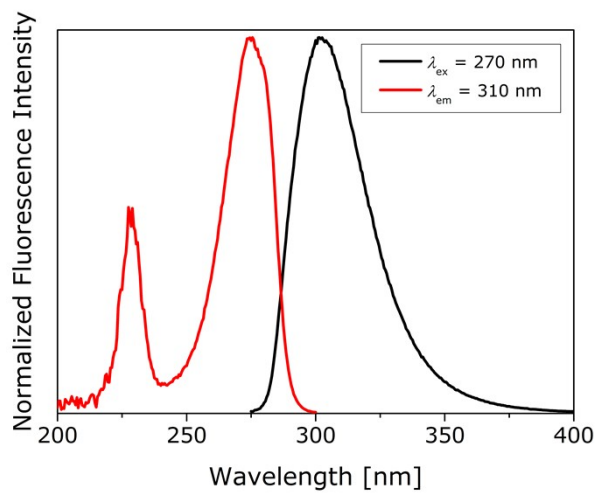

**Figure S22.** Normalized excitation and emission spectra of **3** in  $\text{CH}_3\text{CN-H}_2\text{O}$  (1:1).

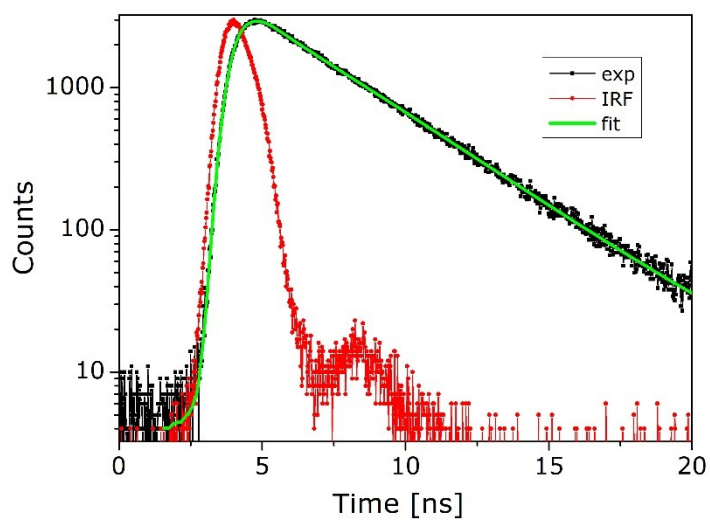

Figure S23. Decay of fluorescence of **3** in CH<sub>3</sub>CN-H<sub>2</sub>O (1:1) at 310 nm ( $\lambda_{\text{exc}} = 280$  nm).

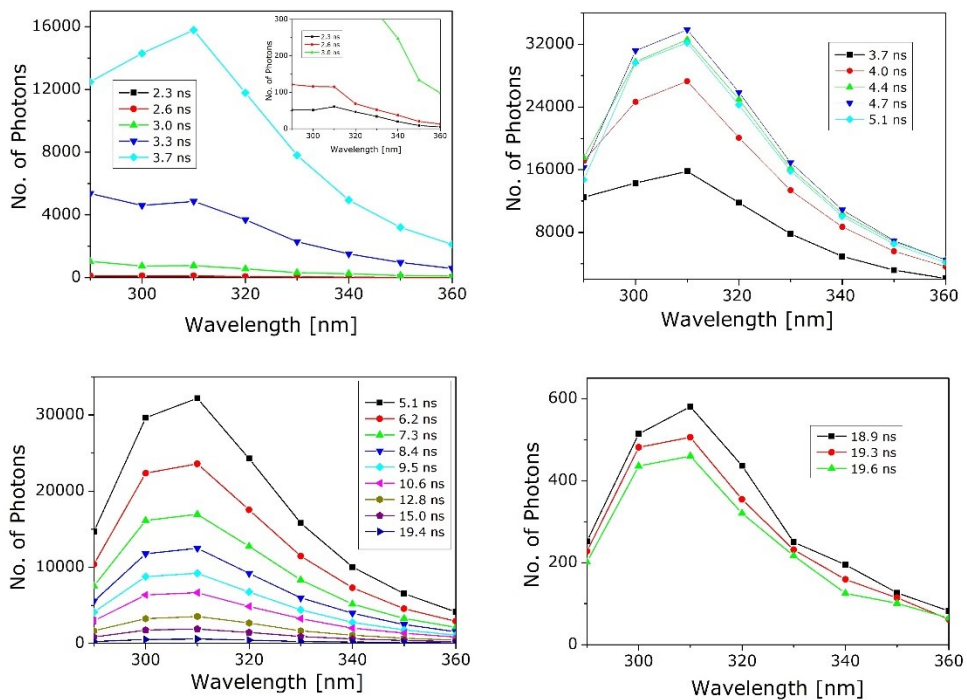

Figure S24. Time-resolved emission spectra ( $\lambda_{\text{ex}} = 280$  nm) of **3** in CH<sub>3</sub>CN-H<sub>2</sub>O (1:1).

## 7. Computations

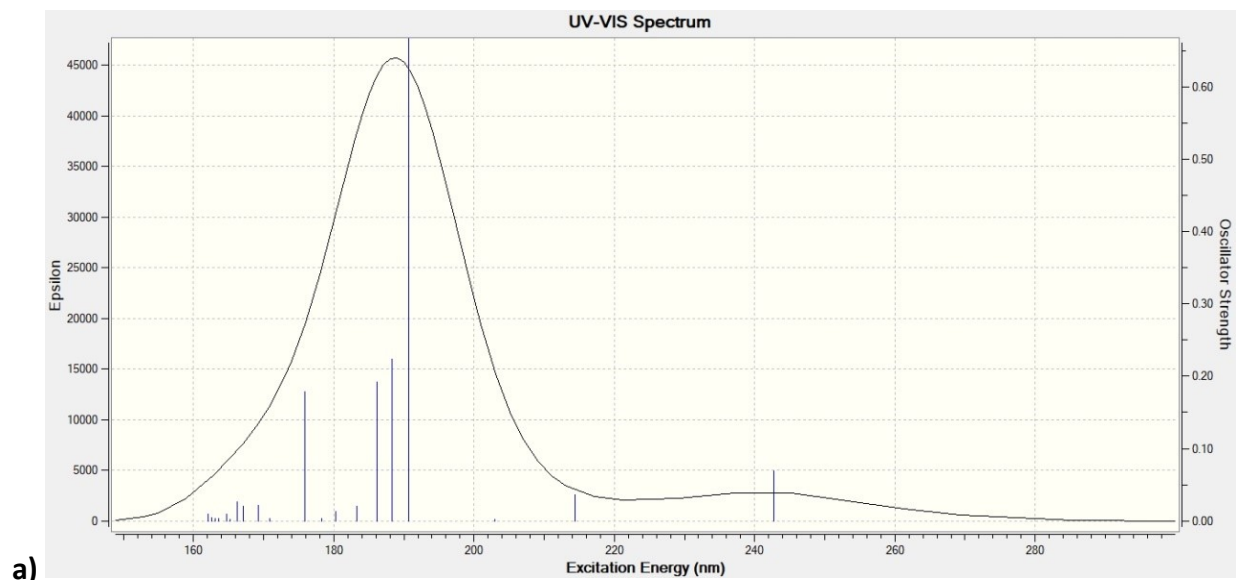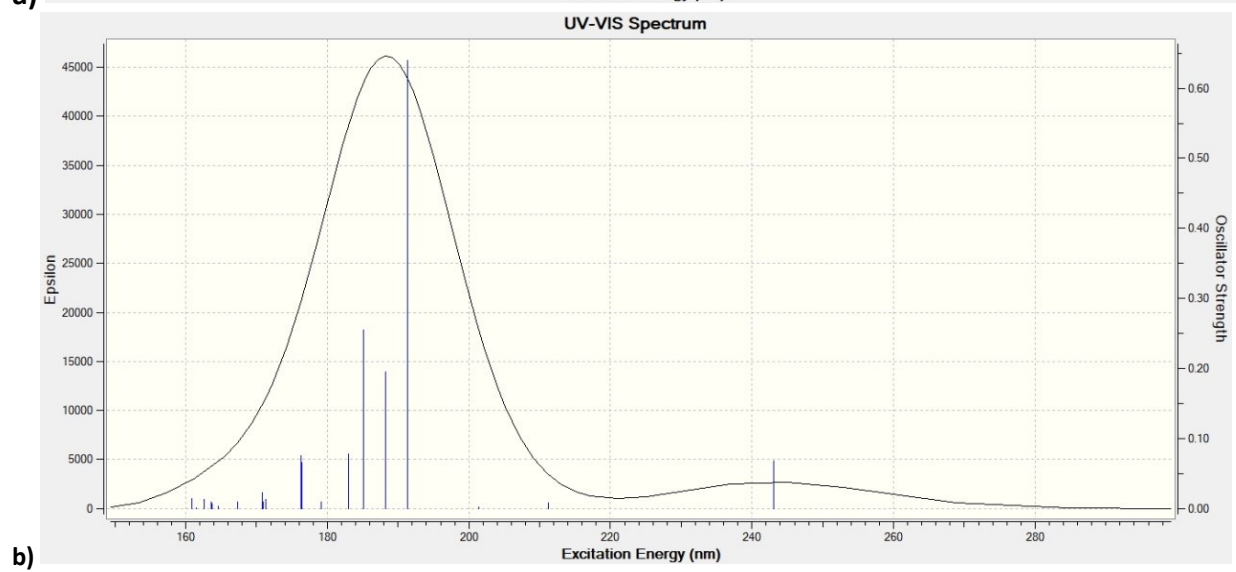

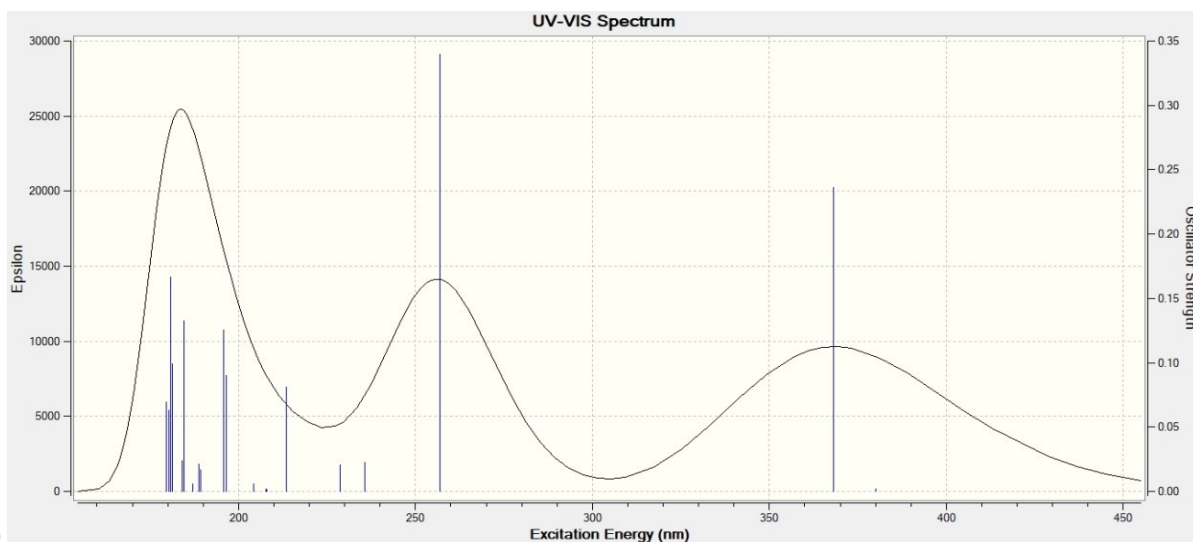

c)

**Figure S25.** Simulated spectra of  $3(S_0)$  (a),  $3'(S_0)$  (b) and  $4(S_0)$  (c) computed at the PCM(water)/TD- $\omega$ B97XD/6-311++G(d,p) level of theory.

**Table S1.** Vertical excitation of singlet  $3(S_0)$ ,  $3'(S_0)$  and  $4(S_0)$  computed at the PCM(water)/TD- $\omega$ B97XD/6-311++G(d,p) level of theory.

| $3(S_0)$         |           |           |           |                       |
|------------------|-----------|-----------|-----------|-----------------------|
| Excited State 1: | Singlet-A | 5.1087 eV | 242.69 nm | f=0.0686 <S**2>=0.000 |
| 65 -> 72         | 0.18262   |           |           |                       |
| 65 -> 73         | -0.15138  |           |           |                       |
| 66 -> 67         | 0.16718   |           |           |                       |
| 66 -> 68         | 0.51394   |           |           |                       |
| 66 -> 69         | -0.20974  |           |           |                       |
| 66 -> 70         | 0.10196   |           |           |                       |
| 66 -> 71         | -0.18071  |           |           |                       |
| 66 -> 72         | 0.12491   |           |           |                       |
| Excited State 2: | Singlet-A | 5.7839 eV | 214.36 nm | f=0.0363 <S**2>=0.000 |
| 65 -> 68         | -0.283477 |           |           |                       |
| 65 -> 69         | 0.11648   |           |           |                       |
| 65 -> 71         | 0.10547   |           |           |                       |
| 66 -> 67         | -0.12447  |           |           |                       |
| 66 -> 68         | -0.11290  |           |           |                       |
| 66 -> 70         | 0.22629   |           |           |                       |
| 66 -> 72         | 0.40683   |           |           |                       |
| 66 -> 73         | -0.28317  |           |           |                       |
| 66 -> 74         | -0.10558  |           |           |                       |
| 66 -> 75         | -0.12508  |           |           |                       |
| Excited State 3: | Singlet-A | 6.1077 eV | 203.00 nm | f=0.0025 <S**2>=0.000 |
| 66 -> 67         | 0.44139   |           |           |                       |
| 66 -> 68         | -0.21640  |           |           |                       |
| 66 -> 69         | -0.32170  |           |           |                       |
| 66 -> 71         | 0.15996   |           |           |                       |
| 66 -> 73         | -0.15506  |           |           |                       |

|                  |           |           |                                 |
|------------------|-----------|-----------|---------------------------------|
| 66 -> 79         | 0.10660   |           |                                 |
| 66 -> 80         | -0.15515  |           |                                 |
| 66 -> 87         | 0.12105   |           |                                 |
| Excited State 4: | Singlet-A | 6.5006 eV | 190.73 nm f=0.6735 <S**2>=0.000 |
| 65 -> 67         | 0.20094   |           |                                 |
| 65 -> 68         | 0.38317   |           |                                 |
| 65 -> 69         | -0.18439  |           |                                 |
| 65 -> 71         | -0.14889  |           |                                 |
| 65 -> 72         | -0.17980  |           |                                 |
| 65 -> 73         | 0.14288   |           |                                 |
| 66 -> 68         | 0.16577   |           |                                 |
| 66 -> 72         | 0.22198   |           |                                 |
| 66 -> 73         | -0.20566  |           |                                 |
| Excited State 5: | Singlet-A | 6.5834 eV | 188.33 nm f=0.2238 <S**2>=0.000 |
| 65 -> 68         | 0.29816   |           |                                 |
| 65 -> 70         | 0.22921   |           |                                 |
| 65 -> 72         | 0.29211   |           |                                 |
| 65 -> 73         | -0.17491  |           |                                 |
| 66 -> 68         | -0.28954  |           |                                 |
| 66 -> 69         | -0.10111  |           |                                 |
| 66 -> 70         | 0.15612   |           |                                 |
| 66 -> 71         | -0.12467  |           |                                 |
| 66 -> 72         | 0.18275   |           |                                 |
| Excited State 6: | Singlet-A | 6.6599 eV | 186.17 nm f=0.1924 <S**2>=0.000 |
| 65 -> 70         | 0.17454   |           |                                 |
| 65 -> 72         | 0.24766   |           |                                 |
| 65 -> 73         | -0.16263  |           |                                 |
| 66 -> 69         | 0.18771   |           |                                 |
| 66 -> 70         | -0.20373  |           |                                 |
| 66 -> 71         | 0.33314   |           |                                 |
| 66 -> 73         | -0.25941  |           |                                 |
| 66 -> 74         | 0.10692   |           |                                 |
| 66 -> 77         | 0.11473   |           |                                 |
| Excited State 7: | Singlet-A | 6.7638 eV | 183.31 nm f=0.0199 <S**2>=0.000 |
| 65 -> 67         | -0.24540  |           |                                 |
| 65 -> 68         | 0.17010   |           |                                 |
| 65 -> 69         | 0.17996   |           |                                 |
| 66 -> 69         | -0.11654  |           |                                 |
| 66 -> 70         | 0.24439   |           |                                 |
| 66 -> 71         | 0.30911   |           |                                 |
| 66 -> 74         | 0.21175   |           |                                 |
| 66 -> 75         | 0.13174   |           |                                 |
| 66 -> 77         | -0.15307  |           |                                 |
| Excited State 8: | Singlet-A | 6.8752 eV | 180.33 nm f=0.0132 <S**2>=0.000 |
| 65 -> 67         | 0.34962   |           |                                 |
| 65 -> 68         | -0.14467  |           |                                 |
| 65 -> 69         | -0.26185  |           |                                 |
| 65 -> 80         | -0.12008  |           |                                 |
| 66 -> 70         | 0.27748   |           |                                 |
| 66 -> 71         | 0.20187   |           |                                 |
| 66 -> 77         | -0.24350  |           |                                 |

66 -> 84 0.10756  
 Excited State 9: Singlet-A 6.9561 eV 178.24 nm f=0.0039 <S\*\*2>=0.000  
 65 -> 67 -0.11889  
 65 -> 68 0.12482  
 66 -> 67 0.14771  
 66 -> 69 0.31207  
 66 -> 70 0.18337  
 66 -> 71 -0.14322  
 66 -> 72 -0.20247  
 66 -> 73 -0.18267  
 66 -> 74 -0.23626  
 66 -> 77 -0.23886  
 66 -> 80 -0.15244  
 Excited State 10: Singlet-A 7.0514 eV 175.83 nm f=0.1781 <S\*\*2>=0.000  
 61 -> 67 0.13613  
 61 -> 68 0.28181  
 61 -> 69 -0.13513  
 64 -> 67 0.22713  
 64 -> 68 0.42523  
 64 -> 69 -0.18396  
 64 -> 71 -0.13788  
 Excited State 11: Singlet-A 7.2542 eV 170.91 nm f=0.0037 <S\*\*2>=0.000  
 66 -> 67 0.25364  
 66 -> 69 0.10128  
 66 -> 74 -0.12555  
 66 -> 75 0.27907  
 66 -> 76 -0.27006  
 66 -> 77 0.10211  
 66 -> 78 0.10481  
 66 -> 80 0.30641  
 66 -> 85 -0.13211  
 66 -> 87 -0.13786  
 66 -> 91 -0.10806  
 Excited State 12: Singlet-A 7.3271 eV 169.21 nm f=0.0214 <S\*\*2>=0.000  
 61 -> 70 -0.13078  
 64 -> 67 0.16672  
 64 -> 68 -0.14207  
 64 -> 70 -0.11157  
 65 -> 67 0.11754  
 65 -> 68 0.10175  
 65 -> 69 0.23738  
 65 -> 70 -0.23529  
 65 -> 73 -0.23757  
 65 -> 75 -0.10061  
 66 -> 74 0.14129  
 66 -> 76 0.13957  
 66 -> 79 -0.11357  
 Excited State 13: Singlet-A 7.4212 eV 167.07 nm f=0.0204 <S\*\*2>=0.000  
 61 -> 72 -0.11630  
 64 -> 70 -0.13696  
 64 -> 72 -0.16005



|                   |           |           |           |          |              |
|-------------------|-----------|-----------|-----------|----------|--------------|
| 65 -> 68          | 0.13340   |           |           |          |              |
| 65 -> 71          | 0.26197   |           |           |          |              |
| 65 -> 74          | 0.12814   |           |           |          |              |
| 66 -> 71          | 0.15442   |           |           |          |              |
| 66 -> 73          | 0.16426   |           |           |          |              |
| 66 -> 74          | -0.25409  |           |           |          |              |
| 66 -> 75          | -0.15151  |           |           |          |              |
| 66 -> 78          | 0.21682   |           |           |          |              |
| 66 -> 79          | 0.17787   |           |           |          |              |
| Excited State 14: | Singlet-A | 7.4573 eV | 166.26 nm | f=0.0259 | <S**2>=0.000 |
| 61 -> 72          | 0.19530   |           |           |          |              |
| 61 -> 73          | -0.14194  |           |           |          |              |
| 63 -> 67          | -0.13802  |           |           |          |              |
| 63 -> 68          | -0.13154  |           |           |          |              |
| 64 -> 70          | 0.17230   |           |           |          |              |
| 64 -> 72          | 0.29671   |           |           |          |              |
| 64 -> 73          | -0.19253  |           |           |          |              |
| 65 -> 69          | 0.10227   |           |           |          |              |
| 65 -> 70          | -0.10079  |           |           |          |              |
| 65 -> 73          | -0.15364  |           |           |          |              |
| 66 -> 73          | 0.10313   |           |           |          |              |
| 66 -> 74          | -0.10137  |           |           |          |              |
| 66 -> 75          | -0.11640  |           |           |          |              |
| 66 -> 78          | 0.12806   |           |           |          |              |
| Excited State 15: | Singlet-A | 7.5018 eV | 165.27 nm | f=0.0023 | <S**2>=0.000 |
| 60 -> 68          | 0.14916   |           |           |          |              |
| 62 -> 68          | 0.12073   |           |           |          |              |
| 63 -> 67          | 0.34432   |           |           |          |              |
| 63 -> 68          | 0.32119   |           |           |          |              |
| 66 -> 67          | 0.11612   |           |           |          |              |
| 66 -> 73          | 0.14064   |           |           |          |              |
| 66 -> 75          | -0.14146  |           |           |          |              |
| 66 -> 78          | 0.12643   |           |           |          |              |
| Excited State 16: | Singlet-A | 7.5292 eV | 164.67 nm | f=0.0098 | <S**2>=0.000 |
| 63 -> 67          | 0.19835   |           |           |          |              |
| 63 -> 68          | 0.11297   |           |           |          |              |
| 64 -> 67          | -0.17400  |           |           |          |              |
| 65 -> 67          | -0.10996  |           |           |          |              |
| 65 -> 68          | 0.12119   |           |           |          |              |
| 65 -> 70          | -0.10651  |           |           |          |              |
| 65 -> 71          | 0.34525   |           |           |          |              |
| 65 -> 73          | -0.11673  |           |           |          |              |
| 65 -> 74          | 0.14850   |           |           |          |              |
| 66 -> 73          | -0.11564  |           |           |          |              |
| 66 -> 74          | 0.14847   |           |           |          |              |
| 66 -> 75          | 0.13261   |           |           |          |              |
| 66 -> 78          | -0.15470  |           |           |          |              |
| Excited State 17: | Singlet-A | 7.5808 eV | 163.55 nm | f=0.0039 | <S**2>=0.000 |
| 63 -> 68          | -0.15469  |           |           |          |              |
| 65 -> 70          | 0.12542   |           |           |          |              |
| 65 -> 71          | 0.23223   |           |           |          |              |

|                   |           |           |           |          |              |
|-------------------|-----------|-----------|-----------|----------|--------------|
| 65 -> 73          | 0.11150   |           |           |          |              |
| 65 -> 74          | 0.13387   |           |           |          |              |
| 66 -> 67          | 0.21320   |           |           |          |              |
| 66 -> 69          | 0.14707   |           |           |          |              |
| 66 -> 72          | 0.13206   |           |           |          |              |
| 66 -> 74          | 0.11239   |           |           |          |              |
| 66 -> 76          | 0.28533   |           |           |          |              |
| 66 -> 78          | 0.12865   |           |           |          |              |
| 66 -> 79          | -0.16330  |           |           |          |              |
| Excited State 18: | Singlet-A | 7.6011 eV | 163.11 nm | f=0.0029 | <S**2>=0.000 |
| 61 -> 67          | 0.12001   |           |           |          |              |
| 63 -> 67          | 0.23519   |           |           |          |              |
| 63 -> 69          | 0.15306   |           |           |          |              |
| 64 -> 67          | -0.15972  |           |           |          |              |
| 65 -> 67          | -0.10886  |           |           |          |              |
| 65 -> 69          | -0.13605  |           |           |          |              |
| 65 -> 70          | -0.19323  |           |           |          |              |
| 65 -> 71          | -0.18505  |           |           |          |              |
| 65 -> 72          | 0.14640   |           |           |          |              |
| 65 -> 77          | 0.20131   |           |           |          |              |
| 66 -> 76          | 0.16363   |           |           |          |              |
| 66 -> 78          | 0.13182   |           |           |          |              |
| Excited State 19: | Singlet-A | 7.6282 eV | 162.53 nm | f=0.0040 | <S**2>=0.000 |
| 63 -> 68          | 0.12428   |           |           |          |              |
| 63 -> 69          | -0.11100  |           |           |          |              |
| 65 -> 69          | 0.11178   |           |           |          |              |
| 66 -> 67          | -0.14558  |           |           |          |              |
| 66 -> 74          | -0.20689  |           |           |          |              |
| 66 -> 75          | 0.34096   |           |           |          |              |
| 66 -> 76          | 0.26619   |           |           |          |              |
| 66 -> 79          | 0.14981   |           |           |          |              |
| 66 -> 81          | -0.17845  |           |           |          |              |
| 66 -> 82          | 0.13634   |           |           |          |              |
| 66 -> 87          | 0.11219   |           |           |          |              |
| Excited State 20: | Singlet-A | 7.6470 eV | 162.13 nm | f=0.0092 | <S**2>=0.000 |
| 62 -> 67          | 0.39720   |           |           |          |              |
| 62 -> 68          | 0.12847   |           |           |          |              |
| 62 -> 69          | 0.10331   |           |           |          |              |
| 63 -> 67          | -0.21446  |           |           |          |              |
| 63 -> 69          | -0.16449  |           |           |          |              |
| 65 -> 69          | -0.12222  |           |           |          |              |
| 65 -> 72          | 0.18490   |           |           |          |              |
| 65 -> 73          | 0.11608   |           |           |          |              |
| 65 -> 77          | 0.12134   |           |           |          |              |
| 65 -> 80          | 0.10649   |           |           |          |              |

---

**3'(S<sub>0</sub>)**

|                  |           |           |           |          |              |
|------------------|-----------|-----------|-----------|----------|--------------|
| Excited State 1: | Singlet-A | 5.0995 eV | 243.13 nm | f=0.0675 | <S**2>=0.000 |
| 65 -> 73         | 0.15256   |           |           |          |              |
| 65 -> 74         | 0.19317   |           |           |          |              |

---

---

|                  |           |           |           |          |              |
|------------------|-----------|-----------|-----------|----------|--------------|
| 66 -> 67         | -0.25325  |           |           |          |              |
| 66 -> 68         | 0.57219   |           |           |          |              |
| Excited State 2: | Singlet-A | 5.8683 eV | 211.28 nm | f=0.0087 | <S**2>=0.000 |
| 65 -> 67         | -0.19263  |           |           |          |              |
| 65 -> 68         | 0.41669   |           |           |          |              |
| 66 -> 67         | -0.10915  |           |           |          |              |
| 66 -> 71         | 0.16072   |           |           |          |              |
| 66 -> 72         | -0.20314  |           |           |          |              |
| 66 -> 73         | -0.27565  |           |           |          |              |
| 66 -> 74         | -0.31541  |           |           |          |              |
| Excited State 3: | Singlet-A | 6.1549 eV | 201.44 nm | f=0.0016 | <S**2>=0.000 |
| 66 -> 67         | 0.43542   |           |           |          |              |
| 66 -> 68         | 0.20061   |           |           |          |              |
| 66 -> 69         | 0.30906   |           |           |          |              |
| 66 -> 70         | 0.19323   |           |           |          |              |
| 66 -> 74         | -0.13420  |           |           |          |              |
| 66 -> 78         | 0.12510   |           |           |          |              |
| 66 -> 80         | -0.16780  |           |           |          |              |
| Excited State 4: | Singlet-A | 6.4801 eV | 191.33 nm | f=0.6394 | <S**2>=0.000 |
| 65 -> 67         | -0.24549  |           |           |          |              |
| 65 -> 68         | 0.41119   |           |           |          |              |
| 65 -> 74         | -0.11444  |           |           |          |              |
| 66 -> 72         | 0.16839   |           |           |          |              |
| 66 -> 73         | 0.24171   |           |           |          |              |
| 66 -> 74         | 0.28727   |           |           |          |              |
| 66 -> 75         | -0.11811  |           |           |          |              |
| Excited State 5: | Singlet-A | 6.5857 eV | 188.26 nm | f=0.1956 | <S**2>=0.000 |
| 65 -> 67         | -0.13360  |           |           |          |              |
| 65 -> 68         | -0.20975  |           |           |          |              |
| 65 -> 71         | 0.19997   |           |           |          |              |
| 65 -> 72         | -0.17328  |           |           |          |              |
| 65 -> 73         | -0.20600  |           |           |          |              |
| 65 -> 74         | -0.20426  |           |           |          |              |
| 66 -> 68         | 0.21143   |           |           |          |              |
| 66 -> 69         | 0.27955   |           |           |          |              |
| 66 -> 70         | -0.18008  |           |           |          |              |
| 66 -> 72         | -0.15911  |           |           |          |              |
| Excited State 6: | Singlet-A | 6.6969 eV | 185.14 nm | f=0.2546 | <S**2>=0.000 |
| 65 -> 71         | 0.15593   |           |           |          |              |
| 65 -> 72         | -0.14587  |           |           |          |              |
| 65 -> 73         | -0.21562  |           |           |          |              |
| 65 -> 74         | -0.21331  |           |           |          |              |
| 66 -> 68         | 0.10707   |           |           |          |              |
| 66 -> 69         | -0.27985  |           |           |          |              |

---

---

|                   |           |           |                                 |
|-------------------|-----------|-----------|---------------------------------|
| 66 -> 70          | 0.32346   |           |                                 |
| 66 -> 74          | -0.23824  |           |                                 |
| Excited State 7:  | Singlet-A | 6.7772 eV | 182.94 nm f=0.0783 <S**2>=0.000 |
| 65 -> 67          | 0.33259   |           |                                 |
| 65 -> 68          | 0.19870   |           |                                 |
| 65 -> 69          | 0.29945   |           |                                 |
| 65 -> 74          | -0.19803  |           |                                 |
| 65 -> 75          | 0.12017   |           |                                 |
| 65 -> 80          | -0.14156  |           |                                 |
| 66 -> 68          | 0.11899   |           |                                 |
| 66 -> 70          | -0.17858  |           |                                 |
| 66 -> 71          | -0.15733  |           |                                 |
| 66 -> 73          | -0.11217  |           |                                 |
| Excited State 8:  | Singlet-A | 6.9186 eV | 179.20 nm f=0.0100 <S**2>=0.000 |
| 65 -> 67          | 0.18919   |           |                                 |
| 65 -> 69          | 0.17178   |           |                                 |
| 66 -> 70          | 0.17018   |           |                                 |
| 66 -> 71          | 0.42500   |           |                                 |
| 66 -> 72          | -0.13662  |           |                                 |
| 66 -> 73          | 0.18313   |           |                                 |
| 66 -> 75          | -0.11608  |           |                                 |
| 66 -> 76          | 0.12946   |           |                                 |
| 66 -> 77          | -0.25705  |           |                                 |
| 66 -> 83          | -0.11232  |           |                                 |
| Excited State 9:  | Singlet-A | 7.0260 eV | 176.46 nm f=0.0658 <S**2>=0.000 |
| 61 -> 67          | -0.14314  |           |                                 |
| 61 -> 68          | 0.16102   |           |                                 |
| 63 -> 67          | 0.11650   |           |                                 |
| 63 -> 68          | -0.13885  |           |                                 |
| 64 -> 67          | -0.21718  |           |                                 |
| 64 -> 68          | 0.25631   |           |                                 |
| 66 -> 67          | 0.10259   |           |                                 |
| 66 -> 69          | -0.15235  |           |                                 |
| 66 -> 70          | -0.18836  |           |                                 |
| 66 -> 71          | 0.13879   |           |                                 |
| 66 -> 72          | 0.18240   |           |                                 |
| 66 -> 73          | -0.16181  |           |                                 |
| 66 -> 77          | -0.14700  |           |                                 |
| 66 -> 80          | -0.11670  |           |                                 |
| Excited State 10: | Singlet-A | 7.0320 eV | 176.31 nm f=0.0750 <S**2>=0.000 |
| 61 -> 67          | -0.10231  |           |                                 |
| 61 -> 68          | 0.17920   |           |                                 |
| 63 -> 68          | -0.14882  |           |                                 |
| 64 -> 67          | -0.20441  |           |                                 |

---

---

|                   |           |           |           |          |              |
|-------------------|-----------|-----------|-----------|----------|--------------|
| 64 -> 68          | 0.25637   |           |           |          |              |
| 66 -> 69          | 0.20776   |           |           |          |              |
| 66 -> 70          | 0.20345   |           |           |          |              |
| 66 -> 72          | -0.23590  |           |           |          |              |
| 66 -> 73          | 0.12123   |           |           |          |              |
| 66 -> 77          | 0.18222   |           |           |          |              |
| 66 -> 80          | 0.10465   |           |           |          |              |
| Excited State 11: | Singlet-A | 7.2366 eV | 171.33 nm | f=0.0133 | <S**2>=0.000 |
| 55 -> 68          | -0.15961  |           |           |          |              |
| 60 -> 67          | -0.11513  |           |           |          |              |
| 60 -> 68          | 0.24107   |           |           |          |              |
| 61 -> 67          | 0.11821   |           |           |          |              |
| 61 -> 68          | -0.16330  |           |           |          |              |
| 63 -> 67          | -0.20257  |           |           |          |              |
| 63 -> 68          | 0.25887   |           |           |          |              |
| 64 -> 67          | -0.18815  |           |           |          |              |
| 64 -> 68          | 0.33184   |           |           |          |              |
| 66 -> 75          | 0.11665   |           |           |          |              |
| Excited State 12: | Singlet-A | 7.2514 eV | 170.98 nm | f=0.0092 | <S**2>=0.000 |
| 64 -> 68          | -0.20236  |           |           |          |              |
| 65 -> 69          | 0.22270   |           |           |          |              |
| 65 -> 71          | 0.14561   |           |           |          |              |
| 65 -> 72          | -0.13443  |           |           |          |              |
| 65 -> 74          | 0.12322   |           |           |          |              |
| 66 -> 67          | -0.14993  |           |           |          |              |
| 66 -> 68          | -0.11292  |           |           |          |              |
| 66 -> 73          | 0.15888   |           |           |          |              |
| 66 -> 75          | 0.26415   |           |           |          |              |
| 66 -> 80          | -0.21744  |           |           |          |              |
| Excited State 13: | Singlet-A | 7.2601 eV | 170.77 nm | f=0.0232 | <S**2>=0.000 |
| 60 -> 68          | -0.10687  |           |           |          |              |
| 61 -> 68          | 0.16187   |           |           |          |              |
| 63 -> 68          | -0.19973  |           |           |          |              |
| 64 -> 67          | 0.10825   |           |           |          |              |
| 65 -> 69          | -0.15887  |           |           |          |              |
| 65 -> 71          | -0.15147  |           |           |          |              |
| 65 -> 72          | 0.10331   |           |           |          |              |
| 65 -> 74          | -0.11254  |           |           |          |              |
| 66 -> 67          | -0.11265  |           |           |          |              |
| 66 -> 73          | 0.16742   |           |           |          |              |
| 66 -> 75          | 0.31529   |           |           |          |              |
| 66 -> 80          | -0.21649  |           |           |          |              |
| Excited State 14: | Singlet-A | 7.4108 eV | 167.30 nm | f=0.0098 | <S**2>=0.000 |
| 65 -> 69          | -0.12106  |           |           |          |              |

---

---

|                   |           |           |           |          |              |
|-------------------|-----------|-----------|-----------|----------|--------------|
| 65 -> 70          | 0.47320   |           |           |          |              |
| 65 -> 73          | 0.17172   |           |           |          |              |
| 65 -> 74          | -0.11268  |           |           |          |              |
| 66 -> 70          | 0.14386   |           |           |          |              |
| 66 -> 74          | 0.15735   |           |           |          |              |
| 66 -> 76          | -0.12780  |           |           |          |              |
| 66 -> 79          | 0.14252   |           |           |          |              |
| Excited State 15: | Singlet-A | 7.5333 eV | 164.58 nm | f=0.0031 | <S**2>=0.000 |
| 64 -> 67          | 0.13254   |           |           |          |              |
| 64 -> 68          | 0.10654   |           |           |          |              |
| 65 -> 70          | -0.17618  |           |           |          |              |
| 65 -> 80          | 0.11319   |           |           |          |              |
| 66 -> 72          | -0.12135  |           |           |          |              |
| 66 -> 73          | -0.21156  |           |           |          |              |
| 66 -> 74          | 0.28301   |           |           |          |              |
| 66 -> 76          | -0.23947  |           |           |          |              |
| 66 -> 77          | -0.11457  |           |           |          |              |
| 66 -> 79          | 0.26173   |           |           |          |              |
| Excited State 16: | Singlet-A | 7.5719 eV | 163.74 nm | f=0.0068 | <S**2>=0.000 |
| 61 -> 67          | -0.11376  |           |           |          |              |
| 64 -> 67          | 0.26152   |           |           |          |              |
| 64 -> 68          | 0.14580   |           |           |          |              |
| 64 -> 69          | -0.10235  |           |           |          |              |
| 65 -> 67          | 0.15728   |           |           |          |              |
| 65 -> 69          | -0.17839  |           |           |          |              |
| 65 -> 71          | 0.28824   |           |           |          |              |
| 65 -> 75          | -0.11415  |           |           |          |              |
| 65 -> 77          | -0.26176  |           |           |          |              |
| 65 -> 83          | -0.10543  |           |           |          |              |
| 66 -> 67          | 0.11404   |           |           |          |              |
| 66 -> 72          | -0.10124  |           |           |          |              |
| 66 -> 78          | -0.10607  |           |           |          |              |
| Excited State 17: | Singlet-A | 7.5772 eV | 163.63 nm | f=0.0092 | <S**2>=0.000 |
| 63 -> 67          | -0.14870  |           |           |          |              |
| 64 -> 67          | -0.23828  |           |           |          |              |
| 64 -> 68          | -0.17961  |           |           |          |              |
| 64 -> 71          | 0.13944   |           |           |          |              |
| 64 -> 72          | -0.14016  |           |           |          |              |
| 65 -> 69          | -0.18265  |           |           |          |              |
| 65 -> 70          | -0.18351  |           |           |          |              |
| 65 -> 72          | 0.25782   |           |           |          |              |
| 65 -> 73          | -0.12145  |           |           |          |              |
| 65 -> 78          | 0.11904   |           |           |          |              |
| 65 -> 80          | -0.10321  |           |           |          |              |

---

---

|                   |           |           |           |          |              |
|-------------------|-----------|-----------|-----------|----------|--------------|
| 66 -> 74          | 0.10169   |           |           |          |              |
| 66 -> 76          | -0.12977  |           |           |          |              |
| Excited State 18: | Singlet-A | 7.6276 eV | 162.55 nm | f=0.0131 | <S**2>=0.000 |
| 61 -> 71          | 0.10592   |           |           |          |              |
| 63 -> 67          | 0.46116   |           |           |          |              |
| 63 -> 68          | 0.17404   |           |           |          |              |
| 63 -> 69          | -0.20926  |           |           |          |              |
| 64 -> 67          | 0.10499   |           |           |          |              |
| 65 -> 72          | 0.14774   |           |           |          |              |
| Excited State 19: | Singlet-A | 7.6772 eV | 161.50 nm | f=0.0009 | <S**2>=0.000 |
| 62 -> 67          | 0.31727   |           |           |          |              |
| 62 -> 69          | -0.12550  |           |           |          |              |
| 63 -> 67          | -0.11758  |           |           |          |              |
| 64 -> 67          | 0.11730   |           |           |          |              |
| 65 -> 72          | 0.14499   |           |           |          |              |
| 66 -> 67          | -0.23226  |           |           |          |              |
| 66 -> 69          | 0.16054   |           |           |          |              |
| 66 -> 72          | 0.18055   |           |           |          |              |
| 66 -> 75          | -0.12665  |           |           |          |              |
| 66 -> 78          | 0.24790   |           |           |          |              |
| Excited State 20: | Singlet-A | 7.7080 eV | 160.85 nm | f=0.0139 | <S**2>=0.000 |
| 61 -> 67          | -0.15936  |           |           |          |              |
| 61 -> 73          | -0.11696  |           |           |          |              |
| 61 -> 74          | -0.10807  |           |           |          |              |
| 62 -> 67          | 0.27369   |           |           |          |              |
| 63 -> 67          | -0.19518  |           |           |          |              |
| 64 -> 67          | 0.17362   |           |           |          |              |
| 64 -> 70          | -0.10517  |           |           |          |              |
| 64 -> 71          | 0.15711   |           |           |          |              |
| 64 -> 73          | -0.13489  |           |           |          |              |
| 64 -> 74          | -0.15896  |           |           |          |              |
| 65 -> 71          | -0.10787  |           |           |          |              |
| 65 -> 77          | 0.17448   |           |           |          |              |

---

|                         |           |           |           |          |              |
|-------------------------|-----------|-----------|-----------|----------|--------------|
| <b>4(S<sub>0</sub>)</b> |           |           |           |          |              |
| Excited State 1:        | Singlet-A | 3.2613 eV | 380.17 nm | f=0.0020 | <S**2>=0.000 |
| 57 -> 62                | -0.10971  |           |           |          |              |
| 60 -> 62                | 0.66874   |           |           |          |              |
| 60 -> 69                | -0.10595  |           |           |          |              |
| 61 -> 62                | -0.10442  |           |           |          |              |
| Excited State 2:        | Singlet-A | 3.3676 eV | 368.17 nm | f=0.2359 | <S**2>=0.000 |
| 60 -> 62                | 0.10158   |           |           |          |              |
| 61 -> 62                | 0.69571   |           |           |          |              |
| Excited State 3:        | Singlet-A | 4.8271 eV | 256.85 nm | f=0.3394 | <S**2>=0.000 |
| 56 -> 62                | 0.15489   |           |           |          |              |
| 59 -> 62                | 0.66611   |           |           |          |              |
| Excited State 4:        | Singlet-A | 5.2575 eV | 235.82 nm | f=0.0224 | <S**2>=0.000 |

|                   |           |           |           |                       |
|-------------------|-----------|-----------|-----------|-----------------------|
| 55 -> 62          | 0.24020   |           |           |                       |
| 57 -> 62          | 0.32750   |           |           |                       |
| 58 -> 62          | 0.53123   |           |           |                       |
| Excited State 5:  | Singlet-A | 5.4225 eV | 228.65 nm | f=0.0206 <S**2>=0.000 |
| 51 -> 62          | -0.12394  |           |           |                       |
| 57 -> 62          | 0.51068   |           |           |                       |
| 58 -> 62          | -0.38197  |           |           |                       |
| 60 -> 62          | 0.12934   |           |           |                       |
| 60 -> 75          | 0.11319   |           |           |                       |
| Excited State 6:  | Singlet-A | 5.8104 eV | 213.38 nm | f=0.0811 <S**2>=0.000 |
| 60 -> 69          | -0.10156  |           |           |                       |
| 61 -> 65          | 0.11988   |           |           |                       |
| 61 -> 66          | -0.16479  |           |           |                       |
| 61 -> 69          | 0.52261   |           |           |                       |
| 61 -> 70          | -0.25378  |           |           |                       |
| 61 -> 71          | -0.15760  |           |           |                       |
| 61 -> 72          | 0.15804   |           |           |                       |
| Excited State 7:  | Singlet-A | 5.9596 eV | 208.04 nm | f=0.0014 <S**2>=0.000 |
| 61 -> 63          | 0.48527   |           |           |                       |
| 61 -> 64          | -0.36774  |           |           |                       |
| 61 -> 67          | 0.12908   |           |           |                       |
| 61 -> 69          | -0.12808  |           |           |                       |
| 61 -> 76          | -0.12077  |           |           |                       |
| 61 -> 83          | -0.13561  |           |           |                       |
| Excited State 8:  | Singlet-A | 5.9707 eV | 207.65 nm | f=0.0021 <S**2>=0.000 |
| 50 -> 62          | -0.10411  |           |           |                       |
| 56 -> 62          | 0.61023   |           |           |                       |
| 59 -> 62          | -0.14914  |           |           |                       |
| 60 -> 69          | 0.12243   |           |           |                       |
| 61 -> 75          | 0.16080   |           |           |                       |
| Excited State 9:  | Singlet-A | 6.0694 eV | 204.28 nm | f=0.0059 <S**2>=0.000 |
| 50 -> 62          | -0.18077  |           |           |                       |
| 56 -> 62          | -0.15554  |           |           |                       |
| 57 -> 62          | -0.15774  |           |           |                       |
| 60 -> 62          | 0.10106   |           |           |                       |
| 60 -> 66          | -0.11297  |           |           |                       |
| 60 -> 69          | 0.44769   |           |           |                       |
| 60 -> 70          | -0.19398  |           |           |                       |
| 60 -> 71          | -0.15360  |           |           |                       |
| 60 -> 72          | 0.15213   |           |           |                       |
| 61 -> 69          | 0.12146   |           |           |                       |
| Excited State 10: | Singlet-A | 6.3117 eV | 196.44 nm | f=0.0898 <S**2>=0.000 |
| 48 -> 62          | 0.14601   |           |           |                       |
| 52 -> 62          | -0.19078  |           |           |                       |
| 55 -> 62          | 0.37015   |           |           |                       |
| 56 -> 62          | 0.11571   |           |           |                       |
| 57 -> 62          | -0.13399  |           |           |                       |
| 58 -> 62          | -0.11187  |           |           |                       |
| 60 -> 69          | -0.11986  |           |           |                       |
| 61 -> 75          | -0.34282  |           |           |                       |
| 61 -> 76          | 0.10433   |           |           |                       |



Excited State 11: Singlet-A 6.3361 eV 195.68 nm f=0.1254 <S\*\*2>=0.000  
48 -> 62 0.12844  
52 -> 62 0.19441  
55 -> 62 0.42813  
56 -> 62 -0.15968  
57 -> 62 -0.10203  
58 -> 62 -0.13537  
61 -> 65 -0.11486  
61 -> 75 0.31378

Excited State 12: Singlet-A 6.5464 eV 189.39 nm f=0.0168 <S\*\*2>=0.000  
52 -> 62 0.11912  
53 -> 62 -0.34185  
61 -> 64 0.11707  
61 -> 65 0.42694  
61 -> 66 0.15668  
61 -> 68 -0.24281

Excited State 13: Singlet-A 6.5664 eV 188.82 nm f=0.0210 <S\*\*2>=0.000  
52 -> 62 0.12283  
53 -> 62 0.54445  
54 -> 62 -0.15483  
61 -> 65 0.27291  
61 -> 66 0.10059  
61 -> 68 -0.13274

Excited State 14: Singlet-A 6.6321 eV 186.95 nm f=0.0059 <S\*\*2>=0.000  
52 -> 62 0.21588  
59 -> 63 -0.10968  
61 -> 63 0.18125  
61 -> 64 0.39381  
61 -> 65 -0.18252  
61 -> 67 0.35056  
61 -> 76 -0.13161

Excited State 15: Singlet-A 6.7175 eV 184.57 nm f=0.1327 <S\*\*2>=0.000  
48 -> 62 0.12530  
49 -> 62 -0.10176  
50 -> 62 0.49735  
51 -> 62 0.15506  
52 -> 62 0.24300  
60 -> 63 0.10024  
60 -> 65 0.10055  
60 -> 69 0.13337  
61 -> 75 -0.12867

Excited State 16: Singlet-A 6.7323 eV 184.16 nm f=0.0240 <S\*\*2>=0.000  
50 -> 62 -0.11276  
60 -> 63 0.38374  
60 -> 64 -0.12947  
60 -> 65 0.29853  
60 -> 66 0.13797  
60 -> 67 0.20315  
60 -> 68 -0.18130  
60 -> 74 0.15167  
60 -> 75 -0.11365

|                   |           |           |           |          |              |
|-------------------|-----------|-----------|-----------|----------|--------------|
| 60 -> 82          | 0.10826   |           |           |          |              |
| Excited State 17: | Singlet-A | 6.8377 eV | 181.32 nm | f=0.0990 | <S**2>=0.000 |
| 51 -> 62          | 0.19809   |           |           |          |              |
| 52 -> 62          | -0.13778  |           |           |          |              |
| 61 -> 65          | 0.12179   |           |           |          |              |
| 61 -> 66          | -0.32045  |           |           |          |              |
| 61 -> 71          | 0.37277   |           |           |          |              |
| 61 -> 72          | -0.10643  |           |           |          |              |
| 61 -> 75          | 0.18705   |           |           |          |              |
| 61 -> 82          | -0.14116  |           |           |          |              |
| Excited State 18: | Singlet-A | 6.8556 eV | 180.85 nm | f=0.1669 | <S**2>=0.000 |
| 51 -> 62          | 0.23961   |           |           |          |              |
| 52 -> 62          | -0.30597  |           |           |          |              |
| 53 -> 62          | 0.11174   |           |           |          |              |
| 54 -> 62          | 0.33444   |           |           |          |              |
| 61 -> 66          | 0.22523   |           |           |          |              |
| 61 -> 71          | -0.21236  |           |           |          |              |
| 61 -> 72          | 0.10585   |           |           |          |              |
| 61 -> 75          | 0.12622   |           |           |          |              |
| Excited State 19: | Singlet-A | 6.8710 eV | 180.45 nm | f=0.0631 | <S**2>=0.000 |
| 50 -> 62          | -0.10572  |           |           |          |              |
| 51 -> 62          | -0.16944  |           |           |          |              |
| 52 -> 62          | 0.20051   |           |           |          |              |
| 53 -> 62          | 0.15656   |           |           |          |              |
| 54 -> 62          | 0.56134   |           |           |          |              |
| 61 -> 75          | -0.10428  |           |           |          |              |
| Excited State 20: | Singlet-A | 6.9067 eV | 179.51 nm | f=0.0692 | <S**2>=0.000 |
| 48 -> 62          | 0.11683   |           |           |          |              |
| 50 -> 62          | -0.29686  |           |           |          |              |
| 51 -> 62          | 0.33407   |           |           |          |              |
| 52 -> 62          | 0.25193   |           |           |          |              |
| 57 -> 62          | 0.14211   |           |           |          |              |
| 60 -> 75          | -0.26983  |           |           |          |              |
| 60 -> 76          | 0.10816   |           |           |          |              |
| 61 -> 75          | -0.11101  |           |           |          |              |

---

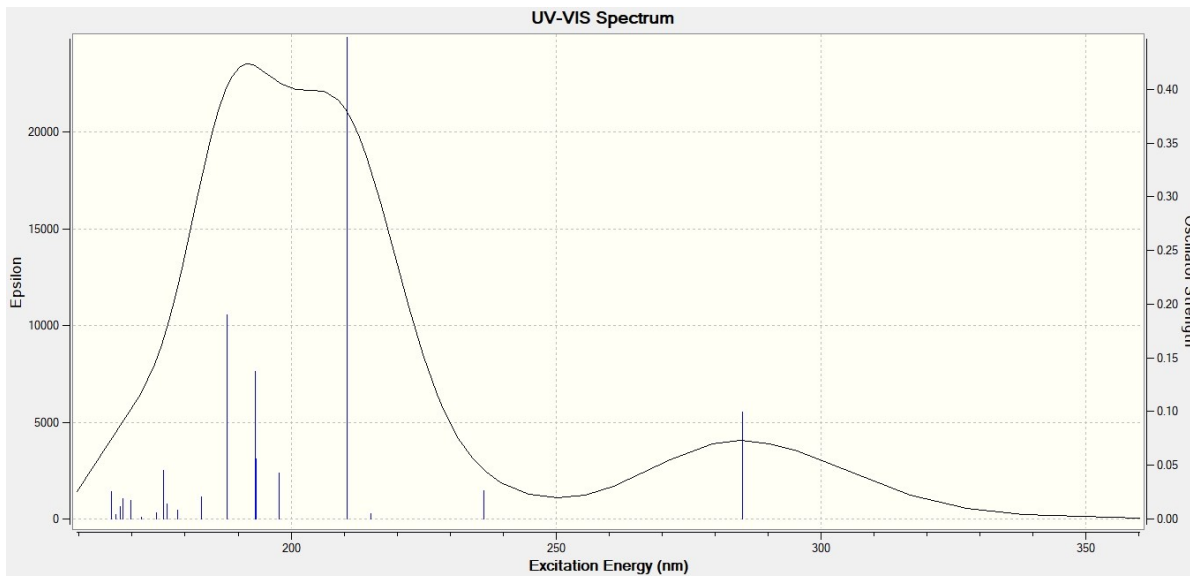

a)  
b)

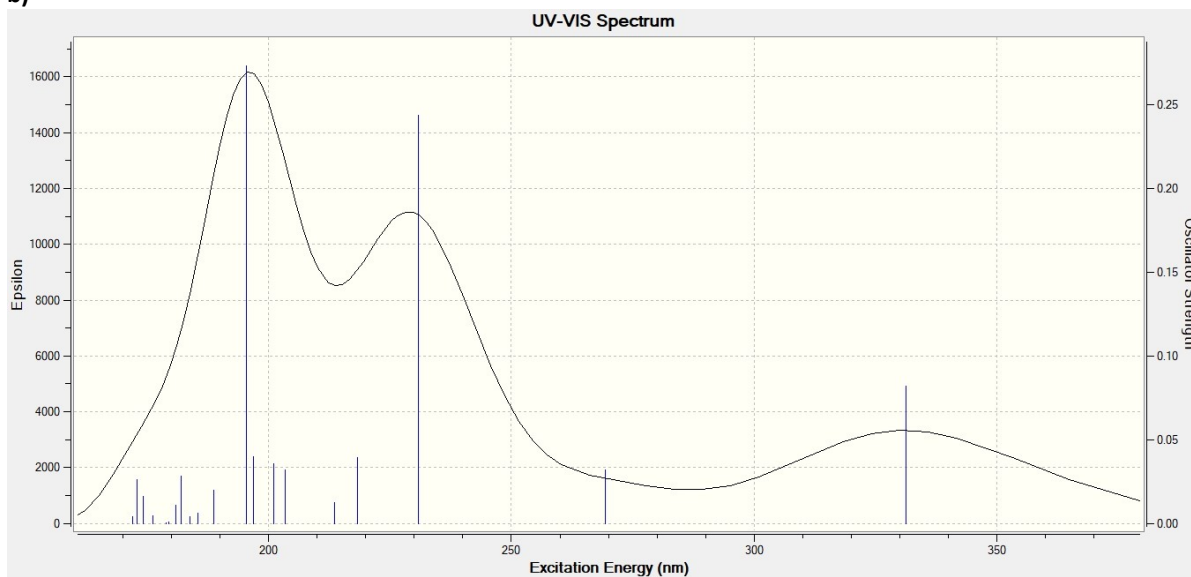

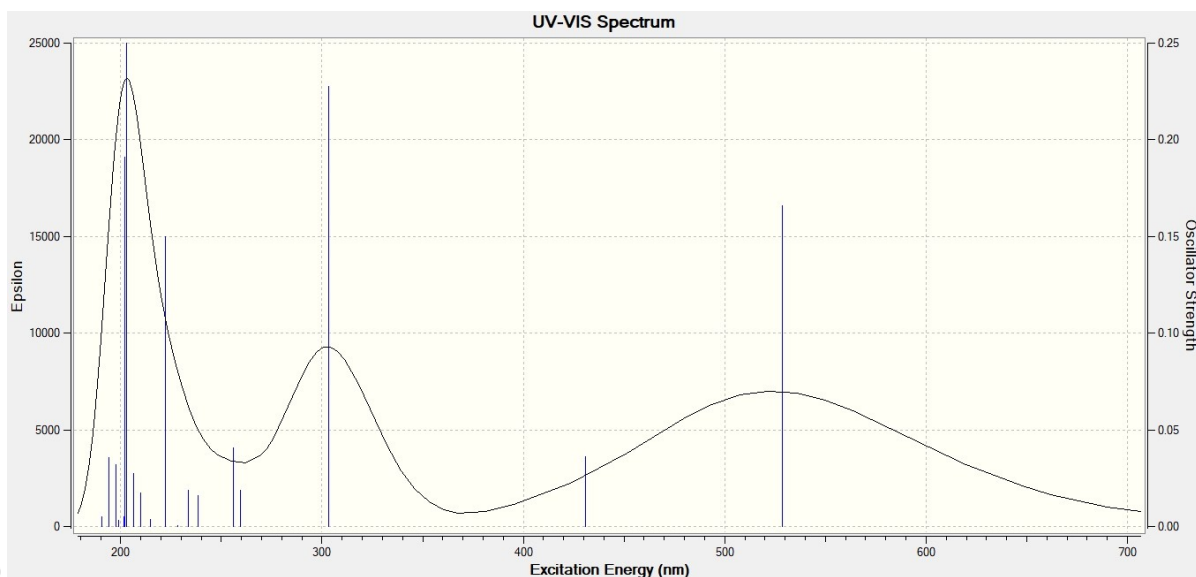

c)

**Figure S26.** Simulated spectra of  $3(S_1)$  (a),  $3'(S_1)$  (b) and  $4(S_1)$  (c) computed at the PCM(water)/TD- $\omega$ B97XD/6-311++G(d,p) level of theory.

**Table S2.** Vertical excitation of singlet  $3(S_1)$ ,  $3'(S_1)$  and  $4(S_1)$  computed at the PCM(water)/TD- $\omega$ B97XD/6-311++G(d,p) level of theory.

| $3(S_1)$      |       |           |           |           |                       |
|---------------|-------|-----------|-----------|-----------|-----------------------|
| Excited State | 1:    | Singlet-A | 4.3469 eV | 285.23 nm | f=0.0998 <S**2>=0.000 |
|               | 65 -> | 67        | -0.11363  |           |                       |
|               | 65 -> | 73        | 0.10934   |           |                       |
|               | 66 -> | 67        | 0.65474   |           |                       |
| Excited State | 2:    | Singlet-A | 5.2463 eV | 236.33 nm | f=0.0264 <S**2>=0.000 |
|               | 65 -> | 67        | 0.46561   |           |                       |
|               | 66 -> | 67        | 0.16994   |           |                       |
|               | 66 -> | 70        | -0.17408  |           |                       |
|               | 66 -> | 72        | -0.20237  |           |                       |
|               | 66 -> | 73        | -0.31205  |           |                       |
|               | 66 -> | 74        | -0.15276  |           |                       |
|               | 66 -> | 75        | 0.15631   |           |                       |
| Excited State | 3:    | Singlet-A | 5.7634 eV | 215.12 nm | f=0.0048 <S**2>=0.000 |
|               | 66 -> | 68        | 0.47585   |           |                       |
|               | 66 -> | 69        | -0.37595  |           |                       |
|               | 66 -> | 71        | -0.14595  |           |                       |
|               | 66 -> | 80        | -0.15398  |           |                       |
|               | 66 -> | 87        | -0.12117  |           |                       |
| Excited State | 4:    | Singlet-A | 5.8863 eV | 210.63 nm | f=0.4484 <S**2>=0.000 |
|               | 65 -> | 67        | 0.46580   |           |                       |
|               | 66 -> | 70        | 0.16736   |           |                       |
|               | 66 -> | 72        | 0.18975   |           |                       |
|               | 66 -> | 73        | 0.34171   |           |                       |
|               | 66 -> | 74        | 0.13735   |           |                       |
|               | 66 -> | 75        | -0.14492  |           |                       |

|                  |           |           |           |                       |
|------------------|-----------|-----------|-----------|-----------------------|
| 66 -> 77         | -0.12596  |           |           |                       |
| Excited State 5: | Singlet-A | 6.2675 eV | 197.82 nm | f=0.0426 <S**2>=0.000 |
| 65 -> 70         | 0.12932   |           |           |                       |
| 65 -> 72         | 0.12555   |           |           |                       |
| 65 -> 73         | 0.19766   |           |           |                       |
| 66 -> 67         | -0.12152  |           |           |                       |
| 66 -> 69         | -0.20436  |           |           |                       |
| 66 -> 71         | 0.41057   |           |           |                       |
| 66 -> 72         | 0.18798   |           |           |                       |
| 66 -> 73         | -0.17547  |           |           |                       |
| 66 -> 74         | 0.15208   |           |           |                       |
| Excited State 6: | Singlet-A | 6.4080 eV | 193.48 nm | f=0.0561 <S**2>=0.000 |
| 61 -> 67         | 0.14385   |           |           |                       |
| 64 -> 67         | -0.20472  |           |           |                       |
| 65 -> 68         | -0.14395  |           |           |                       |
| 65 -> 69         | 0.11143   |           |           |                       |
| 65 -> 70         | 0.11491   |           |           |                       |
| 65 -> 72         | 0.12360   |           |           |                       |
| 65 -> 73         | 0.15590   |           |           |                       |
| 65 -> 74         | 0.11443   |           |           |                       |
| 66 -> 68         | -0.12157  |           |           |                       |
| 66 -> 70         | 0.32943   |           |           |                       |
| 66 -> 71         | -0.24352  |           |           |                       |
| 66 -> 74         | -0.26581  |           |           |                       |
| 66 -> 77         | 0.11834   |           |           |                       |
| Excited State 7: | Singlet-A | 6.4175 eV | 193.20 nm | f=0.1377 <S**2>=0.000 |
| 64 -> 67         | 0.14356   |           |           |                       |
| 65 -> 70         | -0.14660  |           |           |                       |
| 65 -> 72         | -0.15875  |           |           |                       |
| 65 -> 73         | -0.26765  |           |           |                       |
| 65 -> 74         | -0.10182  |           |           |                       |
| 65 -> 75         | 0.12752   |           |           |                       |
| 66 -> 69         | -0.11631  |           |           |                       |
| 66 -> 70         | 0.36989   |           |           |                       |
| 66 -> 71         | 0.10414   |           |           |                       |
| 66 -> 72         | 0.10341   |           |           |                       |
| 66 -> 77         | 0.24330   |           |           |                       |
| 66 -> 84         | 0.12723   |           |           |                       |
| Excited State 8: | Singlet-A | 6.5970 eV | 187.94 nm | f=0.1235 <S**2>=0.000 |
| 61 -> 67         | -0.12471  |           |           |                       |
| 64 -> 67         | 0.17092   |           |           |                       |
| 65 -> 70         | 0.12128   |           |           |                       |
| 65 -> 72         | 0.11821   |           |           |                       |
| 65 -> 73         | 0.17285   |           |           |                       |
| 66 -> 68         | 0.14016   |           |           |                       |
| 66 -> 69         | 0.30049   |           |           |                       |
| 66 -> 70         | 0.15689   |           |           |                       |
| 66 -> 72         | -0.28251  |           |           |                       |
| 66 -> 76         | 0.10776   |           |           |                       |
| 66 -> 77         | 0.21842   |           |           |                       |
| 66 -> 80         | -0.15287  |           |           |                       |

|                   |           |           |           |          |              |
|-------------------|-----------|-----------|-----------|----------|--------------|
| 66 -> 84          | 0.10030   |           |           |          |              |
| Excited State 9:  | Singlet-A | 6.6004 eV | 187.84 nm | f=0.1897 | <S**2>=0.000 |
| 61 -> 67          | -0.30300  |           |           |          |              |
| 64 -> 67          | 0.42818   |           |           |          |              |
| 65 -> 73          | 0.11894   |           |           |          |              |
| 66 -> 68          | -0.13877  |           |           |          |              |
| 66 -> 69          | -0.13911  |           |           |          |              |
| 66 -> 71          | -0.12698  |           |           |          |              |
| 66 -> 73          | -0.11511  |           |           |          |              |
| 66 -> 74          | -0.16987  |           |           |          |              |
| Excited State 10: | Singlet-A | 6.7710 eV | 183.11 nm | f=0.0207 | <S**2>=0.000 |
| 65 -> 68          | 0.45391   |           |           |          |              |
| 65 -> 69          | -0.34749  |           |           |          |              |
| 65 -> 73          | 0.10001   |           |           |          |              |
| 65 -> 80          | -0.15466  |           |           |          |              |
| 66 -> 69          | -0.10706  |           |           |          |              |
| 66 -> 72          | 0.11878   |           |           |          |              |
| Excited State 11: | Singlet-A | 6.9437 eV | 178.56 nm | f=0.0086 | <S**2>=0.000 |
| 66 -> 68          | -0.21695  |           |           |          |              |
| 66 -> 73          | -0.13632  |           |           |          |              |
| 66 -> 75          | -0.17644  |           |           |          |              |
| 66 -> 76          | 0.34725   |           |           |          |              |
| 66 -> 77          | -0.12958  |           |           |          |              |
| 66 -> 80          | -0.30965  |           |           |          |              |
| 66 -> 81          | -0.11594  |           |           |          |              |
| 66 -> 84          | -0.12717  |           |           |          |              |
| 66 -> 85          | 0.15169   |           |           |          |              |
| 66 -> 87          | -0.16500  |           |           |          |              |
| Excited State 12: | Singlet-A | 7.0235 eV | 176.53 nm | f=0.0140 | <S**2>=0.000 |
| 63 -> 67          | -0.15709  |           |           |          |              |
| 65 -> 70          | -0.10887  |           |           |          |              |
| 66 -> 71          | 0.12159   |           |           |          |              |
| 66 -> 73          | 0.22796   |           |           |          |              |
| 66 -> 74          | -0.28478  |           |           |          |              |
| 66 -> 75          | 0.30676   |           |           |          |              |
| 66 -> 76          | 0.11368   |           |           |          |              |
| 66 -> 77          | -0.11672  |           |           |          |              |
| 66 -> 78          | -0.17331  |           |           |          |              |
| 66 -> 79          | -0.21277  |           |           |          |              |
| 66 -> 81          | 0.12179   |           |           |          |              |
| Excited State 13: | Singlet-A | 7.0472 eV | 175.93 nm | f=0.0450 | <S**2>=0.000 |
| 55 -> 67          | -0.11101  |           |           |          |              |
| 60 -> 67          | 0.26021   |           |           |          |              |
| 61 -> 67          | -0.15044  |           |           |          |              |
| 62 -> 67          | 0.25761   |           |           |          |              |
| 63 -> 67          | 0.46657   |           |           |          |              |
| 66 -> 74          | -0.10537  |           |           |          |              |
| Excited State 14: | Singlet-A | 7.1004 eV | 174.62 nm | f=0.0057 | <S**2>=0.000 |
| 65 -> 69          | 0.17631   |           |           |          |              |
| 66 -> 68          | 0.20560   |           |           |          |              |
| 66 -> 69          | 0.11870   |           |           |          |              |

|                   |           |           |           |          |              |
|-------------------|-----------|-----------|-----------|----------|--------------|
| 66 -> 71          | -0.15415  |           |           |          |              |
| 66 -> 72          | 0.17782   |           |           |          |              |
| 66 -> 73          | -0.13888  |           |           |          |              |
| 66 -> 75          | -0.13660  |           |           |          |              |
| 66 -> 76          | 0.31129   |           |           |          |              |
| 66 -> 78          | 0.22880   |           |           |          |              |
| 66 -> 79          | -0.12806  |           |           |          |              |
| 66 -> 87          | 0.14480   |           |           |          |              |
| Excited State 15: | Singlet-A | 7.2155 eV | 171.83 nm | f=0.0017 | <S**2>=0.000 |
| 66 -> 71          | -0.20008  |           |           |          |              |
| 66 -> 74          | 0.22419   |           |           |          |              |
| 66 -> 75          | 0.38263   |           |           |          |              |
| 66 -> 76          | 0.19638   |           |           |          |              |
| 66 -> 78          | 0.16542   |           |           |          |              |
| 66 -> 79          | 0.12165   |           |           |          |              |
| 66 -> 81          | 0.24879   |           |           |          |              |
| Excited State 16: | Singlet-A | 7.3037 eV | 169.75 nm | f=0.0169 | <S**2>=0.000 |
| 65 -> 69          | -0.16215  |           |           |          |              |
| 65 -> 70          | 0.30400   |           |           |          |              |
| 65 -> 71          | 0.15029   |           |           |          |              |
| 65 -> 72          | 0.17054   |           |           |          |              |
| 65 -> 73          | -0.17442  |           |           |          |              |
| 65 -> 77          | 0.17437   |           |           |          |              |
| 66 -> 68          | 0.20215   |           |           |          |              |
| 66 -> 69          | 0.13135   |           |           |          |              |
| 66 -> 72          | 0.13251   |           |           |          |              |
| 66 -> 74          | -0.13651  |           |           |          |              |
| 66 -> 79          | -0.13793  |           |           |          |              |
| Excited State 17: | Singlet-A | 7.3705 eV | 168.22 nm | f=0.0193 | <S**2>=0.000 |
| 62 -> 67          | 0.11427   |           |           |          |              |
| 65 -> 70          | -0.22265  |           |           |          |              |
| 65 -> 71          | 0.42409   |           |           |          |              |
| 65 -> 74          | 0.27313   |           |           |          |              |
| 66 -> 74          | 0.11382   |           |           |          |              |
| Excited State 18: | Singlet-A | 7.3923 eV | 167.72 nm | f=0.0112 | <S**2>=0.000 |
| 64 -> 68          | -0.12555  |           |           |          |              |
| 65 -> 68          | -0.13176  |           |           |          |              |
| 65 -> 69          | -0.15819  |           |           |          |              |
| 65 -> 71          | -0.10978  |           |           |          |              |
| 66 -> 68          | -0.13009  |           |           |          |              |
| 66 -> 69          | -0.20535  |           |           |          |              |
| 66 -> 70          | -0.20280  |           |           |          |              |
| 66 -> 73          | 0.17696   |           |           |          |              |
| 66 -> 75          | -0.14423  |           |           |          |              |
| 66 -> 77          | 0.17420   |           |           |          |              |
| 66 -> 84          | 0.26785   |           |           |          |              |
| 66 -> 87          | 0.16371   |           |           |          |              |
| 66 -> 89          | 0.13925   |           |           |          |              |
| Excited State 19: | Singlet-A | 7.4310 eV | 166.85 nm | f=0.0042 | <S**2>=0.000 |
| 62 -> 67          | 0.55922   |           |           |          |              |
| 63 -> 67          | -0.30032  |           |           |          |              |

Excited State 20: Singlet-A 7.4654 eV 166.08 nm f=0.0253 <S\*\*2>=0.000  
 57 -> 67 -0.15761  
 60 -> 67 -0.17293  
 61 -> 67 0.25564  
 61 -> 73 -0.12236  
 63 -> 67 0.20288  
 63 -> 68 0.10298  
 64 -> 67 0.16226  
 64 -> 70 0.12340  
 64 -> 72 0.13218  
 64 -> 73 0.12650  
 65 -> 69 0.17793  
 65 -> 71 -0.12829  
 65 -> 72 -0.15242  
 65 -> 73 0.10293

---

**3'(S<sub>1</sub>)**

Excited State 1: Singlet-A 3.7412 eV 331.40 nm f=0.0819 <S\*\*2>=0.000  
 65 -> 67 0.11014  
 66 -> 67 0.68106

Excited State 2: Singlet-A 4.6040 eV 269.30 nm f=0.0321 <S\*\*2>=0.000  
 65 -> 67 0.56725  
 66 -> 67 -0.13870  
 66 -> 70 0.15196  
 66 -> 72 -0.28243  
 66 -> 73 0.12449

Excited State 3: Singlet-A 5.3692 eV 230.92 nm f=0.2437 <S\*\*2>=0.000  
 65 -> 67 0.37328  
 66 -> 70 -0.25080  
 66 -> 71 0.14030  
 66 -> 72 0.43911  
 66 -> 73 -0.16359

Excited State 4: Singlet-A 5.6775 eV 218.38 nm f=0.0393 <S\*\*2>=0.000  
 66 -> 68 0.48051  
 66 -> 69 0.21811  
 66 -> 71 0.27541  
 66 -> 72 -0.12093  
 66 -> 73 0.11966  
 66 -> 77 0.17748  
 66 -> 80 0.10231  
 66 -> 88 0.10301

Excited State 5: Singlet-A 5.8059 eV 213.55 nm f=0.0125 <S\*\*2>=0.000  
 61 -> 67 0.21109  
 64 -> 67 0.63802

Excited State 6: Singlet-A 6.0982 eV 203.31 nm f=0.0321 <S\*\*2>=0.000  
 60 -> 67 -0.13307  
 63 -> 67 0.18506

---



---

|                   |           |           |           |          |              |
|-------------------|-----------|-----------|-----------|----------|--------------|
| 65 -> 70          | -0.12143  |           |           |          |              |
| 65 -> 72          | 0.20124   |           |           |          |              |
| 65 -> 73          | -0.10246  |           |           |          |              |
| 66 -> 68          | 0.15706   |           |           |          |              |
| 66 -> 69          | 0.36070   |           |           |          |              |
| 66 -> 71          | -0.26549  |           |           |          |              |
| 66 -> 73          | -0.15015  |           |           |          |              |
| 66 -> 74          | -0.12278  |           |           |          |              |
| 66 -> 76          | 0.10893   |           |           |          |              |
| 66 -> 77          | -0.10484  |           |           |          |              |
| Excited State 7:  | Singlet-A | 6.1670 eV | 201.04 nm | f=0.0358 | <S**2>=0.000 |
| 60 -> 67          | -0.26696  |           |           |          |              |
| 61 -> 67          | -0.16186  |           |           |          |              |
| 62 -> 67          | -0.15570  |           |           |          |              |
| 63 -> 67          | 0.42936   |           |           |          |              |
| 65 -> 72          | 0.11257   |           |           |          |              |
| 66 -> 69          | -0.19055  |           |           |          |              |
| 66 -> 71          | 0.22150   |           |           |          |              |
| Excited State 8:  | Singlet-A | 6.2994 eV | 196.82 nm | f=0.0401 | <S**2>=0.000 |
| 65 -> 70          | 0.12385   |           |           |          |              |
| 65 -> 72          | -0.24075  |           |           |          |              |
| 65 -> 73          | 0.10344   |           |           |          |              |
| 66 -> 70          | 0.49776   |           |           |          |              |
| 66 -> 71          | 0.10848   |           |           |          |              |
| 66 -> 73          | -0.19579  |           |           |          |              |
| 66 -> 75          | -0.12318  |           |           |          |              |
| Excited State 9:  | Singlet-A | 6.3456 eV | 195.39 nm | f=0.2732 | <S**2>=0.000 |
| 63 -> 67          | -0.21264  |           |           |          |              |
| 65 -> 68          | 0.10975   |           |           |          |              |
| 65 -> 70          | -0.24777  |           |           |          |              |
| 65 -> 71          | 0.13797   |           |           |          |              |
| 65 -> 72          | 0.36066   |           |           |          |              |
| 65 -> 73          | -0.15484  |           |           |          |              |
| 66 -> 70          | 0.16028   |           |           |          |              |
| 66 -> 71          | 0.20755   |           |           |          |              |
| 66 -> 72          | 0.12480   |           |           |          |              |
| 66 -> 73          | -0.11107  |           |           |          |              |
| Excited State 10: | Singlet-A | 6.5740 eV | 188.60 nm | f=0.0201 | <S**2>=0.000 |
| 66 -> 68          | 0.30228   |           |           |          |              |
| 66 -> 69          | -0.27865  |           |           |          |              |
| 66 -> 70          | 0.10359   |           |           |          |              |
| 66 -> 71          | -0.19299  |           |           |          |              |
| 66 -> 72          | 0.12831   |           |           |          |              |
| 66 -> 73          | 0.24538   |           |           |          |              |

---

---

|                   |           |           |           |          |              |
|-------------------|-----------|-----------|-----------|----------|--------------|
| 66 -> 75          | -0.14560  |           |           |          |              |
| 66 -> 76          | -0.12446  |           |           |          |              |
| 66 -> 77          | -0.22338  |           |           |          |              |
| 66 -> 84          | -0.17538  |           |           |          |              |
| Excited State 11: | Singlet-A | 6.6881 eV | 185.38 nm | f=0.0064 | <S**2>=0.000 |
| 62 -> 67          | 0.14607   |           |           |          |              |
| 65 -> 68          | 0.40685   |           |           |          |              |
| 65 -> 69          | 0.24738   |           |           |          |              |
| 65 -> 71          | 0.13061   |           |           |          |              |
| 65 -> 72          | -0.10338  |           |           |          |              |
| 65 -> 77          | 0.10362   |           |           |          |              |
| 66 -> 70          | -0.11575  |           |           |          |              |
| 66 -> 71          | -0.10106  |           |           |          |              |
| 66 -> 73          | 0.16537   |           |           |          |              |
| 66 -> 74          | -0.14119  |           |           |          |              |
| 66 -> 75          | -0.15116  |           |           |          |              |
| Excited State 12: | Singlet-A | 6.7483 eV | 183.73 nm | f=0.0042 | <S**2>=0.000 |
| 62 -> 67          | 0.62910   |           |           |          |              |
| 63 -> 67          | 0.17944   |           |           |          |              |
| Excited State 13: | Singlet-A | 6.8130 eV | 181.98 nm | f=0.0282 | <S**2>=0.000 |
| 61 -> 67          | -0.10012  |           |           |          |              |
| 63 -> 67          | -0.12369  |           |           |          |              |
| 65 -> 68          | 0.12509   |           |           |          |              |
| 65 -> 69          | 0.12284   |           |           |          |              |
| 65 -> 70          | 0.12369   |           |           |          |              |
| 66 -> 68          | 0.12233   |           |           |          |              |
| 66 -> 69          | -0.13626  |           |           |          |              |
| 66 -> 74          | 0.34329   |           |           |          |              |
| 66 -> 75          | 0.19682   |           |           |          |              |
| 66 -> 76          | 0.25206   |           |           |          |              |
| 66 -> 77          | -0.18646  |           |           |          |              |
| 66 -> 79          | -0.17092  |           |           |          |              |
| Excited State 14: | Singlet-A | 6.8574 eV | 180.80 nm | f=0.0109 | <S**2>=0.000 |
| 55 -> 67          | -0.11540  |           |           |          |              |
| 60 -> 67          | 0.17397   |           |           |          |              |
| 61 -> 67          | 0.46889   |           |           |          |              |
| 63 -> 67          | 0.32212   |           |           |          |              |
| 64 -> 67          | -0.11274  |           |           |          |              |
| 65 -> 68          | 0.13605   |           |           |          |              |
| 65 -> 69          | 0.13693   |           |           |          |              |
| Excited State 15: | Singlet-A | 6.9119 eV | 179.38 nm | f=0.0011 | <S**2>=0.000 |
| 65 -> 68          | -0.13985  |           |           |          |              |
| 65 -> 69          | -0.19176  |           |           |          |              |
| 66 -> 73          | 0.20453   |           |           |          |              |

---

---

|                   |           |           |           |          |              |
|-------------------|-----------|-----------|-----------|----------|--------------|
| 66 -> 74          | 0.10833   |           |           |          |              |
| 66 -> 75          | -0.21682  |           |           |          |              |
| 66 -> 76          | 0.40416   |           |           |          |              |
| 66 -> 77          | 0.11735   |           |           |          |              |
| 66 -> 78          | 0.17223   |           |           |          |              |
| Excited State 16: | Singlet-A | 6.9305 eV | 178.90 nm | f=0.0004 | <S**2>=0.000 |
| 66 -> 71          | -0.16976  |           |           |          |              |
| 66 -> 72          | 0.18127   |           |           |          |              |
| 66 -> 73          | 0.10820   |           |           |          |              |
| 66 -> 74          | 0.14913   |           |           |          |              |
| 66 -> 75          | 0.27533   |           |           |          |              |
| 66 -> 76          | -0.17369  |           |           |          |              |
| 66 -> 77          | 0.11647   |           |           |          |              |
| 66 -> 80          | 0.29154   |           |           |          |              |
| 66 -> 82          | -0.13630  |           |           |          |              |
| 66 -> 84          | 0.14874   |           |           |          |              |
| 66 -> 86          | -0.22583  |           |           |          |              |
| Excited State 17: | Singlet-A | 7.0404 eV | 176.10 nm | f=0.0045 | <S**2>=0.000 |
| 54 -> 67          | -0.27715  |           |           |          |              |
| 55 -> 67          | -0.11471  |           |           |          |              |
| 57 -> 67          | 0.31587   |           |           |          |              |
| 58 -> 67          | -0.13712  |           |           |          |              |
| 60 -> 67          | 0.27667   |           |           |          |              |
| 61 -> 67          | -0.30157  |           |           |          |              |
| 63 -> 67          | 0.11875   |           |           |          |              |
| 64 -> 67          | 0.19074   |           |           |          |              |
| Excited State 18: | Singlet-A | 7.1215 eV | 174.10 nm | f=0.0161 | <S**2>=0.000 |
| 65 -> 71          | 0.21683   |           |           |          |              |
| 65 -> 77          | 0.10122   |           |           |          |              |
| 66 -> 70          | -0.13827  |           |           |          |              |
| 66 -> 71          | -0.21970  |           |           |          |              |
| 66 -> 73          | -0.21152  |           |           |          |              |
| 66 -> 74          | 0.26985   |           |           |          |              |
| 66 -> 75          | -0.20493  |           |           |          |              |
| 66 -> 76          | -0.17266  |           |           |          |              |
| 66 -> 81          | 0.20995   |           |           |          |              |
| 66 -> 90          | -0.13606  |           |           |          |              |
| Excited State 19: | Singlet-A | 7.1697 eV | 172.93 nm | f=0.0264 | <S**2>=0.000 |
| 64 -> 68          | 0.10086   |           |           |          |              |
| 65 -> 69          | 0.17893   |           |           |          |              |
| 65 -> 70          | 0.28654   |           |           |          |              |
| 65 -> 71          | -0.15964  |           |           |          |              |
| 65 -> 73          | -0.23539  |           |           |          |              |
| 65 -> 77          | -0.13935  |           |           |          |              |

---

---

|                   |           |           |           |          |              |
|-------------------|-----------|-----------|-----------|----------|--------------|
| 66 -> 68          | -0.13585  |           |           |          |              |
| 66 -> 69          | 0.13084   |           |           |          |              |
| 66 -> 72          | 0.12834   |           |           |          |              |
| 66 -> 75          | -0.20559  |           |           |          |              |
| 66 -> 81          | 0.10804   |           |           |          |              |
| Excited State 20: | Singlet-A | 7.2095 eV | 171.97 nm | f=0.0042 | <S**2>=0.000 |
| 64 -> 68          | -0.13806  |           |           |          |              |
| 65 -> 69          | -0.13252  |           |           |          |              |
| 65 -> 71          | 0.14455   |           |           |          |              |
| 66 -> 68          | -0.18201  |           |           |          |              |
| 66 -> 69          | 0.28508   |           |           |          |              |
| 66 -> 73          | 0.19676   |           |           |          |              |
| 66 -> 74          | 0.13469   |           |           |          |              |
| 66 -> 76          | -0.14642  |           |           |          |              |
| 66 -> 77          | -0.12400  |           |           |          |              |
| 66 -> 83          | 0.15222   |           |           |          |              |
| 66 -> 84          | -0.24489  |           |           |          |              |
| 66 -> 86          | 0.11057   |           |           |          |              |
| 66 -> 88          | -0.12447  |           |           |          |              |

---

4(S<sub>1</sub>)

|                  |           |           |           |          |              |
|------------------|-----------|-----------|-----------|----------|--------------|
| Excited State 1: | Singlet-A | 2.3459 eV | 528.52 nm | f=0.1661 | <S**2>=0.000 |
| 60 -> 62         | -0.18621  |           |           |          |              |
| 61 -> 62         | 0.68148   |           |           |          |              |
| Excited State 2: | Singlet-A | 2.8766 eV | 431.00 nm | f=0.0361 | <S**2>=0.000 |
| 60 -> 62         | 0.66908   |           |           |          |              |
| 61 -> 62         | 0.19065   |           |           |          |              |
| Excited State 3: | Singlet-A | 4.0877 eV | 303.31 nm | f=0.2274 | <S**2>=0.000 |
| 59 -> 62         | 0.68505   |           |           |          |              |
| Excited State 4: | Singlet-A | 4.7746 eV | 259.67 nm | f=0.0189 | <S**2>=0.000 |
| 51 -> 62         | 0.14423   |           |           |          |              |
| 58 -> 62         | 0.67036   |           |           |          |              |
| Excited State 5: | Singlet-A | 4.8437 eV | 255.97 nm | f=0.0408 | <S**2>=0.000 |
| 52 -> 62         | 0.13798   |           |           |          |              |
| 56 -> 62         | -0.41228  |           |           |          |              |
| 57 -> 62         | 0.49752   |           |           |          |              |
| Excited State 6: | Singlet-A | 5.1966 eV | 238.59 nm | f=0.0160 | <S**2>=0.000 |
| 57 -> 62         | -0.14340  |           |           |          |              |
| 61 -> 66         | 0.27143   |           |           |          |              |
| 61 -> 69         | 0.57178   |           |           |          |              |
| 61 -> 72         | -0.15498  |           |           |          |              |
| Excited State 7: | Singlet-A | 5.3029 eV | 233.80 nm | f=0.0189 | <S**2>=0.000 |
| 56 -> 62         | 0.52475   |           |           |          |              |
| 57 -> 62         | 0.39313   |           |           |          |              |
| 61 -> 69         | 0.14111   |           |           |          |              |
| Excited State 8: | Singlet-A | 5.4339 eV | 228.17 nm | f=0.0003 | <S**2>=0.000 |
| 61 -> 63         | 0.47905   |           |           |          |              |
| 61 -> 64         | 0.36519   |           |           |          |              |
| 61 -> 65         | 0.14576   |           |           |          |              |

|                   |           |           |           |          |              |
|-------------------|-----------|-----------|-----------|----------|--------------|
| 61 -> 67          | 0.14216   |           |           |          |              |
| 61 -> 76          | 0.13001   |           |           |          |              |
| 61 -> 83          | 0.17026   |           |           |          |              |
| Excited State 9:  | Singlet-A | 5.5804 eV | 222.18 nm | f=0.1500 | <S**2>=0.000 |
| 55 -> 62          | -0.31583  |           |           |          |              |
| 56 -> 62          | -0.12602  |           |           |          |              |
| 61 -> 70          | -0.14320  |           |           |          |              |
| 61 -> 72          | 0.22840   |           |           |          |              |
| 61 -> 73          | 0.47730   |           |           |          |              |
| Excited State 10: | Singlet-A | 5.7708 eV | 214.85 nm | f=0.0035 | <S**2>=0.000 |
| 50 -> 62          | -0.15939  |           |           |          |              |
| 51 -> 62          | 0.23323   |           |           |          |              |
| 52 -> 62          | 0.17753   |           |           |          |              |
| 53 -> 62          | -0.12804  |           |           |          |              |
| 54 -> 62          | -0.14978  |           |           |          |              |
| 57 -> 62          | -0.11632  |           |           |          |              |
| 60 -> 66          | 0.14800   |           |           |          |              |
| 60 -> 69          | 0.39545   |           |           |          |              |
| 60 -> 70          | -0.11521  |           |           |          |              |
| 60 -> 73          | 0.26464   |           |           |          |              |
| Excited State 11: | Singlet-A | 5.9045 eV | 209.98 nm | f=0.0173 | <S**2>=0.000 |
| 53 -> 62          | 0.35652   |           |           |          |              |
| 54 -> 62          | 0.50182   |           |           |          |              |
| 55 -> 62          | -0.18985  |           |           |          |              |
| 60 -> 69          | 0.16870   |           |           |          |              |
| 60 -> 73          | 0.10076   |           |           |          |              |
| Excited State 12: | Singlet-A | 6.0113 eV | 206.25 nm | f=0.0061 | <S**2>=0.000 |
| 52 -> 62          | -0.20073  |           |           |          |              |
| 61 -> 64          | -0.24083  |           |           |          |              |
| 61 -> 65          | 0.44618   |           |           |          |              |
| 61 -> 66          | 0.18417   |           |           |          |              |
| 61 -> 67          | 0.13141   |           |           |          |              |
| 61 -> 68          | -0.27645  |           |           |          |              |
| Excited State 13: | Singlet-A | 6.0123 eV | 206.22 nm | f=0.0276 | <S**2>=0.000 |
| 50 -> 62          | -0.10822  |           |           |          |              |
| 52 -> 62          | 0.55875   |           |           |          |              |
| 57 -> 62          | -0.10837  |           |           |          |              |
| 60 -> 69          | -0.20184  |           |           |          |              |
| 61 -> 65          | 0.16749   |           |           |          |              |
| 61 -> 68          | -0.10806  |           |           |          |              |
| Excited State 14: | Singlet-A | 6.1127 eV | 202.83 nm | f=0.2500 | <S**2>=0.000 |
| 54 -> 62          | 0.16439   |           |           |          |              |
| 55 -> 62          | 0.44749   |           |           |          |              |
| 61 -> 63          | 0.11166   |           |           |          |              |
| 61 -> 64          | -0.21586  |           |           |          |              |
| 61 -> 65          | -0.13353  |           |           |          |              |
| 61 -> 67          | 0.23774   |           |           |          |              |
| 61 -> 68          | 0.11114   |           |           |          |              |
| 61 -> 72          | 0.18228   |           |           |          |              |
| 61 -> 73          | 0.13056   |           |           |          |              |
| Excited State 15: | Singlet-A | 6.1382 eV | 201.99 nm | f=0.1912 | <S**2>=0.000 |

|                   |           |           |           |          |              |
|-------------------|-----------|-----------|-----------|----------|--------------|
| 51 -> 62          | -0.22118  |           |           |          |              |
| 52 -> 62          | 0.10061   |           |           |          |              |
| 55 -> 62          | 0.28296   |           |           |          |              |
| 61 -> 63          | -0.14966  |           |           |          |              |
| 61 -> 64          | 0.27928   |           |           |          |              |
| 61 -> 65          | 0.16527   |           |           |          |              |
| 61 -> 67          | -0.26724  |           |           |          |              |
| 61 -> 70          | -0.12944  |           |           |          |              |
| 61 -> 73          | 0.17849   |           |           |          |              |
| 61 -> 76          | -0.10539  |           |           |          |              |
| Excited State 16: | Singlet-A | 6.1486 eV | 201.65 nm | f=0.0051 | <S**2>=0.000 |
| 48 -> 62          | -0.11183  |           |           |          |              |
| 51 -> 62          | 0.52817   |           |           |          |              |
| 54 -> 62          | 0.10506   |           |           |          |              |
| 58 -> 62          | -0.11743  |           |           |          |              |
| 60 -> 69          | -0.18880  |           |           |          |              |
| 61 -> 64          | 0.14988   |           |           |          |              |
| 61 -> 67          | -0.15403  |           |           |          |              |
| Excited State 17: | Singlet-A | 6.2347 eV | 198.86 nm | f=0.0033 | <S**2>=0.000 |
| 53 -> 62          | 0.57193   |           |           |          |              |
| 54 -> 62          | -0.38602  |           |           |          |              |
| Excited State 18: | Singlet-A | 6.2767 eV | 197.53 nm | f=0.0319 | <S**2>=0.000 |
| 61 -> 65          | -0.10372  |           |           |          |              |
| 61 -> 66          | 0.41365   |           |           |          |              |
| 61 -> 69          | -0.10218  |           |           |          |              |
| 61 -> 71          | 0.17161   |           |           |          |              |
| 61 -> 72          | 0.36576   |           |           |          |              |
| 61 -> 73          | -0.20471  |           |           |          |              |
| 61 -> 80          | 0.15270   |           |           |          |              |
| 61 -> 82          | -0.10904  |           |           |          |              |
| Excited State 19: | Singlet-A | 6.3842 eV | 194.21 nm | f=0.0356 | <S**2>=0.000 |
| 60 -> 65          | 0.11075   |           |           |          |              |
| 60 -> 66          | -0.11895  |           |           |          |              |
| 60 -> 69          | -0.27219  |           |           |          |              |
| 60 -> 72          | 0.31547   |           |           |          |              |
| 60 -> 73          | 0.45674   |           |           |          |              |
| Excited State 20: | Singlet-A | 6.5064 eV | 190.56 nm | f=0.0051 | <S**2>=0.000 |
| 50 -> 62          | 0.57666   |           |           |          |              |
| 52 -> 62          | 0.10920   |           |           |          |              |
| 60 -> 63          | -0.15351  |           |           |          |              |
| 60 -> 65          | -0.14740  |           |           |          |              |

---

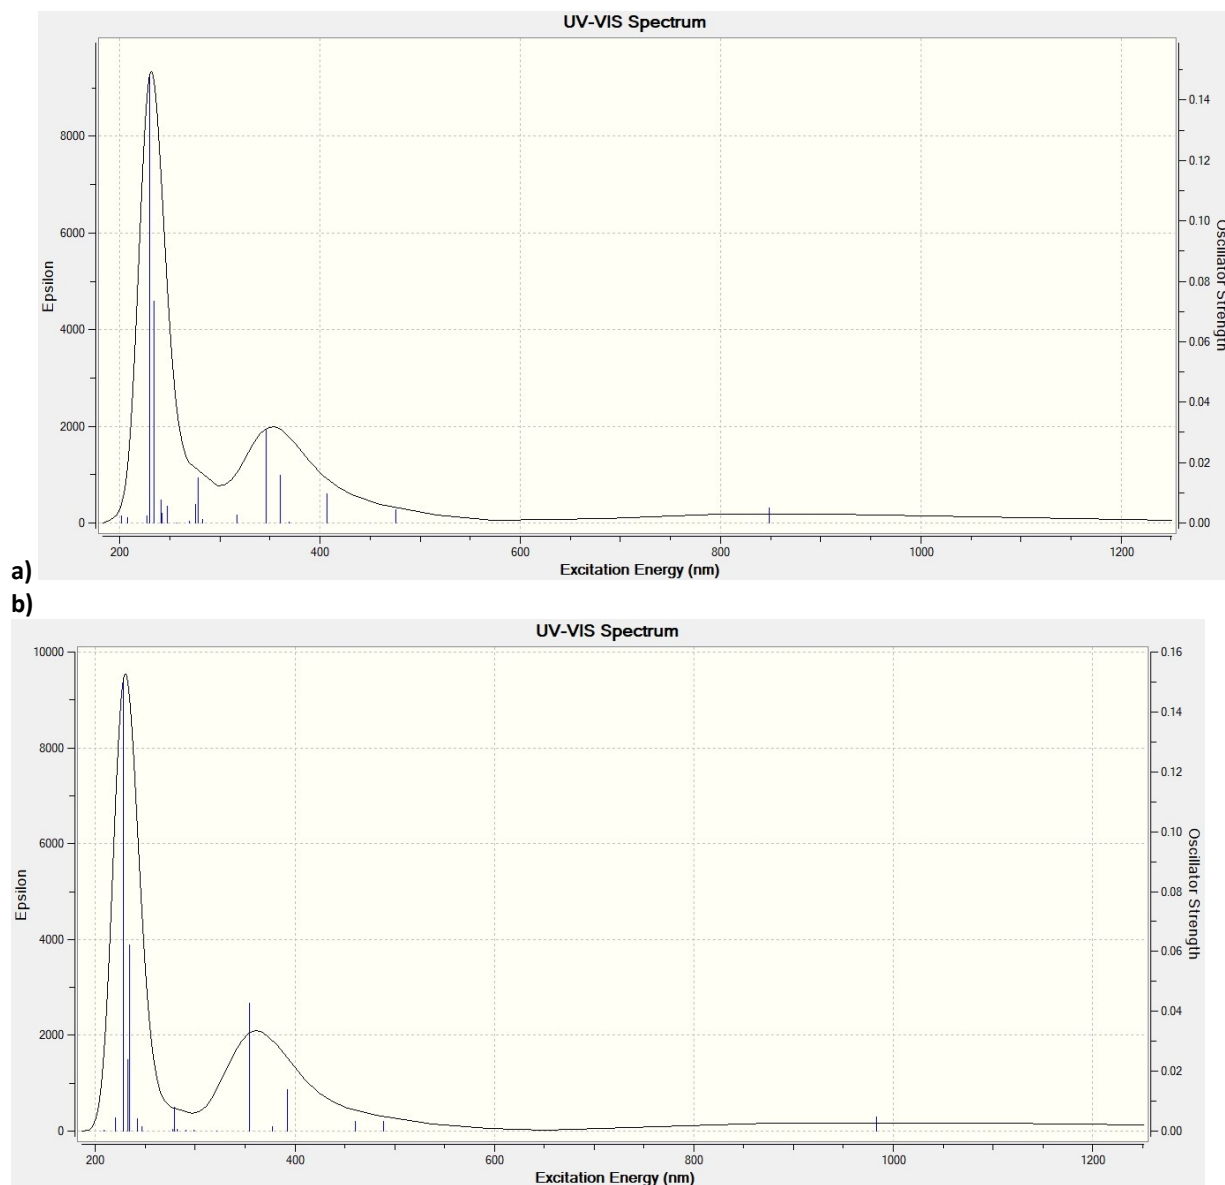

**Figure S27.** Simulated spectra of (a)  $3rc(S_0)$  and (b)  $3'rc(S_0)$  radical cation computed at the PCM(water)/TD- $\omega$ B97XD/6-311++G(d,p) level of theory.

**Table S3.** Vertical excitation of singlet  $3rc(S_0)$  and  $3'rc(S_0)$  radical cation computed at the PCM(water)/TD- $\omega$ B97XD/6-311++G(d,p) level of theory.

| $3rc(S_1)$       |                                                   |
|------------------|---------------------------------------------------|
| Excited State 1: | 2.037-A 1.4604 eV 848.97 nm f=0.0050 <S**2>=0.787 |
| 59B -> 66B       | -0.15457                                          |
| 61B -> 66B       | 0.11944                                           |
| 62B -> 66B       | 0.77524                                           |
| 63B -> 66B       | 0.20536                                           |
| 64B -> 66B       | 0.16174                                           |
| 65B -> 66B       | -0.51803                                          |

Excited State 2: 2.049-A 2.6073 eV 475.53 nm f=0.0043 <S\*\*2>=0.800  
54B -> 66B -0.16827  
56B -> 66B 0.22734  
61B -> 66B 0.66706  
62B -> 66B 0.27386  
64B -> 66B -0.20340  
65B -> 66B 0.54240

Excited State 3: 2.046-A 3.0481 eV 406.76 nm f=0.0098 <S\*\*2>=0.796  
59B -> 66B 0.35213  
62B -> 66B -0.15439  
63B -> 66B 0.65081  
64B -> 66B 0.58119  
65B -> 66B 0.12863

Excited State 4: 2.042-A 3.3568 eV 369.35 nm f=0.0004 <S\*\*2>=0.793  
55B -> 66B 0.17292  
61B -> 66B 0.17387  
63B -> 66B -0.63809  
64B -> 66B 0.69643

Excited State 5: 2.081-A 3.4391 eV 360.52 nm f=0.0159 <S\*\*2>=0.833  
62A -> 68A -0.10679  
66A -> 67A 0.13291  
50B -> 66B -0.11636  
55B -> 66B 0.39005  
56B -> 66B -0.29338  
59B -> 66B 0.12802  
61B -> 66B 0.52952  
62B -> 66B -0.32440  
64B -> 66B -0.17803  
65B -> 66B -0.46640

Excited State 6: 2.131-A 3.5818 eV 346.15 nm f=0.0308 <S\*\*2>=0.885  
62A -> 68A 0.16429  
63A -> 67A -0.12385  
66A -> 67A -0.18677  
66A -> 68A -0.10662  
53B -> 66B 0.10487  
55B -> 66B -0.37466  
56B -> 66B 0.53430  
57B -> 66B 0.16803  
59B -> 66B -0.12228  
61B -> 66B 0.24285  
62B -> 66B -0.34918  
62B -> 67B -0.11541  
64B -> 66B 0.10463  
65B -> 66B -0.38238

Excited State 7: 2.072-A 3.9117 eV 316.96 nm f=0.0025 <S\*\*2>=0.823  
48B -> 66B 0.14317  
49B -> 66B 0.13649  
50B -> 66B 0.23466  
51B -> 66B -0.14343  
53B -> 66B 0.21999  
54B -> 66B 0.62193



|                   |          |                                           |
|-------------------|----------|-------------------------------------------|
| 56B -> 66B        | 0.10362  |                                           |
| 58B -> 66B        | -0.16168 |                                           |
| 59B -> 66B        | 0.50713  |                                           |
| 61B -> 66B        | 0.17831  |                                           |
| 62B -> 66B        | 0.10544  |                                           |
| 63B -> 66B        | -0.21946 |                                           |
| 64B -> 66B        | -0.14012 |                                           |
| Excited State 8:  | 2.087-A  | 4.3912 eV 282.35 nm f=0.0012 <S**2>=0.839 |
| 50B -> 66B        | -0.18931 |                                           |
| 53B -> 66B        | -0.38536 |                                           |
| 54B -> 66B        | -0.17680 |                                           |
| 55B -> 66B        | -0.13869 |                                           |
| 56B -> 66B        | 0.12573  |                                           |
| 57B -> 66B        | -0.16561 |                                           |
| 58B -> 66B        | 0.57773  |                                           |
| 59B -> 66B        | 0.49795  |                                           |
| 61B -> 66B        | -0.10623 |                                           |
| 62B -> 66B        | 0.14692  |                                           |
| 63B -> 66B        | -0.17057 |                                           |
| Excited State 9:  | 2.779-A  | 4.4499 eV 278.62 nm f=0.0148 <S**2>=1.680 |
| 59A -> 68A        | -0.10646 |                                           |
| 61A -> 68A        | -0.10297 |                                           |
| 62A -> 68A        | 0.43649  |                                           |
| 63A -> 67A        | 0.20615  |                                           |
| 63A -> 68A        | 0.13339  |                                           |
| 65A -> 68A        | -0.14689 |                                           |
| 66A -> 67A        | 0.52827  |                                           |
| 58B -> 66B        | 0.40475  |                                           |
| 62B -> 67B        | -0.29432 |                                           |
| 62B -> 68B        | 0.10327  |                                           |
| 65B -> 67B        | 0.17668  |                                           |
| Excited State 10: | 2.204-A  | 4.4982 eV 275.63 nm f=0.0062 <S**2>=0.964 |
| 62A -> 68A        | -0.19120 |                                           |
| 66A -> 67A        | -0.23618 |                                           |
| 50B -> 66B        | 0.15732  |                                           |
| 53B -> 66B        | 0.24720  |                                           |
| 54B -> 66B        | 0.37184  |                                           |
| 56B -> 66B        | -0.14143 |                                           |
| 57B -> 66B        | 0.11316  |                                           |
| 58B -> 66B        | 0.65050  |                                           |
| 59B -> 66B        | -0.30466 |                                           |
| 62B -> 67B        | 0.12239  |                                           |
| 65B -> 66B        | 0.12153  |                                           |
| Excited State 11: | 2.040-A  | 4.6066 eV 269.14 nm f=0.0007 <S**2>=0.790 |
| 60B -> 66B        | 0.97732  |                                           |
| 61B -> 66B        | -0.11019 |                                           |
| Excited State 12: | 2.051-A  | 4.8197 eV 257.25 nm f=0.0001 <S**2>=0.801 |
| 46B -> 66B        | 0.15237  |                                           |
| 48B -> 66B        | -0.49192 |                                           |
| 49B -> 66B        | -0.21740 |                                           |
| 54B -> 66B        | -0.10092 |                                           |

|                   |          |                                           |
|-------------------|----------|-------------------------------------------|
| 57B -> 66B        | 0.69885  |                                           |
| 59B -> 66B        | 0.32923  |                                           |
| Excited State 13: | 2.099-A  | 5.0035 eV 247.79 nm f=0.0057 <S**2>=0.851 |
| 66A -> 67A        | 0.13182  |                                           |
| 45B -> 66B        | -0.12784 |                                           |
| 46B -> 66B        | 0.20940  |                                           |
| 47B -> 66B        | 0.37042  |                                           |
| 48B -> 66B        | 0.65446  |                                           |
| 52B -> 66B        | -0.11522 |                                           |
| 53B -> 66B        | 0.15524  |                                           |
| 54B -> 66B        | -0.13360 |                                           |
| 55B -> 66B        | 0.11876  |                                           |
| 56B -> 66B        | 0.14783  |                                           |
| 57B -> 66B        | 0.36188  |                                           |
| 61B -> 66B        | -0.15275 |                                           |
| Excited State 14: | 2.471-A  | 5.1126 eV 242.51 nm f=0.0032 <S**2>=1.276 |
| 59A -> 67A        | 0.11047  |                                           |
| 62A -> 67A        | -0.53612 |                                           |
| 63A -> 67A        | -0.21843 |                                           |
| 63A -> 68A        | 0.26775  |                                           |
| 65A -> 67A        | 0.23229  |                                           |
| 65A -> 68A        | -0.14195 |                                           |
| 66A -> 68A        | 0.63073  |                                           |
| 46B -> 66B        | -0.10668 |                                           |
| 57B -> 66B        | 0.11779  |                                           |
| Excited State 15: | 2.145-A  | 5.1379 eV 241.31 nm f=0.0077 <S**2>=0.900 |
| 62A -> 67A        | -0.19297 |                                           |
| 66A -> 68A        | 0.10228  |                                           |
| 42B -> 66B        | -0.17897 |                                           |
| 45B -> 66B        | -0.12779 |                                           |
| 46B -> 66B        | 0.50161  |                                           |
| 47B -> 66B        | 0.20705  |                                           |
| 48B -> 66B        | -0.16430 |                                           |
| 49B -> 66B        | -0.18811 |                                           |
| 51B -> 66B        | 0.10966  |                                           |
| 52B -> 66B        | -0.12757 |                                           |
| 53B -> 66B        | 0.42344  |                                           |
| 54B -> 66B        | -0.11721 |                                           |
| 55B -> 66B        | -0.20756 |                                           |
| 57B -> 66B        | -0.42510 |                                           |
| 59B -> 66B        | 0.12921  |                                           |
| Excited State 16: | 2.916-A  | 5.2953 eV 234.14 nm f=0.0735 <S**2>=1.876 |
| 62A -> 67A        | -0.35163 |                                           |
| 62A -> 68A        | -0.29781 |                                           |
| 63A -> 68A        | -0.24917 |                                           |
| 65A -> 68A        | 0.20239  |                                           |
| 66A -> 67A        | 0.46677  |                                           |
| 66A -> 68A        | -0.28987 |                                           |
| 55B -> 66B        | -0.19426 |                                           |
| 57B -> 66B        | 0.11132  |                                           |
| 62B -> 68B        | -0.38066 |                                           |

|                   |          |                                           |
|-------------------|----------|-------------------------------------------|
| 65B -> 68B        | 0.23116  |                                           |
| Excited State 17: | 2.557-A  | 5.4042 eV 229.42 nm f=0.1478 <S**2>=1.385 |
| 62A -> 67A        | 0.27060  |                                           |
| 63A -> 67A        | 0.25988  |                                           |
| 63A -> 68A        | 0.14453  |                                           |
| 65A -> 67A        | -0.20114 |                                           |
| 66A -> 67A        | 0.35312  |                                           |
| 66A -> 68A        | 0.40979  |                                           |
| 43B -> 66B        | 0.10326  |                                           |
| 48B -> 66B        | -0.14884 |                                           |
| 54B -> 66B        | 0.13013  |                                           |
| 55B -> 66B        | -0.32511 |                                           |
| 56B -> 66B        | 0.19865  |                                           |
| 62B -> 67B        | 0.35054  |                                           |
| 65B -> 67B        | -0.21507 |                                           |
| Excited State 18: | 2.106-A  | 5.4678 eV 226.75 nm f=0.0024 <S**2>=0.859 |
| 66A -> 67A        | 0.13507  |                                           |
| 43B -> 66B        | -0.16258 |                                           |
| 48B -> 66B        | -0.20047 |                                           |
| 50B -> 66B        | -0.13973 |                                           |
| 51B -> 66B        | 0.11153  |                                           |
| 54B -> 66B        | 0.16481  |                                           |
| 55B -> 66B        | 0.55417  |                                           |
| 56B -> 66B        | 0.61455  |                                           |
| 57B -> 66B        | -0.13966 |                                           |
| 61B -> 66B        | -0.18492 |                                           |
| 64B -> 66B        | -0.12045 |                                           |
| Excited State 19: | 2.151-A  | 5.9710 eV 207.64 nm f=0.0018 <S**2>=0.906 |
| 41B -> 66B        | 0.26294  |                                           |
| 42B -> 66B        | 0.24036  |                                           |
| 45B -> 66B        | 0.33961  |                                           |
| 46B -> 66B        | -0.28339 |                                           |
| 50B -> 66B        | 0.27153  |                                           |
| 51B -> 66B        | -0.10625 |                                           |
| 52B -> 66B        | 0.30699  |                                           |
| 53B -> 66B        | 0.43632  |                                           |
| 54B -> 66B        | -0.36982 |                                           |
| 59B -> 66B        | 0.14373  |                                           |
| 62B -> 67B        | 0.14822  |                                           |
| 65B -> 67B        | -0.11373 |                                           |
| Excited State 20: | 2.207-A  | 6.1384 eV 201.98 nm f=0.0023 <S**2>=0.967 |
| 61A -> 67A        | 0.10155  |                                           |
| 40B -> 66B        | -0.29064 |                                           |
| 43B -> 66B        | 0.47438  |                                           |
| 44B -> 66B        | -0.34797 |                                           |
| 45B -> 66B        | 0.21840  |                                           |
| 46B -> 66B        | -0.20010 |                                           |
| 50B -> 66B        | -0.30662 |                                           |
| 51B -> 66B        | 0.12750  |                                           |
| 52B -> 66B        | -0.40828 |                                           |
| 53B -> 66B        | 0.24077  |                                           |

62B -> 67B -0.11735

---

**3'rc(S<sub>1</sub>)**

Excited State 1: 2.037-A 1.2612 eV 983.04 nm f=0.0048 <S\*\*2>=0.788

61B -> 66B -0.37552

62B -> 66B -0.59218

63B -> 66B -0.27225

65B -> 66B 0.62854

Excited State 2: 2.053-A 2.5370 eV 488.70 nm f=0.0033 <S\*\*2>=0.804

53B -> 66B -0.10949

56B -> 66B 0.14036

60B -> 66B 0.17586

61B -> 66B 0.69199

63B -> 66B 0.33847

64B -> 66B 0.12450

65B -> 66B 0.51300

Excited State 3: 2.045-A 2.6908 eV 460.78 nm f=0.0034 <S\*\*2>=0.795

53B -> 66B -0.16022

54B -> 66B 0.13841

60B -> 66B 0.28493

61B -> 66B -0.20303

62B -> 66B -0.28924

63B -> 66B 0.17091

64B -> 66B 0.78941

65B -> 66B -0.23405

Excited State 4: 2.061-A 3.1589 eV 392.50 nm f=0.0139 <S\*\*2>=0.812

54B -> 66B 0.11661

55B -> 66B 0.12316

56B -> 66B -0.34150

61B -> 66B -0.27441

62B -> 66B -0.11823

63B -> 66B 0.79912

64B -> 66B -0.27371

Excited State 5: 2.042-A 3.2857 eV 377.35 nm f=0.0014 <S\*\*2>=0.793

51B -> 66B -0.10045

57B -> 66B -0.10179

60B -> 66B -0.11972

61B -> 66B -0.33874

62B -> 66B 0.67159

64B -> 66B 0.35438

65B -> 66B 0.49016

Excited State 6: 2.185-A 3.4940 eV 354.85 nm f=0.0426 <S\*\*2>=0.943

61A -> 68A 0.14687

62A -> 68A 0.18217

63A -> 67A -0.17879

---

---

|                  |          |           |           |          |              |
|------------------|----------|-----------|-----------|----------|--------------|
| 66A -> 67A       | -0.13059 |           |           |          |              |
| 66A -> 68A       | -0.11756 |           |           |          |              |
| 49B -> 66B       | 0.11168  |           |           |          |              |
| 54B -> 66B       | -0.40072 |           |           |          |              |
| 55B -> 66B       | -0.44605 |           |           |          |              |
| 56B -> 66B       | 0.47550  |           |           |          |              |
| 57B -> 66B       | 0.21343  |           |           |          |              |
| 61B -> 66B       | -0.25605 |           |           |          |              |
| 61B -> 67B       | 0.10751  |           |           |          |              |
| 63B -> 66B       | 0.31725  |           |           |          |              |
| Excited State 7: | 2.046-A  | 3.8489 eV | 322.12 nm | f=0.0001 | <S**2>=0.797 |
| 49B -> 66B       | -0.13763 |           |           |          |              |
| 50B -> 66B       | 0.20956  |           |           |          |              |
| 51B -> 66B       | 0.23093  |           |           |          |              |
| 53B -> 66B       | -0.34263 |           |           |          |              |
| 54B -> 66B       | 0.27182  |           |           |          |              |
| 55B -> 66B       | -0.18459 |           |           |          |              |
| 57B -> 66B       | -0.23932 |           |           |          |              |
| 58B -> 66B       | 0.13503  |           |           |          |              |
| 59B -> 66B       | -0.14284 |           |           |          |              |
| 60B -> 66B       | 0.57512  |           |           |          |              |
| 61B -> 66B       | -0.16551 |           |           |          |              |
| 62B -> 66B       | 0.23817  |           |           |          |              |
| 64B -> 66B       | -0.33481 |           |           |          |              |
| Excited State 8: | 2.051-A  | 4.1493 eV | 298.81 nm | f=0.0003 | <S**2>=0.802 |
| 49B -> 66B       | 0.10160  |           |           |          |              |
| 50B -> 66B       | -0.20862 |           |           |          |              |
| 51B -> 66B       | -0.22644 |           |           |          |              |
| 53B -> 66B       | 0.57192  |           |           |          |              |
| 54B -> 66B       | -0.12918 |           |           |          |              |
| 56B -> 66B       | -0.12663 |           |           |          |              |
| 57B -> 66B       | 0.15116  |           |           |          |              |
| 58B -> 66B       | 0.23685  |           |           |          |              |
| 59B -> 66B       | 0.12809  |           |           |          |              |
| 60B -> 66B       | 0.62274  |           |           |          |              |
| Excited State 9: | 2.068-A  | 4.2589 eV | 291.12 nm | f=0.0004 | <S**2>=0.819 |
| 48B -> 66B       | -0.14441 |           |           |          |              |
| 49B -> 66B       | 0.11507  |           |           |          |              |
| 51B -> 66B       | 0.20374  |           |           |          |              |
| 53B -> 66B       | -0.12608 |           |           |          |              |
| 55B -> 66B       | 0.16445  |           |           |          |              |
| 57B -> 66B       | 0.22916  |           |           |          |              |
| 58B -> 66B       | 0.85351  |           |           |          |              |
| 60B -> 66B       | -0.20701 |           |           |          |              |

---

---

|                   |          |           |           |          |              |
|-------------------|----------|-----------|-----------|----------|--------------|
| Excited State 10: | 2.048-A  | 4.4003 eV | 281.76 nm | f=0.0007 | <S**2>=0.799 |
| 47B -> 66B        | 0.14612  |           |           |          |              |
| 48B -> 66B        | -0.33461 |           |           |          |              |
| 49B -> 66B        | 0.36365  |           |           |          |              |
| 51B -> 66B        | 0.30559  |           |           |          |              |
| 54B -> 66B        | 0.10859  |           |           |          |              |
| 55B -> 66B        | 0.15705  |           |           |          |              |
| 57B -> 66B        | 0.51448  |           |           |          |              |
| 58B -> 66B        | -0.32004 |           |           |          |              |
| 59B -> 66B        | -0.40031 |           |           |          |              |
| 60B -> 66B        | 0.15133  |           |           |          |              |
| 65B -> 66B        | 0.10725  |           |           |          |              |
| Excited State 11: | 2.990-A  | 4.4385 eV | 279.34 nm | f=0.0081 | <S**2>=1.985 |
| 61A -> 68A        | 0.28855  |           |           |          |              |
| 62A -> 68A        | 0.43726  |           |           |          |              |
| 63A -> 67A        | 0.33434  |           |           |          |              |
| 63A -> 68A        | 0.20722  |           |           |          |              |
| 64A -> 67A        | -0.19752 |           |           |          |              |
| 66A -> 67A        | 0.36980  |           |           |          |              |
| 66A -> 68A        | -0.20514 |           |           |          |              |
| 58B -> 66B        | 0.12781  |           |           |          |              |
| 59B -> 66B        | -0.18199 |           |           |          |              |
| 61B -> 67B        | 0.20988  |           |           |          |              |
| 62B -> 67B        | 0.27637  |           |           |          |              |
| 63B -> 67B        | 0.12681  |           |           |          |              |
| 65B -> 67B        | -0.26481 |           |           |          |              |
| Excited State 12: | 2.088-A  | 4.4654 eV | 277.65 nm | f=0.0005 | <S**2>=0.840 |
| 47B -> 66B        | 0.12215  |           |           |          |              |
| 48B -> 66B        | -0.18226 |           |           |          |              |
| 50B -> 66B        | 0.15428  |           |           |          |              |
| 51B -> 66B        | 0.17031  |           |           |          |              |
| 57B -> 66B        | 0.17200  |           |           |          |              |
| 58B -> 66B        | -0.19185 |           |           |          |              |
| 59B -> 66B        | 0.85732  |           |           |          |              |
| Excited State 13: | 2.068-A  | 5.0359 eV | 246.20 nm | f=0.0014 | <S**2>=0.820 |
| 42B -> 66B        | -0.15138 |           |           |          |              |
| 47B -> 66B        | -0.33117 |           |           |          |              |
| 48B -> 66B        | 0.27144  |           |           |          |              |
| 49B -> 66B        | -0.37077 |           |           |          |              |
| 51B -> 66B        | -0.22820 |           |           |          |              |
| 53B -> 66B        | -0.26749 |           |           |          |              |
| 54B -> 66B        | 0.17086  |           |           |          |              |
| 57B -> 66B        | 0.65111  |           |           |          |              |
| Excited State 14: | 2.873-A  | 5.1203 eV | 242.14 nm | f=0.0042 | <S**2>=1.814 |

---

---

|                   |          |           |           |          |              |
|-------------------|----------|-----------|-----------|----------|--------------|
| 61A -> 67A        | 0.33881  |           |           |          |              |
| 62A -> 67A        | 0.58344  |           |           |          |              |
| 63A -> 67A        | 0.25217  |           |           |          |              |
| 63A -> 68A        | -0.31264 |           |           |          |              |
| 64A -> 68A        | 0.19241  |           |           |          |              |
| 66A -> 67A        | -0.33498 |           |           |          |              |
| 66A -> 68A        | -0.38109 |           |           |          |              |
| 62B -> 68B        | -0.12323 |           |           |          |              |
| 65B -> 68B        | 0.11993  |           |           |          |              |
| Excited State 15: | 2.083-A  | 5.1302 eV | 241.67 nm | f=0.0011 | <S**2>=0.835 |
| 41B -> 66B        | 0.10736  |           |           |          |              |
| 42B -> 66B        | -0.10400 |           |           |          |              |
| 43B -> 66B        | 0.22578  |           |           |          |              |
| 45B -> 66B        | 0.37641  |           |           |          |              |
| 46B -> 66B        | 0.50323  |           |           |          |              |
| 47B -> 66B        | 0.43739  |           |           |          |              |
| 50B -> 66B        | 0.22278  |           |           |          |              |
| 51B -> 66B        | -0.27983 |           |           |          |              |
| 52B -> 66B        | -0.20159 |           |           |          |              |
| 54B -> 66B        | 0.28220  |           |           |          |              |
| 55B -> 66B        | -0.11613 |           |           |          |              |
| Excited State 16: | 2.331-A  | 5.2868 eV | 234.52 nm | f=0.0623 | <S**2>=1.108 |
| 61A -> 67A        | 0.10377  |           |           |          |              |
| 62A -> 67A        | 0.17429  |           |           |          |              |
| 63A -> 68A        | 0.35061  |           |           |          |              |
| 64A -> 68A        | -0.19009 |           |           |          |              |
| 66A -> 67A        | -0.16018 |           |           |          |              |
| 66A -> 68A        | 0.34215  |           |           |          |              |
| 42B -> 66B        | -0.10244 |           |           |          |              |
| 45B -> 66B        | -0.12381 |           |           |          |              |
| 53B -> 66B        | 0.25275  |           |           |          |              |
| 54B -> 66B        | 0.37815  |           |           |          |              |
| 55B -> 66B        | 0.15153  |           |           |          |              |
| 56B -> 66B        | 0.45129  |           |           |          |              |
| 61B -> 66B        | -0.11162 |           |           |          |              |
| 61B -> 68B        | -0.14105 |           |           |          |              |
| 62B -> 68B        | -0.18825 |           |           |          |              |
| 65B -> 68B        | 0.17834  |           |           |          |              |
| Excited State 17: | 2.385-A  | 5.3379 eV | 232.27 nm | f=0.0240 | <S**2>=1.172 |
| 62A -> 67A        | -0.13218 |           |           |          |              |
| 62A -> 68A        | -0.14702 |           |           |          |              |
| 63A -> 67A        | 0.11709  |           |           |          |              |
| 63A -> 68A        | -0.36842 |           |           |          |              |
| 64A -> 67A        | -0.10574 |           |           |          |              |

---

---

|                   |          |                                           |
|-------------------|----------|-------------------------------------------|
| 64A -> 68A        | 0.18340  |                                           |
| 66A -> 67A        | 0.31320  |                                           |
| 66A -> 68A        | -0.28368 |                                           |
| 53B -> 66B        | 0.18014  |                                           |
| 54B -> 66B        | 0.28481  |                                           |
| 55B -> 66B        | 0.12030  |                                           |
| 56B -> 66B        | 0.50002  |                                           |
| 61B -> 68B        | 0.13707  |                                           |
| 62B -> 68B        | 0.19720  |                                           |
| 65B -> 68B        | -0.19895 |                                           |
| Excited State 18: | 2.409-A  | 5.4462 eV 227.65 nm f=0.1498 <S**2>=1.201 |
| 62A -> 67A        | 0.18839  |                                           |
| 63A -> 67A        | 0.47459  |                                           |
| 63A -> 68A        | 0.10622  |                                           |
| 64A -> 67A        | -0.23160 |                                           |
| 66A -> 67A        | 0.38035  |                                           |
| 66A -> 68A        | 0.22436  |                                           |
| 42B -> 66B        | 0.14048  |                                           |
| 45B -> 66B        | 0.15333  |                                           |
| 54B -> 66B        | -0.32742 |                                           |
| 55B -> 66B        | -0.14789 |                                           |
| 56B -> 66B        | 0.18286  |                                           |
| 61B -> 67B        | -0.16202 |                                           |
| 62B -> 67B        | -0.23994 |                                           |
| 63B -> 67B        | -0.12210 |                                           |
| 65B -> 67B        | 0.25340  |                                           |
| Excited State 19: | 2.069-A  | 5.6420 eV 219.75 nm f=0.0043 <S**2>=0.820 |
| 45B -> 66B        | 0.25819  |                                           |
| 49B -> 66B        | -0.12940 |                                           |
| 51B -> 66B        | -0.12361 |                                           |
| 53B -> 66B        | -0.25253 |                                           |
| 54B -> 66B        | -0.34425 |                                           |
| 55B -> 66B        | 0.72058  |                                           |
| 56B -> 66B        | 0.26557  |                                           |
| 60B -> 66B        | 0.17286  |                                           |
| Excited State 20: | 2.126-A  | 5.9459 eV 208.52 nm f=0.0003 <S**2>=0.880 |
| 40B -> 66B        | 0.19836  |                                           |
| 41B -> 66B        | -0.30164 |                                           |
| 42B -> 66B        | 0.19691  |                                           |
| 43B -> 66B        | 0.48693  |                                           |
| 44B -> 66B        | 0.19552  |                                           |
| 49B -> 66B        | -0.42957 |                                           |
| 50B -> 66B        | 0.23779  |                                           |
| 51B -> 66B        | 0.31633  |                                           |

---



|            |          |
|------------|----------|
| 52B -> 66B | 0.12039  |
| 53B -> 66B | 0.31043  |
| 53B -> 67B | -0.12340 |
| 54B -> 66B | -0.10424 |

**Table S4.** Electronic energies, zero-point vibrational energies, enthalpies and Gibbs energies of **3**, **3'**, **TS**, and **4** in hartree computed at the PCM(water)/(TD-) $\omega$ B97XD/6-311++G(d,p) level of theory.

| compound                      | <i>E</i>    | <i>ZPVE</i> | <i>H</i>    | <i>G</i>    |
|-------------------------------|-------------|-------------|-------------|-------------|
| <b>3(S<sub>0</sub>)</b>       | -772.200043 | 0.336145    | -771.849724 | -771.902342 |
| <b>3(S<sub>1</sub>)</b>       | -772.024240 | 0.330859    | -771.678357 | -771.732814 |
| <b>3'(S<sub>0</sub>)</b>      | -772.188675 | 0.335160    | -771.838757 | -771.892762 |
| <b>3'(S<sub>1</sub>)</b>      | -772.013289 | 0.329769    | -771.668068 | -771.723800 |
| <b>TS(S<sub>0</sub>)</b>      | -772.151188 | 0.332666    | -771.804330 | -771.857011 |
| <b>TS(S<sub>1</sub>) s.p.</b> | -772.034317 | n.a.        | n.a.        | n.a.        |
| <b>4(S<sub>0</sub>)</b>       | -695.722207 | 0.306650    | -695.402073 | -695.454941 |
| <b>4(S<sub>1</sub>)</b>       | -695.620555 | 0.303339    | -695.303578 | -695.356520 |

**Table S5.** Conical intersection optimization scan for **4(S<sub>0</sub>)** formation in hartree computed at the (TD-) $\omega$ B97X/6-311++G(d,p) level of theory using ORCA 4.2.0.

| Item          | Geometry convergence |              |                               |
|---------------|----------------------|--------------|-------------------------------|
|               | Value                | Tolerance    | Converged                     |
| Energy change | 0.0125993207         | 0.0000050000 | NO                            |
| E diff. (CI)  | 0.0053210067         | 0.0001000000 | NO 3.3 kcal mol <sup>-1</sup> |
| RMS gradient  | 0.0069959798         | 0.0001000000 | NO                            |
| MAX gradient  | 0.0535645244         | 0.0003000000 | NO                            |
| RMS step      | 0.0188608384         | 0.0020000000 | NO                            |
| MAX step      | 0.2071330471         | 0.0040000000 | NO                            |
| Max(Bonds)    | 0.0478               | Max(Angles)  | 3.30                          |
| Max(Dihed)    | 11.87                | Max(Improp)  | 0.00                          |

---

| Coordinates (S <sub>0</sub> ) |              |              |              |
|-------------------------------|--------------|--------------|--------------|
| 6                             | -2.619962000 | 0.936194000  | -1.541115000 |
| 6                             | -3.353689000 | 0.334400000  | -0.337393000 |
| 6                             | -2.334823000 | -0.236073000 | 0.655523000  |
| 6                             | -1.516082000 | -1.334427000 | -0.035649000 |
| 6                             | -0.751072000 | -0.720567000 | -1.229701000 |
| 6                             | -1.773569000 | -0.143109000 | -2.223765000 |
| 6                             | -1.693317000 | 2.055895000  | -1.060384000 |
| 6                             | -1.397629000 | 0.885734000  | 1.125734000  |
| 6                             | 0.163352000  | 0.373857000  | -0.713762000 |
| 6                             | -0.642371000 | 1.494680000  | -0.082754000 |
| 8                             | 1.912303000  | 3.418723000  | -3.133119000 |
| 6                             | 1.536491000  | 0.057559000  | -0.380632000 |
| 6                             | 1.913592000  | -1.306688000 | -0.226545000 |
| 6                             | 3.115048000  | -1.698651000 | 0.338602000  |
| 6                             | 4.036883000  | -0.742457000 | 0.761624000  |
| 6                             | 3.756777000  | 0.599562000  | 0.535724000  |
| 6                             | 2.578311000  | 0.996823000  | -0.076826000 |
| 8                             | 2.483042000  | 2.346581000  | -0.349619000 |
| 1                             | -3.350930000 | 1.336829000  | -2.255212000 |
| 1                             | -3.965027000 | 1.102304000  | 0.153733000  |
| 1                             | -4.037066000 | -0.455346000 | -0.672651000 |
| 1                             | -2.860140000 | -0.659268000 | 1.519704000  |
| 1                             | -2.176972000 | -2.137610000 | -0.390416000 |
| 1                             | -0.808706000 | -1.780962000 | 0.673152000  |
| 1                             | -0.178473000 | -1.497579000 | -1.741647000 |
| 1                             | -1.252007000 | 0.273367000  | -3.092330000 |
| 1                             | -2.418925000 | -0.951197000 | -2.591704000 |
| 1                             | -1.208020000 | 2.517524000  | -1.913648000 |
| 1                             | -2.278430000 | 2.835661000  | -0.553734000 |
| 1                             | -1.975161000 | 1.674408000  | 1.629974000  |
| 1                             | -0.673805000 | 0.500594000  | 1.852362000  |
| 1                             | -0.002241000 | 2.286133000  | 0.287064000  |
| 1                             | 1.993128000  | 4.223809000  | -3.631316000 |
| 1                             | 1.194741000  | -2.075513000 | -0.488370000 |
| 1                             | 3.324261000  | -2.756808000 | 0.471251000  |
| 1                             | 4.971934000  | -1.035870000 | 1.225745000  |
| 1                             | 4.477713000  | 1.370579000  | 0.786131000  |
| 1                             | 2.311124000  | 2.516069000  | -1.254736000 |

---

**Table S6.** Geometries of **3**, **3'**, **TS**, and **4** in Cartesian coordinates in Å computed at the PCM(water)/(TD- $\omega$ B97XD/6-311++G(d,p) level of theory.

| <b>3(S<sub>0</sub>)</b> |             |              |              |
|-------------------------|-------------|--------------|--------------|
| 6                       | 3.022032000 | 0.554475000  | 0.215546000  |
| 6                       | 3.313150000 | -0.645124000 | -0.695941000 |
| 6                       | 1.997613000 | -1.363718000 | -1.021863000 |
| 6                       | 1.341297000 | -1.839709000 | 0.277351000  |
| 6                       | 1.010649000 | -0.628990000 | 1.176939000  |
| 6                       | 2.342791000 | 0.073405000  | 1.508367000  |

|   |              |              |              |
|---|--------------|--------------|--------------|
| 6 | 2.088489000  | 1.522285000  | -0.522893000 |
| 6 | 1.028666000  | -0.405984000 | -1.727214000 |
| 6 | 0.069685000  | 0.387018000  | 0.480485000  |
| 6 | 0.757903000  | 0.820101000  | -0.842180000 |
| 8 | -0.016505000 | 1.592541000  | 1.283490000  |
| 6 | -1.374823000 | -0.075507000 | 0.258922000  |
| 6 | -1.838865000 | -1.358724000 | 0.549549000  |
| 6 | -3.147810000 | -1.750260000 | 0.289752000  |
| 6 | -4.038234000 | -0.840218000 | -0.265522000 |
| 6 | -3.628625000 | 0.463683000  | -0.503528000 |
| 6 | -2.323232000 | 0.853939000  | -0.217648000 |
| 8 | -2.022904000 | 2.168633000  | -0.401904000 |
| 1 | 3.957199000  | 1.064875000  | 0.466001000  |
| 1 | 3.797850000  | -0.305363000 | -1.618444000 |
| 1 | 4.002266000  | -1.339285000 | -0.201507000 |
| 1 | 2.194939000  | -2.225945000 | -1.666078000 |
| 1 | 2.022506000  | -2.498181000 | 0.827124000  |
| 1 | 0.459251000  | -2.431816000 | 0.033633000  |
| 1 | 0.538474000  | -0.971804000 | 2.104950000  |
| 1 | 2.175821000  | 0.916763000  | 2.181477000  |
| 1 | 2.992784000  | -0.637491000 | 2.029832000  |
| 1 | 1.910463000  | 2.416208000  | 0.077956000  |
| 1 | 2.551410000  | 1.844142000  | -1.462453000 |
| 1 | 1.453802000  | -0.066140000 | -2.677415000 |
| 1 | 0.091591000  | -0.923438000 | -1.959861000 |
| 1 | 0.104372000  | 1.509327000  | -1.380653000 |
| 1 | -0.400014000 | 1.359358000  | 2.134106000  |
| 1 | -1.171496000 | -2.081135000 | 0.997505000  |
| 1 | -3.464233000 | -2.760375000 | 0.521781000  |
| 1 | -5.058469000 | -1.133029000 | -0.487063000 |
| 1 | -4.317989000 | 1.207592000  | -0.886624000 |
| 1 | -1.249373000 | 2.366306000  | 0.152326000  |

---

**3(S<sub>1</sub>)**

|   |              |              |              |
|---|--------------|--------------|--------------|
| 6 | 3.031351000  | 0.505052000  | -0.012337000 |
| 6 | 3.197768000  | -0.827434000 | -0.756111000 |
| 6 | 1.832315000  | -1.518081000 | -0.874611000 |
| 6 | 1.266796000  | -1.772357000 | 0.526982000  |
| 6 | 1.072070000  | -0.433212000 | 1.267161000  |
| 6 | 2.446659000  | 0.250272000  | 1.386145000  |
| 6 | 2.075554000  | 1.404043000  | -0.807195000 |
| 6 | 0.853040000  | -0.619974000 | -1.643853000 |
| 6 | 0.101144000  | 0.488666000  | 0.496716000  |
| 6 | 0.700093000  | 0.725832000  | -0.919726000 |
| 8 | 0.089431000  | 1.832896000  | 1.109599000  |
| 6 | -1.328180000 | 0.020469000  | 0.463808000  |
| 6 | -1.856390000 | -1.197863000 | 0.957699000  |
| 6 | -3.053520000 | -1.712780000 | 0.428225000  |
| 6 | -3.839939000 | -1.004314000 | -0.520120000 |
| 6 | -3.532314000 | 0.358757000  | -0.717400000 |
| 6 | -2.314264000 | 0.857398000  | -0.212717000 |

|   |              |              |              |
|---|--------------|--------------|--------------|
| 8 | -2.111220000 | 2.164701000  | -0.289804000 |
| 1 | 4.003595000  | 0.998073000  | 0.085047000  |
| 1 | 3.619319000  | -0.649576000 | -1.752174000 |
| 1 | 3.896991000  | -1.476984000 | -0.217118000 |
| 1 | 1.943247000  | -2.471730000 | -1.399853000 |
| 1 | 1.959819000  | -2.391584000 | 1.107088000  |
| 1 | 0.330190000  | -2.326401000 | 0.447690000  |
| 1 | 0.666631000  | -0.617425000 | 2.268763000  |
| 1 | 2.361901000  | 1.191029000  | 1.935196000  |
| 1 | 3.114845000  | -0.402760000 | 1.958029000  |
| 1 | 1.979161000  | 2.379720000  | -0.327133000 |
| 1 | 2.471354000  | 1.570516000  | -1.815801000 |
| 1 | 1.222501000  | -0.438004000 | -2.658604000 |
| 1 | -0.120046000 | -1.114800000 | -1.734375000 |
| 1 | 0.023886000  | 1.369344000  | -1.490123000 |
| 1 | -0.215525000 | 1.727676000  | 2.017498000  |
| 1 | -1.321097000 | -1.783216000 | 1.694825000  |
| 1 | -3.391897000 | -2.687658000 | 0.768261000  |
| 1 | -4.754205000 | -1.433889000 | -0.906232000 |
| 1 | -4.250921000 | 1.064620000  | -1.120281000 |
| 1 | -1.278530000 | 2.365422000  | 0.204937000  |

---

**3'(S<sub>0</sub>)**

|   |              |              |              |
|---|--------------|--------------|--------------|
| 6 | -3.095590000 | -0.271846000 | 0.373440000  |
| 6 | -3.217436000 | 0.321386000  | -1.036577000 |
| 6 | -1.815760000 | 0.597791000  | -1.597765000 |
| 6 | -1.076848000 | 1.587822000  | -0.688163000 |
| 6 | -0.936867000 | 0.980263000  | 0.722257000  |
| 6 | -2.346478000 | 0.708043000  | 1.280278000  |
| 6 | -2.295917000 | -1.576253000 | 0.314937000  |
| 6 | -1.012342000 | -0.707969000 | -1.654335000 |
| 6 | -0.104697000 | -0.333936000 | 0.679499000  |
| 6 | -0.890362000 | -1.305473000 | -0.244378000 |
| 8 | -0.094745000 | -0.942274000 | 1.979397000  |
| 6 | 1.374977000  | -0.209047000 | 0.230977000  |
| 6 | 2.041567000  | -1.417171000 | -0.038649000 |
| 6 | 3.369047000  | -1.493098000 | -0.418378000 |
| 6 | 4.108627000  | -0.319567000 | -0.537332000 |
| 6 | 3.505626000  | 0.885984000  | -0.243281000 |
| 6 | 2.165380000  | 0.952374000  | 0.157600000  |
| 8 | 1.761965000  | 2.220268000  | 0.455157000  |
| 1 | -4.091838000 | -0.463424000 | 0.783601000  |
| 1 | -3.752141000 | -0.375180000 | -1.692238000 |
| 1 | -3.797430000 | 1.250795000  | -1.005510000 |
| 1 | -1.896110000 | 1.024093000  | -2.602074000 |
| 1 | -1.631687000 | 2.529172000  | -0.617893000 |
| 1 | -0.104054000 | 1.821738000  | -1.128869000 |
| 1 | -0.485650000 | 1.685953000  | 1.432745000  |
| 1 | -2.275378000 | 0.308261000  | 2.294084000  |
| 1 | -2.883377000 | 1.660972000  | 1.338364000  |
| 1 | -2.226189000 | -2.024500000 | 1.308665000  |

---

---

|   |              |              |              |
|---|--------------|--------------|--------------|
| 1 | -2.796900000 | -2.299726000 | -0.337902000 |
| 1 | -1.513622000 | -1.431607000 | -2.305627000 |
| 1 | -0.020308000 | -0.523063000 | -2.079236000 |
| 1 | -0.361740000 | -2.257220000 | -0.296960000 |
| 1 | 0.479483000  | -0.423272000 | 2.547857000  |
| 1 | 1.493653000  | -2.344170000 | 0.066612000  |
| 1 | 3.821616000  | -2.457451000 | -0.616806000 |
| 1 | 5.148687000  | -0.345629000 | -0.842103000 |
| 1 | 4.058246000  | 1.816861000  | -0.300506000 |
| 1 | 0.859421000  | 2.227630000  | 0.776595000  |

---

**3'(S<sub>1</sub>)**

|   |              |              |              |
|---|--------------|--------------|--------------|
| 6 | -3.039237000 | -0.139118000 | 0.074436000  |
| 6 | -2.882258000 | 0.158536000  | -1.423278000 |
| 6 | -1.391258000 | 0.291498000  | -1.764789000 |
| 6 | -0.777232000 | 1.432622000  | -0.945380000 |
| 6 | -0.918984000 | 1.132095000  | 0.556707000  |
| 6 | -2.413916000 | 0.997700000  | 0.893941000  |
| 6 | -2.316224000 | -1.449396000 | 0.411494000  |
| 6 | -0.661195000 | -1.013601000 | -1.418194000 |
| 6 | -0.177975000 | -0.181253000 | 0.921335000  |
| 6 | -0.822592000 | -1.317999000 | 0.078121000  |
| 8 | -0.430266000 | -0.538070000 | 2.298084000  |
| 6 | 1.332950000  | -0.137672000 | 0.738170000  |
| 6 | 2.075892000  | -1.360304000 | 0.750827000  |
| 6 | 3.009723000  | -1.585276000 | -0.256645000 |
| 6 | 3.443834000  | -0.548750000 | -1.132933000 |
| 6 | 3.074007000  | 0.762866000  | -0.830050000 |
| 6 | 2.102090000  | 0.967467000  | 0.158031000  |
| 8 | 2.034873000  | 2.198260000  | 0.679542000  |
| 1 | -4.101083000 | -0.228327000 | 0.324589000  |
| 1 | -3.332106000 | -0.647071000 | -2.015047000 |
| 1 | -3.408379000 | 1.085069000  | -1.680643000 |
| 1 | -1.273018000 | 0.506628000  | -2.831303000 |
| 1 | -1.283402000 | 2.378315000  | -1.168079000 |
| 1 | 0.270939000  | 1.565300000  | -1.234236000 |
| 1 | -0.519132000 | 1.964278000  | 1.146970000  |
| 1 | -2.540352000 | 0.807080000  | 1.962292000  |
| 1 | -2.912962000 | 1.946015000  | 0.665689000  |
| 1 | -2.448713000 | -1.696562000 | 1.467300000  |
| 1 | -2.739293000 | -2.273591000 | -0.175004000 |
| 1 | -1.076876000 | -1.843587000 | -1.999820000 |
| 1 | 0.399656000  | -0.933427000 | -1.679124000 |
| 1 | -0.306951000 | -2.249683000 | 0.324268000  |
| 1 | 0.157289000  | 0.000753000  | 2.836621000  |
| 1 | 1.774575000  | -2.178109000 | 1.395931000  |
| 1 | 3.409000000  | -2.587098000 | -0.390086000 |
| 1 | 4.185589000  | -0.754991000 | -1.893773000 |
| 1 | 3.645391000  | 1.613705000  | -1.188053000 |
| 1 | 1.437221000  | 2.187292000  | 1.439752000  |

---

| <b>TS(S<sub>0</sub>)</b> |              |              |              |
|--------------------------|--------------|--------------|--------------|
| 6                        | -2.967272000 | 0.602205000  | -0.258292000 |
| 6                        | -3.360304000 | -0.626338000 | 0.573406000  |
| 6                        | -2.096892000 | -1.415280000 | 0.942843000  |
| 6                        | -1.387047000 | -1.873018000 | -0.334266000 |
| 6                        | -0.959896000 | -0.628733000 | -1.167231000 |
| 6                        | -2.235042000 | 0.156288000  | -1.530734000 |
| 6                        | -2.038921000 | 1.496688000  | 0.570132000  |
| 6                        | -1.137767000 | -0.530206000 | 1.746991000  |
| 6                        | -0.038992000 | 0.187396000  | -0.295698000 |
| 6                        | -0.753884000 | 0.731645000  | 0.922377000  |
| 8                        | 0.121074000  | 1.939582000  | -1.297437000 |
| 6                        | 1.373459000  | -0.118308000 | -0.206931000 |
| 6                        | 1.888673000  | -1.354742000 | -0.653217000 |
| 6                        | 3.196322000  | -1.715217000 | -0.420655000 |
| 6                        | 4.044349000  | -0.813546000 | 0.249331000  |
| 6                        | 3.605452000  | 0.434394000  | 0.621677000  |
| 6                        | 2.274679000  | 0.863430000  | 0.347230000  |
| 8                        | 1.914793000  | 2.085659000  | 0.497865000  |
| 1                        | -3.863923000 | 1.163319000  | -0.536604000 |
| 1                        | -3.885788000 | -0.311335000 | 1.481405000  |
| 1                        | -4.044306000 | -1.265873000 | 0.004974000  |
| 1                        | -2.366449000 | -2.292246000 | 1.538310000  |
| 1                        | -2.054734000 | -2.476395000 | -0.956576000 |
| 1                        | -0.526036000 | -2.494435000 | -0.080786000 |
| 1                        | -0.441935000 | -0.947039000 | -2.073658000 |
| 1                        | -1.982011000 | 1.020290000  | -2.146992000 |
| 1                        | -2.877311000 | -0.499388000 | -2.127175000 |
| 1                        | -1.796141000 | 2.409501000  | 0.025667000  |
| 1                        | -2.531365000 | 1.787853000  | 1.503670000  |
| 1                        | -1.609075000 | -0.188174000 | 2.673210000  |
| 1                        | -0.239201000 | -1.089905000 | 2.023331000  |
| 1                        | -0.077990000 | 1.352483000  | 1.506018000  |
| 1                        | 0.590089000  | 1.727100000  | -2.111115000 |
| 1                        | 1.236195000  | -2.060446000 | -1.152224000 |
| 1                        | 3.562869000  | -2.684183000 | -0.736459000 |
| 1                        | 5.071194000  | -1.099924000 | 0.455031000  |
| 1                        | 4.276521000  | 1.145304000  | 1.091941000  |
| 1                        | 0.830961000  | 2.221638000  | -0.627174000 |

| <b>4(S<sub>0</sub>)</b> |              |              |              |
|-------------------------|--------------|--------------|--------------|
| 6                       | 2.581119000  | -0.313743000 | 1.278099000  |
| 6                       | 3.494395000  | 0.019886000  | 0.088506000  |
| 6                       | 2.643828000  | 0.286424000  | -1.163041000 |
| 6                       | 1.803307000  | -0.952127000 | -1.485415000 |
| 6                       | 0.881141000  | -1.293869000 | -0.289651000 |
| 6                       | 1.747080000  | -1.557395000 | 0.958918000  |
| 6                       | 1.623294000  | 0.851554000  | 1.533545000  |
| 6                       | 1.698357000  | 1.464797000  | -0.906564000 |
| 6                       | -0.026857000 | -0.107877000 | -0.058586000 |
| 6                       | 0.765211000  | 1.131425000  | 0.278660000  |

|   |              |               |              |
|---|--------------|---------------|--------------|
| 6 | -1.396181000 | -0.169954000  | -0.133585000 |
| 6 | -2.082209000 | -1.451941000  | -0.229508000 |
| 6 | -3.415710000 | -1.576570000  | -0.067960000 |
| 6 | -4.221741000 | -0.414934000  | 0.198980000  |
| 6 | -3.677798000 | 0.819858000   | 0.234060000  |
| 6 | -2.262446000 | 1.045484000   | -0.045975000 |
| 8 | -1.855445000 | 2.194721000   | -0.239630000 |
| 1 | 3.187464000  | -0.496954000  | 2.170111000  |
| 1 | 4.102465000  | 0.901065000   | 0.320917000  |
| 1 | 4.183555000  | -0.8111117000 | -0.098317000 |
| 1 | 3.295624000  | 0.516357000   | -2.011128000 |
| 1 | 2.446177000  | -1.816766000  | -1.680588000 |
| 1 | 1.201070000  | -0.782681000  | -2.383961000 |
| 1 | 0.325851000  | -2.195625000  | -0.533430000 |
| 1 | 1.107543000  | -1.817593000  | 1.808642000  |
| 1 | 2.393662000  | -2.418268000  | 0.759399000  |
| 1 | 0.973759000  | 0.631339000   | 2.387288000  |
| 1 | 2.179399000  | 1.763551000   | 1.775123000  |
| 1 | 2.264895000  | 2.369229000   | -0.661287000 |
| 1 | 1.105111000  | 1.681478000   | -1.800783000 |
| 1 | 0.103348000  | 1.969173000   | 0.463374000  |
| 1 | -1.500323000 | -2.348169000  | -0.392562000 |
| 1 | -3.885948000 | -2.551137000  | -0.116213000 |
| 1 | -5.287016000 | -0.541855000  | 0.363397000  |
| 1 | -4.281809000 | 1.704103000   | 0.404166000  |

---

**4(S<sub>1</sub>)**

|   |              |              |              |
|---|--------------|--------------|--------------|
| 6 | 2.501209000  | -0.799054000 | 1.085320000  |
| 6 | 3.485442000  | -0.087762000 | 0.145069000  |
| 6 | 2.705573000  | 0.663548000  | -0.944414000 |
| 6 | 1.857008000  | -0.328205000 | -1.748160000 |
| 6 | 0.855194000  | -1.039236000 | -0.808065000 |
| 6 | 1.660884000  | -1.800366000 | 0.287922000  |
| 6 | 1.576786000  | 0.231572000  | 1.744938000  |
| 6 | 1.783290000  | 1.698516000  | -0.293741000 |
| 6 | 0.001579000  | -0.032506000 | -0.108862000 |
| 6 | 0.776180000  | 0.990607000  | 0.642559000  |
| 6 | -1.416537000 | -0.157429000 | -0.054520000 |
| 6 | -2.032200000 | -1.400149000 | 0.000261000  |
| 6 | -3.438158000 | -1.560666000 | 0.004653000  |
| 6 | -4.260964000 | -0.447979000 | 0.003847000  |
| 6 | -3.694404000 | 0.828218000  | -0.003341000 |
| 6 | -2.284956000 | 1.050334000  | -0.008129000 |
| 8 | -1.790204000 | 2.204484000  | -0.001181000 |
| 1 | 3.055380000  | -1.332828000 | 1.864113000  |
| 1 | 4.104158000  | 0.614614000  | 0.713994000  |
| 1 | 4.159697000  | -0.819486000 | -0.313145000 |
| 1 | 3.406382000  | 1.167888000  | -1.616771000 |
| 1 | 2.492721000  | -1.083536000 | -2.221981000 |
| 1 | 1.311290000  | 0.189620000  | -2.542865000 |
| 1 | 0.245385000  | -1.739070000 | -1.381937000 |

|   |              |              |              |
|---|--------------|--------------|--------------|
| 1 | 0.975241000  | -2.339898000 | 0.948637000  |
| 1 | 2.300398000  | -2.541747000 | -0.203804000 |
| 1 | 0.883729000  | -0.258452000 | 2.435504000  |
| 1 | 2.156599000  | 0.962895000  | 2.318021000  |
| 1 | 2.366554000  | 2.415626000  | 0.294228000  |
| 1 | 1.236273000  | 2.261212000  | -1.055839000 |
| 1 | 0.106985000  | 1.713658000  | 1.106639000  |
| 1 | -1.416497000 | -2.290577000 | 0.067608000  |
| 1 | -3.856151000 | -2.560087000 | -0.000416000 |
| 1 | -5.338644000 | -0.561519000 | 0.000101000  |
| 1 | -4.323422000 | 1.709139000  | -0.074671000 |

---

---

<sup>1</sup> K. Ekvall, P. van der Meulen, C. Dhollande, L.-E. Berg, S. Pommeret, R. Naskrecki, J.-C. Mialocq, *J. Appl. Phys.* 2000, **87**, 2340-2352.
